# Supplementary material for: Novel tRNA-like transcripts from the NEAT1-MALAT1 genomic region critically influence human innate immunity and macrophage functions
Source: Research Square preprint supplement (doi:10.21203/rs.3.rs-1540419/v1), 2022-04-14
Supplement: Supplementary file 1 [file a7f3669dfe9f47be16ec1b96.docx]

SUPPLEMENTAL MATERIAL

Novel tRNA-like transcripts from the *NEAT1-MALAT1* genomic region critically influence human innate immunity and macrophage functions

Martina Gast 1,2 #, Vanasa Nageswaran 1,3 #, Andreas W. Kuss 4 #, Ana Tzvetkova 4,5, Xiaomin Wang 1, Liliana H. Mochmann 1, Pegah Ramezani-Rad 1, Stefan Weiss 4,6, Stefan Simm 5, Tanja Zeller 7,8, Henry Voelzke 6,9, Wolfgang Hoffmann 6,9, Uwe Völker 4,6, Stefan B. Felix 6,10, Marcus Dörr 6,10, Antje Beling 2,11,12, Carsten Skurk 1,2, David-Manuel Leistner 1,2,12, Bernhard H. Rauch 6,13,14, Tetsuro Hirose 15, Bettina Heidecker 1, Karin Klingel 16, Shinichi Nakagawa 17,18, Wolfram C. Poller 19,20, Filip K. Swirski 19,20,

Arash Haghikia 1,2,12 #, Wolfgang Poller 1,2,21 # §

1 Department of Cardiology, Campus *Benjamin Franklin*; 11 Institute for Biochemistry; and 21 Berlin-Brandenburg Center for Regenerative Therapies (BCRT), all at Charité - Universitätsmedizin Berlin, Charité-Universitätsmedizin Berlin, corporate member of Freie Universität Berlin, Humboldt-Universität zu Berlin, and Berlin Institute of Health, Berlin, Germany.

3 Institute for Chemistry and Biochemistry, Freie Universität Berlin, Berlin, Germany.

4 Department of Functional Genomics, Interfaculty Institute of Genetics and Functional Genomics; and 5 Institute of Bioinformatics, both at University Medicine Greifswald, Greifswald, Germany.

7 Clinic for General and Interventional Cardiology, University Heart and Vascular Center Hamburg, Hamburg, Germany.

9 Institute for Community Medicine, University Medicine Greifswald, Greifswald, Germany.

10 Department of Cardiology, University Medicine Greifswald, Greifswald, Germany.

12 Berlin Institute of Health (BIH), Berlin, Germany.

13 Institute for Pharmacology, University Medicine Greifswald, Greifswald, Germany.

14 Department Human Medicine, Section Pharmacology and Toxicology, Carl von Ossietzky Universität, Oldenburg, Germany.

15 Graduate School of Frontier Biosciences, Osaka University, 1-3 Yamadaoka, Suita 565-0871, Japan.

16 Institute for Pathology and Neuropathology, Department of Pathology, University Hospital Tübingen, Germany.

17 RNA Biology Laboratory, RIKEN Advanced Research Institute, Wako, Saitama, Japan.

18 Faculty of Pharmaceutical Sciences, Hokkaido University, Sapporo, Japan.

19 Center for Systems Biology, Massachusetts General Hospital and Harvard Medical School, MA, USA.

20 Cardiovascular Research Institute, Icahn School of Medicine at Mount Sinai, New York, NY, USA

German Center for Cardiovascular Research (DZHK) 2 Site Berlin, 6 Site Greifswald, 8 Site Hamburg/Lübeck/Kiel,

Germany.

# equal contributions § correspondence

**Running Title**: A novel class of tRNA-like small noncoding RNAs

For high resolution versions of the supplemental figures please refer to the Supplementary Information source file.

Patients and Methods

For human studies approval was granted by the institutional ethics review board and the regulatory authorities. Investigation of human tissues was conform to the principles in the Declaration of Helsinki. Informed consent was given prior to inclusion of people in the study.

***SHIP population study and cohorts***

SHIP samples were genotyped using the *Affymetrix Genome-Wide Human SNP Array 6.0*. Genotyping of samples within SHIP-TREND was obtained in two batches using *Illumina Infinium HumanOmni2.5 BeadChip* and the *Illumina Infinium Global Screening Array*, respectively. Genotypes were determined using *Birdseed 2* for SHIP and the *GenomeStudio 2.0 Genotyping Module* (*GenCall algorithm*) for SHIP-TREND. Standard genotype quality control was performed excluding arrays < 92% sample call rate for SHIP and <94% sample call rate for SHIP-TREND and duplicates (based on estimated IBD), mismatches between reported and genotyped sex, genetic PCA outliers, and arrays with extreme heterozygosity. Variants with call rate < 0.95 and a Hardy-Weinberg equilibrium p-value < 0.0001 were removed before imputation. Pre-phasing and Imputation of genotypes was performed with the Eagle and Minimac3 software to HRC reference v1.1 panel on Michigan Imputation Server v1.0.1 (<https://imputationserver.sph.umich.edu/>).

***CRISPR-Cas9 experiments***

THP-1 cells were grown in RPMI medium containing FCS (10% [v/v]) and penicillin/streptomycin (50 I.U./50 μg/ml). Parts of the menRNA and mascRNA regions were deleted from THP-1 cells using an adaptation of the CRISPR/Cas9 protocol described in Gundry *et al*. 2016. Protospacer sequences for each target gene were identified using the CRISPRscan scoring algorithm [[www.crisprscan.org](http://www.crisprscan.org/) (Moreno-Mateos *et al.*)]. Extensive target searches employing <http://www.crisprscan.com/>, <http://crispor.tefor.net/>, and <https://cctop.cos.uni-heidelberg.de> identified no off-targets of potential relevance. DNA templates for single guide RNAs (sgRNAs) were generated by PCR (KAPA HiFi HotStart ReadyMix PCR Kit) using the pX458 plasmid containing the sgRNA scaffold sequence and using the following primers:

| G1_human_mascRNA | taatacgactcactataGGTTGGCACTCCTGGTTTCCgttttagagctagaaatagc |
| --- | --- |
| G5_human_mascRNA | taatacgactcactataGGACGGGGTTCAAATCCCTGgttttagagctagaaatagc |

| G9_human_menRNA | taatacgactcactataGGGGCACGTCCAGCACGGCTgttttagagctagaaatagc |
| --- | --- |
| G10_human_menRNA | taatacgactcactataGGTCCAGCACGGCTGGGCCGgttttagagctagaaatagc |

| universal reverse | AGCACCGACTCGGTGCCACT |
| --- | --- |

PCR products were used to generate sgRNAs by *in vitro* transcription using HiScribe T7 High Yield RNA Synthesis Kit. 0.5µg of purified sgRNA was incubated with Cas9 protein (1 μg; PNA Bio) for 15-20 min at room temperature. 2x105 THP-1 cells were electroporated with the sgRNA/Cas9 complex using the Neon Transfection System at 1400 V, 20 ms, and one pulse. For the small RNA-deficient cell lines, two sgRNAs were selected at either end of the target sequence to delete the region in between. Deletion of *mascRNA* and *menRNA* was confirmed by PCR with the following primer pairs:

| CRISPR_hu-masc_fw | CGTATTGTTTTCTCAGGTTTTGC |
| --- | --- |
| CRISPR_hu-masc_rev | ACCTCCCCAAAACTCCAAGA |

| CRISPR_hu-men_fw | TCTGTGAAAGAGTGAGCAGGA |
| --- | --- |
| CRISPR_hu-masc_rev | CCCAATGCTACCCCTCTAGG |

Single-cell clones were generated by single-cell plating of the parental cell line. Gene deletions in the single-cell clones were confirmed by sequencing and proved to be stable over >25 passages so far.

***Cell culture studies***

*Human monocyte cultures*

Human THP-1 cells were cultured in RPMI 1640 medium with 10% fetal bovine serum, 2 mM L-glutamine, 100 U/mL penicillin and 100 μg/mL streptomycin. For gene expression analysis of wildtype (WT) and CRISPR-Cas9 targeted THP-1 cells under immune challenge, cells were stimulated with 100 ng/ml LPS, 10 ng/ml LPS 1 μg/ml, 1 ng/ml LPS, or 1 μg/ml Concanavalin A (Con A). After 24 h, RNA was isolated by TRIzol/Chloroform.

*THP-1 monocyte adhesion to flow-primed human aortic endothelial cells*

For analysis of WT and CRISPR-Cas9 targeted THP-1 monocytes adhesion to flow-primed endothelial cells, primary human aortic endothelial cells (HAECs) were cultured in Endothelial Growth Medium-2 with 10% fetal bovine serum, 100 U/mL penicillin and 100 μg/mL streptomycin and seeded to confluence in µ-Slide y-shaped ibiTreat chambers . Endothelial cells were exposed to unidirectional flow (20 dyn/cm2) for 48 h using yellow/green perfusion sets prior to the experiment. THP-1 monocytes were labelled with 1,1'-dioctadecyl-3,3,3',3'-tetramethylindocarbocyanine (DiI) for 15 min at 37°C, respectively, and after three times wahsing 1 × 106 labelled cells were added to the flow reservoir for 30 min. After flow-termination, non-adherent cells were gently washed out with PBS, then cells were fixed with 4% paraformaldehyde and the number of cells adhering to both the straight and branched channel regions was assessed by fluorescence phase-contrast microscope quantified using ImageJ Software.

*Tube formation angiogenesis assay*

*(a) Conditioned media transfer experiment*: Tube formation by HAECs treated with DmenRNA and DmascRNA monocyte-conditioned media was assayed on reduced growth factor basement membrane extract (BME) in 96-well tissue cultured-treated clear-bottom plates (15 × 103 cells per well). Briefly, 60 µl of ice-cold BME was added per well and incubated at 37°C and 5% CO2 for 30 min to allow gel formation. HAECs were plated on top of the gelled BME at a density of 1.5 x 104 cells/well in 50 µl culture medium followed by transfer of 50 µl of monocyte-conditioned media of both DmenRNA and DmascRNA and incubated further for 24 h. After tube formation was observed, endothelial cells were stained by adding 50 µl of 6 µM Calcein AM solution per well for 15 min at 37°C. Tubular network of the cells was captured using a fluorescent inverted microscope and quantified by ImageJ Software.

*(b) Monocyte-HAEC co-cultures in matrigel*: Endothelial tube formation in reduced growth factor matrigel was performed similarly as described above. Here, direct DiI-labeled co-cultured DmenRNA and DmascRNA monocytes at a cell density of 5 x 103 per well together with HAECs (1.5 x 104 cells/well) were added on the BME gel and cultured for 24 h at 37°C and 5% CO2 to form tubular networks.

***Reactive oxygen species assay***

Intracellular ROS production in WT and CRISPR-Cas9 targeted THP-1 macrophages was determined as previously described using 2',7'-dichlorodihydrofluorescein diacetate (H2DCFDA). Upon cleavage of the acetate groups by intracellular esterases, the cell-permeant H2DCFDA is retained within the cells and easily oxidized to the highly fluorescent 2′,7′-dichlorofluorescin (DCF) in response to ROS production/oxidative stress. Control and CRISPR/Cas9-targeted THP-1 cells were cultured in black 96 wells (overnight treatment with 0,1 µM PMA) before LPS addition for 24h. After washing with HBSS, cells were incubated with 5 μM H2DCFDA (Molecular Probes) in HBSS for 1 h at 37 °C. Cells were washed again and ROS production was induced by 400 μM H2O2. Fluorescence intensity was quantified every 10 min (excitation 485 nm, emission 535 nm) at 37°C using a fluorescence plate reader (Tecan).

***Cytokine measurements***

Conditioned cell culture media of wildtype (WT) and CRISPR-Cas9 targeted THP-1 cells were tested for IFNγ, TNF, IL6, MCP1, IL10, and IL12p70 by use of *Mouse Inflammation Cytometric Bead Assay* (CBA) (*BD Biosciences, Heidelberg, Germany*) on a *FACS CantoII flow cytometer* (*BD Biosciences*) according to the manufacturer’s protocol.

***Cell proliferation studies***

The proliferation assay of WT and CRISPR-Cas9 targeted THP-1 cells was conducted as follows: 5 x104 cells were seeded into clear 96 well plates, one plate for each time point. Proliferation was determined using WST1 reagent (*Sigma-Aldrich*) according to the manufacturer’s instructions. Absorbance at 450 nm was measured 2 h after addition of WST1 and incubation at 37°C on a *Tecan* plate reader. Absorbance of WT cells was set to one at each time point.

***Foam cell formation and oxLDL uptake***

To induce foam cell formation, we seeded 5x105 THP-1 monocytes per well containing glass cover slips. Monocyte differentiation into macrophages was induced by adding 100 nM PMA to each well on days 0 and 1 and incubation for 48h hours. Thereafter the thus generated macrophages were washed with PBS, then incubated with 50µg/ml human ox-LDL for 24h in serum-free medium to induce foam cell formation. After ox-LDL incubation, Oil Red O staining (ORO) of the cells was performed as follows: wash with PBS, fix cells with 4% PFA/PBS for 15 min at RT, wash 3 times with PBS, rinse with 60% isopropanol for 15 s to facilitate the staining of neutral lipids, stain cells with filtered ORO working solution for 15 min at RT and in dark. ORO stock solution was prepared by dissolving 0.5 g ORO powder in 80 ml isopropanol (100%), mixed at 56 °C overnight, adjusted to 100 ml, mixed under gentle stirring, and filtered after pre-warming to 60°C. Working solution was prepared by diluting ORO stock solution with ddH2O 3:2 = factor 1.5. For staining, cells were rinsed with water and then hematoxylin used as a counterstain (cell nuclei) for 10 s. Destaining by washing with 60% isopropanol for 15 s, then PBS 3 times. Glass cover slips were taken out and mounted on slides for polarization microscopy and microphotography.

***Monocyte-macrophage transition and macrophage polarization experiments***

Monocyte-M0 macrophage differentiation and subsequent M1/M2 macrophage polarization studies employing FACS and TaqMan were conducted as follows: First, M0 macrophages were generated by incubation of THP-1 monocyte clones for seven days, with PMA at a concentration of 100 ng/ml. Thereafter, the cells were further incubated for another seven days, either with IFN-g at 20 ng/ml plus LPS at 100 ng/ml to induce M1 polarization, or with IL-4 at 20 ng/ml plus IL-13 at 20 ng/ml to induce M2 polarization. The ’M0’ TaqMan-based expression profiles and FACS data in Fig. 7 were obtained on day 7 of culture to characterize monocyte - M0 macrophage transition. The ’M1’ and ’M2’ expression profiles displayed there were obtained in day 14 of culture.

***FACS analyses of the macrophage clones***

After macrophage polarization, cells were washed once with ice-cold PBS and scrapped off using a mini scraper. Subsequently, macrophages were again washed with PBS + 5% FBS and incubated with 50 µl Fcγ-receptor block (*BD Biosciences*) in PBS for 10 min at RT to block unspecific binding. Cells were centrifuged at 300 x g for 5 min at 4°C. Then cells pellets were resuspended with 50 µl of FACS Buffer (PBS + 0,5%FBS + 0,05% NaN3) and stained with APC mouse anti-human CD14 (*BioLegend*), PE mouse anti-human CD11b (*BD Biosciences*) and Live/Dead Fixable Aqua Dead Cell Stain (*Invitrogen*) for 30 min at 4 °C in the dark. Cells were resuspended in 450 µl of FACS Buffer and analyzed with Attune™ NxT Flow Cytometer (*Thermo Fisher Scientific*). Statistical analysis was performed using GraphPad Prism 9 software. Experimental data were analyzed by using one-way analysis of variance (ANOVA) with Dunnett´s post hoc test for multiple comparisons. The distribution of variables was assessed by Kolmogorov–Smirnov tests of normality.

***Human adenovirus and coxsackievirus B3 studies***

THP-1 cells were cultured in *RPMI 1640* medium (ATCC modification + 10 % fetal calf serum + 1 % P/S) at 37 °C, 5 % CO2. 5x105 cells were seeded in 12-well culture plates and differentiation to macrophage-like cells was triggered by addition of 0.1 μM PMA o/n. Afterwards cells were transduced with coxsackievirus B3 at MOI 30. Detection of CVB3 genome, replicative intermediates, and plaque forming units (PFU) was conducted as described. In the adenovirus experiments, cells were instead transduced with a recombinant adenoviral virus expressing GFP (AdV5-GFP) or an “empty” adenovector expressing no transgene, at MOI 25, 12h post PMA addition. Virus structures were described previously.

***RNA sequencing and data analysis***

For the transcriptome mapping of control *vs.* CRISPR‐Cas9 generated DmenRNA or DmascRNA cells, four biological cell culture replicates were grown for each of the three clones. From each of these cultures separate total RNA isolations were conducted by *TRIZOL*/Chloroform method. Thereafter the individual RNA preps were pooled for each of the clones, and the three resulting RNA pools (control, DmenRNA, DmascRNA) were subsequently used for RNA-seq analyses as follows. RNA integrity was visualized using *Agilent Bioanalyzer 2100*. For NGS-library preparation we used *Illumina TruSeq Stranded Total RNA Library Prep* Human/Mouse/Rat (S45-S56) or *NEBNext Ultr II Directional RNA Library Prep* Kit Illumina (E7760S) in combination with the *NEBNext rRNA Depletion Kit* (Human/Mouse/Rat) (E6310L) (S145-S154). For all samples paired end (2x75bp) sequencing was carried out on an *Illumina NextSeq* platform using *NextSeq 500/550 High Output Kit v2.5* (150 cycles). The resulting reads were mapped to the human genome (GRCh37 release 87/hg19) using *STAR* *v2.7.5b* with standard options. We then ran the *htseq-count module* from software package *HTSeq* with the stranded=reverse option reflecting the used library kit. As we used rRNA-depleted samples, all with rRNA-annotation were excluded from further analyses. To detect differentially expressed genes we used the R package DESeq v1.34.1. Next we normalized the raw gene specific read counts as Transcripts per Million base pairs (TPM) in order to perform a gene set enrichment analysis (GSEA) using the *R package ssGSEA2.0* by mapping them against a selection of gene set collections from *Molecular Signature Database (MsigDB)*. We thus generated Enrichment Scores (ES) for each sample and various gene sets. ES reflects how strongly the majority of genes from an individual gene set are expressed per regarded sample. This ES was then normalized to account for variations in gene set size. To correct for multiple testing the ssGSEA package uses Benjamini-Hochberg method, which calculates false discovery rates (FDR). For any combination of gene set and sample with a FDR value ≥ 0.05 we set the NES to zero. The gene set collections we used were: C2.CP: Canonical pathways; KEGG selection as a subset of CP; C2.CGP: chemical and genetic perturbations; C7: immunologic signature gene sets.

**Quantitative RT-PCR**

For quantitative gene expression analyses, isolated RNA was digested using *RNase free peqGOLD DNase I* (*Peqlab, Erlangen, Germany*) for 30 min to avoid genomic DNA contamination. To analyze the mRNA expression of target genes, 1 µg to 1,5 µg of total RNA was reverse transcribed using the *High Capacity RNA-to-cDNA* kit (*Life Technologies, Darmstadt, Germany*) according to the manufacturer’s protocol and finally diluted to a concentration of 25 ng/µl. Assays for the following human target and reference genes were employed:

| RT-PCR target | Gene name | TaqMan assay ID |
| --- | --- | --- |
|  |  |  |
| AEN | apoptosis enhancing nuclease | Hs00224322_m1 |
| AGO1 | argonaute RISC component 1 | Hs01084661_m1 |
| AGO2 | argonaute RISC component 2 | Hs01085579_m1 |
| ANG | angiogenin | Hs04195574_sH |
| ANGPT1 | angiopoietin 1 | Hs00919201_m1 |
| ANGPT4 | angiopoietin 4 | Hs00907074_m1 |
| ANGPTL4 | angiopoietin like 6 | Hs01101122_m1 |
| BOK | BCL2 family apoptosis regulator BOK | Hs00261296_m1 |
| CIITA | class II major histocompatibility complex transactivator | Hs00931699_m1 |
| CCR5 | C-C motif chemokine receptor 5 | Hs00152917_m1 |
| CCR7 | C-C motif chemokine receptor 7 | Hs01013469_m1 |
| CD11b (ITGAM) | integrin subunit M |  |
| CD11c (ITGAX) | integrin subunit X |  |
| CD36 (SCARB3) | scavenger receptor |  |
| CD64 (FCGR1A) | IgG Fc receptor 1 |  |
| CD80 | CTLA-4 counter-receptor |  |
| CD93 (C1QR1) |  |  |
| CSF1 (MCSF) | macrophage colony stimulating factor |  |
| CSF1R (CD115) | CSF1 receptor |  |
| CTIF | cap binding complex dependent translation initiation factor | Hs00969548_m1 |
| EEF1A2 | eukaryotic translation elongation factor 1  | Hs00951287_m1 |
| EIF3CL | eukaryotic translation initiation factor 3 subunit C like | Hs01105769_g1 |
| ESAM | endothelial cell adhesion molecule | Hs01113367_g1 |
| FAS | Fas cell surface death receptor | Hs00236330_m1 |
| FASLG | Fas ligand | Hs00181226_g1 |
| GADD45G | growth arrest and DNA damage inducible  | Hs02566147_s1 |
| HDAC4 | histone deacetylase 4 | Hs01041648_m1 |
| HDAC 9 | histone deacetylase 9 | Hs01081548_g1 |
| ICAM1 | intercellular adhesion molecule 1 | Hs00164932_m1 |
| ICAM2 | intercellular adhesion molecule 2 | Hs00609563_m1 |
| ICAM3 | intercellular adhesion molecule 3 | Hs00913466_g1 |
| ICAM4 | intercellular adhesion molecule 3 | Hs05017468_s1 |
| IFIT1 | interferon induced protein with tetratricopeptide repeats 1 | Hs01911452_s1 |
| IFIT2 | interferon induced protein with tetratricopeptide repeats 2 | Hs01584837_s1 |
| IFIT3 | interferon induced protein with tetratricopeptide repeats 3 | Hs01922752_s1 |
| IFITM1 | interferon induced transmembrane protein 1 | Hs00705137_s1 |
| IFITM2 | interferon induced transmembrane protein 2 | Hs00829485_sH |
| IFITM3 | interferon induced transmembrane protein 3 | Hs04194512_g1 |
| IFITM5 | interferon induced transmembrane protein 5 | Hs00416846_m1 |
| IFNAR1 | interferon alpha and beta receptor subunit 1 | Hs01066116_m1 |
| IFNAR2 | interferon  and  receptor subunit 2 | Hs01022059_m1 |
| IFNB1 | interferon beta 1 | Hs00277188_s1 |
| IFNG | interferon gamma | Hs00989291_m1 |
| IL1A | interleukin 1A | Hs00174092_m1 |
| IL1B | interleukin 1B | Hs01555410_m1 |
| IL10 | interleukin 10 | Hs00961619_m1 |
| IL18R1 | interleukin 18 receptor 1 | Hs00977691_m1 |
| IL18RAP | interleukin 18 receptor accessory protein | Hs00187256_m1 |
| IL2 | interleukin 2 | Hs00174114_m1 |
| IL2RB | interleukin 2 receptor  | Hs01081697_m1 |
| IL2RG | interleukin 2 receptor  | Hs00415671_m1 |
| IL4R | interleukin 4 receptor | Hs00965057_m1 |
| IL6 (IFNB2) | interleukin 6 | Hs00174131_m1 |
| IL6R | interleukin 6 receptor | Hs01075664_m1 |
| IL8 | interleukin 8 | Hs00174103_m1 |
| IRF3 | interferon regulatory factor 3 | Hs01547282_m1 |
| IRF7 | interferon regulatory factor 7 | Hs01014809_g1 |
| IRF9 | interferon regulatory factor 3 | Hs00196051_m1 |
| ISG15 | ISG15 ubiquitin like modifier | Hs01921425_s1 |
| MAVS | mitochondrial antiviral signaling protein | Hs00920075_m1 |
| MALAT1 | metastasis associated lung adenocarcinoma transcript 1 | Hs00273907_s1 |
| MCAM (CD146) | melanoma cell adhesion molecule |  |
| MEFV | MEFV innate immuity regulator pyrin | Hs00925524_m1 |
| MRC1 (CD206) | macrophage mannose receptor 1 |  |
| MSR1 (SR-A) | macrophage scavenger receptor 1 |  |
| NAIP | NLR family apoptosis inhibitory protein | Hs03037952_m1 |
| NCAM1 | neural cell adhesion molecule 1 | Hs00941830_m1 |
| NCAM2 | neural cell adhesion molecule 2 | Hs01562296_m1 |
| NEAT1 | nuclear paraspeckle assembly transcript 1 | Hs01008264_s1 |
| NFATC2 | nuclear factor of activated T cells 2 | Hs00905451_m1 |
| NOD2 | nucleotide binding oligomerization domain containing 2 | Hs01550753_m1 |
| NOS2 | nitric oxide synthase 2 | Hs01075529_m1 |
| NOS3 | nitric oxide synthase 3 | Hs01574665_m1 |
| NLRC3 | NLR family CARD domain containing 3 | Hs01054713_m1 |
| NLRC4 | NLR family CARD domain containing 4 | Hs00368367_m1 |
| NLRC5 | NLR family CARD domain containing 5 | Hs01072143_m1 |
| NT5C1A | 5'-nucleotidase cytosolic IA | Hs00261369_m1 |
| OLR1 (LOX1) | oxidized low density lipoprotein receptor 1 |  |
| RIPK3 | receptor interacting serine/threonine kinase 3 | Hs00179132_m1 |
| RLR1 (DDX58) | RIG-like receptor 1 | Hs00204833_m1 |
| RLR2 (IFIH1) | RIG-like receptor 2 | Hs01070332_m1 |
| RLR3 (DHX58) | RIG-like receptor 3 | Hs00225561_m1 |
| ROCKI | MARCKS cis-regulating lncRNA promoter of cytokines and inflammation |  |
| SERPING1 |  |  |
| SLFN12L | schlafen family member 12 like | Hs04334088_m1 |
| SLFN5 | schlafen family member 5 | Hs00288058_m1 |
| SOX4 | SRY-box transcription factor 4 | Hs05029754_s1 |
| TGFA | transforming growth factor  | Hs00608187_m1 |
| TGFB2 | transforming growth factor  | Hs00234244_m1 |
| TGFBI | transforming growth factor  induced | Hs00932747_m1 |
| TLR1 (LPRS) |  |  |
| TLR2 | Toll-like receptor 2 | Hs02621280_s1 |
| TLR8 | Toll-like receptor 8 | Hs00152972_m1 |
| TLR9 | Toll-like receptor 9 | Hs00152973_m1 |
| TLR10 (CD290) | Toll-like receptor 10 |  |
| TNF (TNFSF2) | tumour necrosis factor  | Hs00174128_m1 |
| TWIST2 | twist family bHLH transcription factor 2 | Hs02379973_s1 |
| VCAM | vascular cell adhesion molecule 1 | Hs01003372_m1 |
| VEGFA | vascular endothelial growth factor A | Hs00900055_m1 |
|  |  |  |
| 18S | 18S-RNA | Hs9999901_s1 |
| GAPDH | glyceraldehyde-3-phosphate dehydrogenase | Hs99999905_m1 |
| HPRT1 | hypoxanthine phosphoribosyltransferase 1 | Hs01003267_m1 |

Expression levels measured by qPCR were quantified as delta-delta-Ct values, determined by the Ct value of a candidate RNA minus the Ct of the reference gene.

***Statistical analyses***

*Cell culture experiments*: Statistical data analyses were done using *IBM SPSS Statistics 24* or *GraphPad* software. Descriptive statistics include absolute and relative frequencies for categorial variables and mean and standard deviation, median, and range for quantitative measurements. For inter-group comparisons Student’s t-test or the χ2 test was used for quantitative or categorical variables, respectively. P-values ≤ 0.05 are considered significant, and no Bonferroni adjustment has been performed.

*Human molecular genetics*: Genome-wide association analyses of healthy samples versus samples with inflammatory, metabolic, and/or cardiovascular conditions were performed via logistic regression analysis implemented in *snptest v2.5.2*. For sensitivity analysis samples were stratified by sex. Summary-level results were meta-analyzed with *METAL* (*Willer CJ, Li Y, Abecasis GR. METAL: fast and efficient meta- analysis of genomewide association scans. Bioinformatics. 2010;26:2190–1*) using the classical approach which utilizes the effect size estimates and standard errors. Only variants with an imputation quality > 30% and Hardy-Weinberg equilibrium p-value > 0.0001 were included in the meta-analysis. Variants with p-value < 5×10-8 (the standard threshold) were considered to be genome-wide significant.

**References regarding the methods**

1. M. C. Gundry *et al.*, Highly Efficient Genome Editing of Murine and Human Hematopoietic Progenitor Cells by CRISPR/Cas9. *Cell Rep* 17, 1453-1461 (2016).

2. L. Brunetti, M. C. Gundry, A. Kitano, D. Nakada, M. A. Goodell, Highly Efficient Gene Disruption of Murine and Human Hematopoietic Progenitor Cells by CRISPR/Cas9. *J Vis Exp* (2018).

3. M. Kespohl *et al.*, Protein modification with ISG15 blocks coxsackievirus pathology by antiviral and metabolic reprogramming. *Sci Adv* 6, eaay1109 (2020).

4. S. Pinkert *et al.*, Prevention of cardiac dysfunction in acute coxsackievirus B3 cardiomyopathy by inducible expression of a soluble coxsackievirus-adenovirus receptor. *Circulation* 120, 2358-2366 (2009).

5. D. Werk *et al.*, Combination of soluble coxsackievirus-adenovirus receptor and anti-coxsackievirus siRNAs exerts synergistic antiviral activity against coxsackievirus B3. *Antiviral Res* 83, 298-306 (2009).

6. H. Fechner *et al.*, Coxsackievirus B3 and adenovirus infections of cardiac cells are efficiently inhibited by vector-mediated RNA interference targeting their common receptor. *Gene Ther* 14, 960-971 (2007).

7. L. Suckau *et al.*, Long-term cardiac-targeted RNA interference for the treatment of heart failure restores cardiac function and reduces pathological hypertrophy. *Circulation* 119, 1241-1252 (2009).

8. A. Dobin *et al.*, STAR: ultrafast universal RNA-seq aligner. *Bioinformatics* 29, 15-21 (2013).

9. S. Anders, P. T. Pyl, W. Huber, HTSeq--a Python framework to work with high-throughput sequencing data. *Bioinformatics* 31, 166-169 (2015).

10. S. Anders, W. Huber, Differential expression analysis for sequence count data. *Genome Biol* 11, R106 (2010).

11. D. A. Barbie *et al.*, Systematic RNA interference reveals that oncogenic KRAS-driven cancers require TBK1. *Nature* 462, 108-112 (2009).

12. A. Subramanian *et al.*, Gene set enrichment analysis: a knowledge-based approach for interpreting genome-wide expression profiles. *Proc Natl Acad Sci U S A* 102, 15545-15550 (2005).

13. A. Liberzon *et al.*, Molecular signatures database (MSigDB) 3.0. *Bioinformatics* 27, 1739-1740 (2011).

**Supplemental Figure S1A**

CRISPR-Cas9 target region to generate menRNA cells


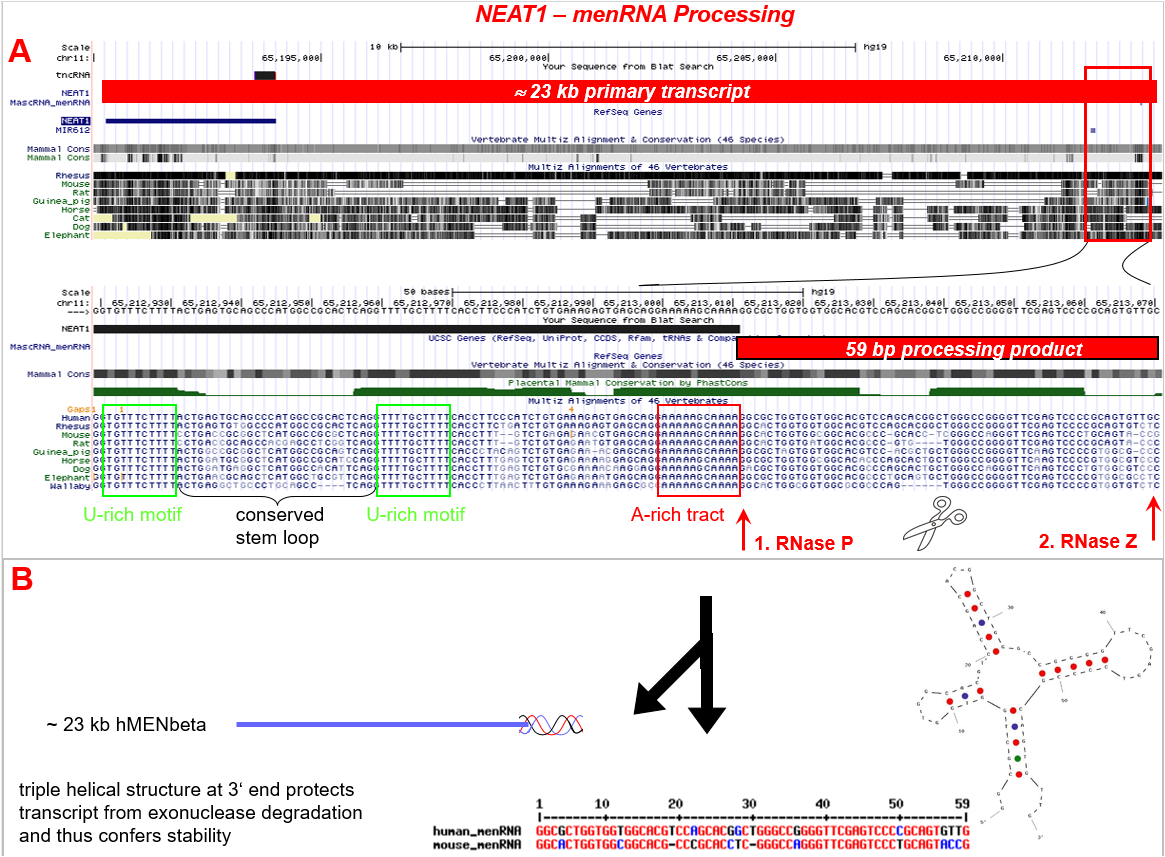


**Supplemental Figure S1B**

CRISPR-Cas9 target region to generate mascRNA cells


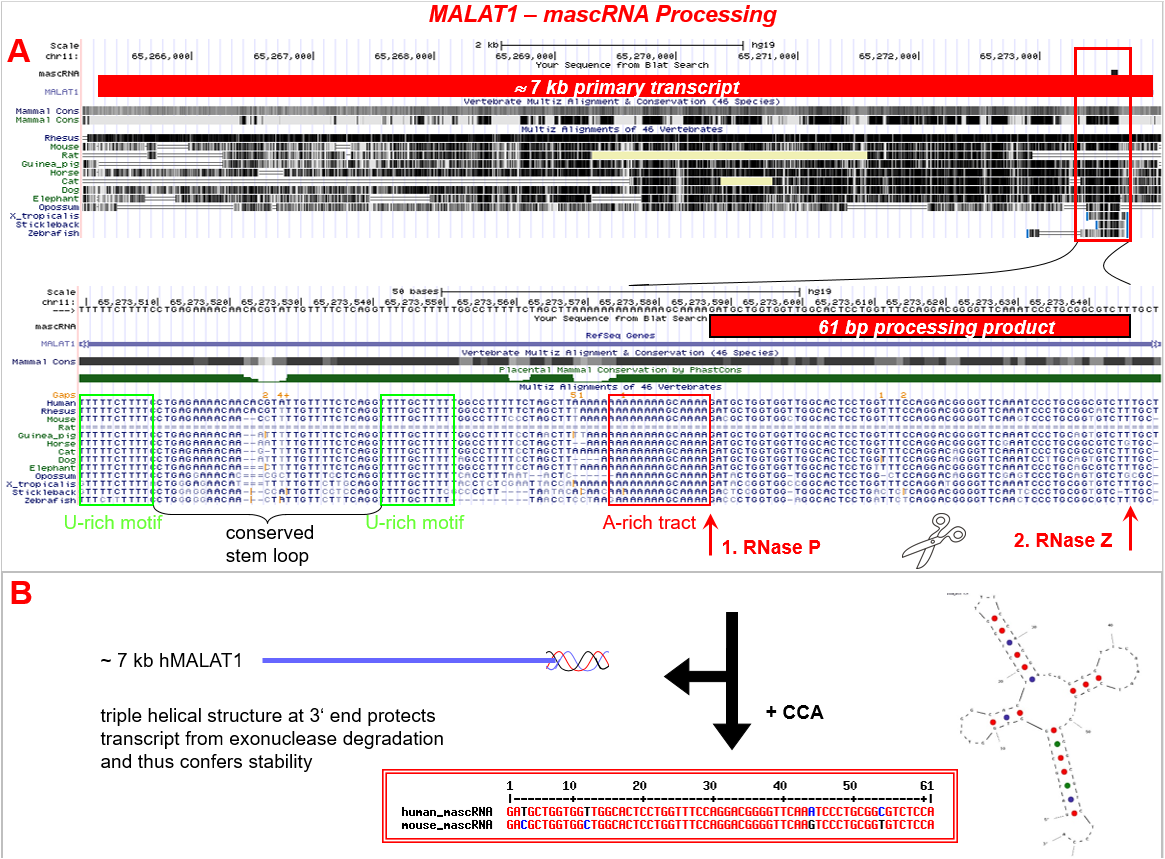


**Supplemental Figure S1C**

Recombinant expression and Northern blot analysis of menRNA


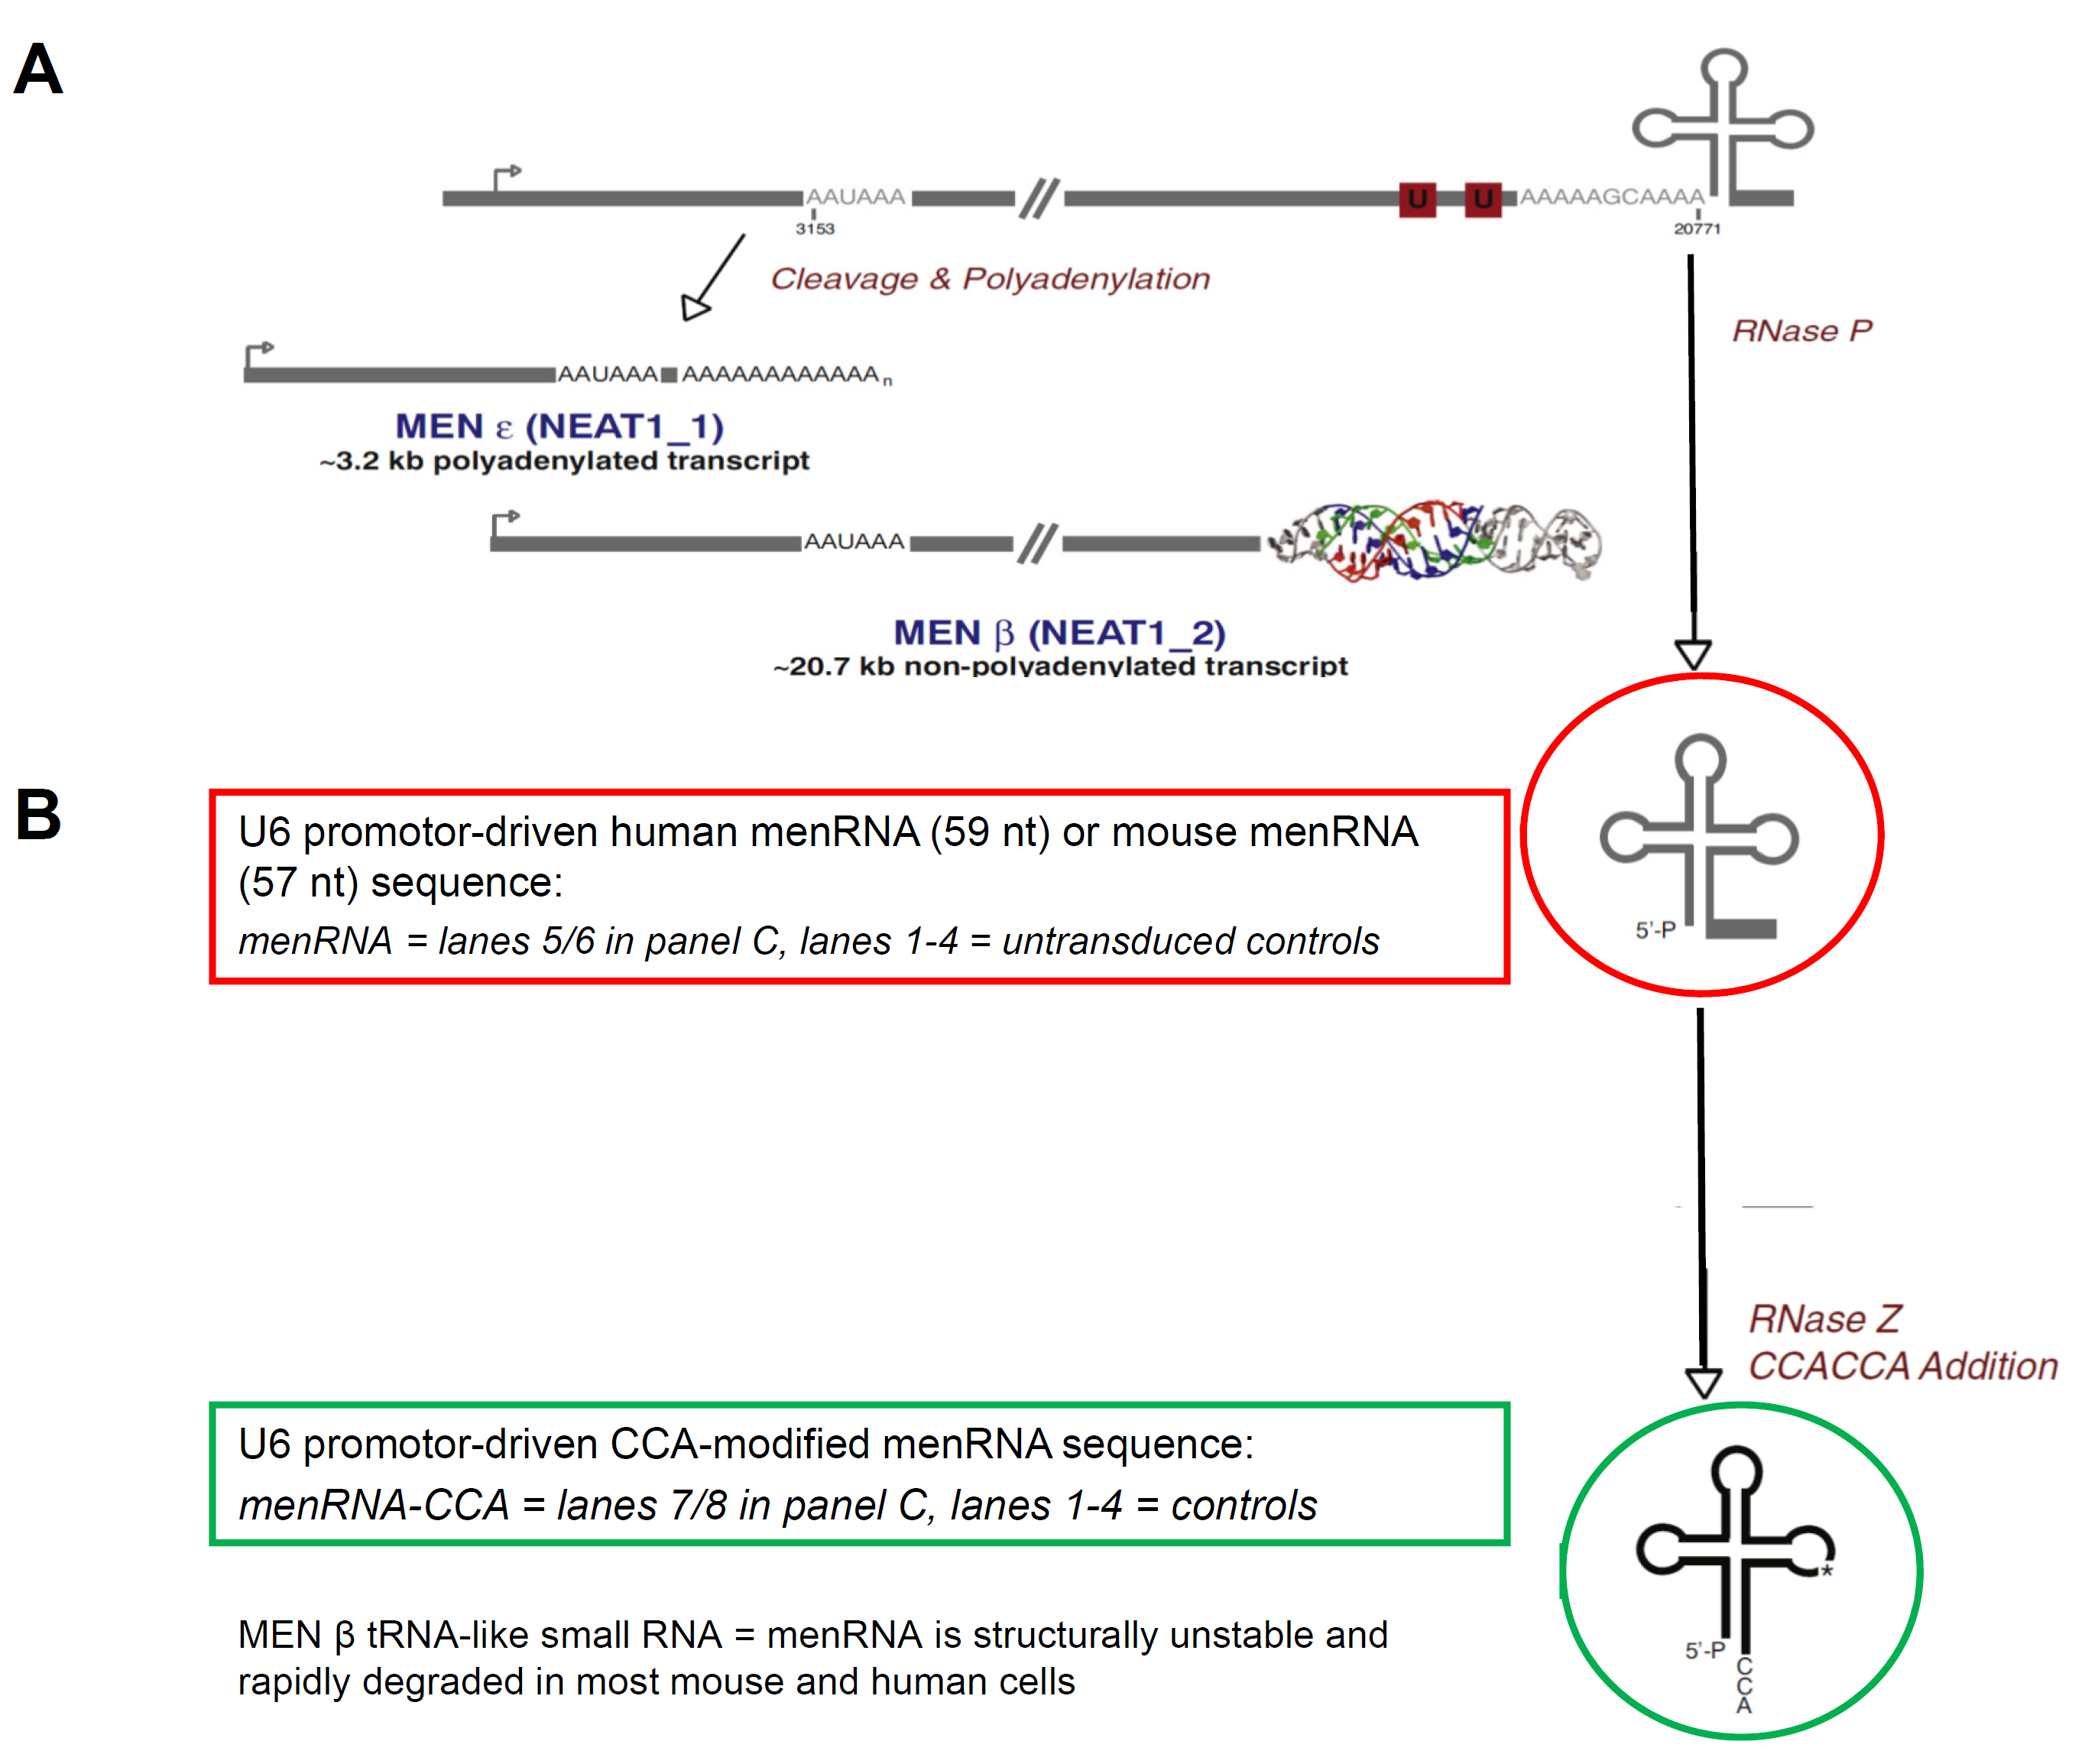


**
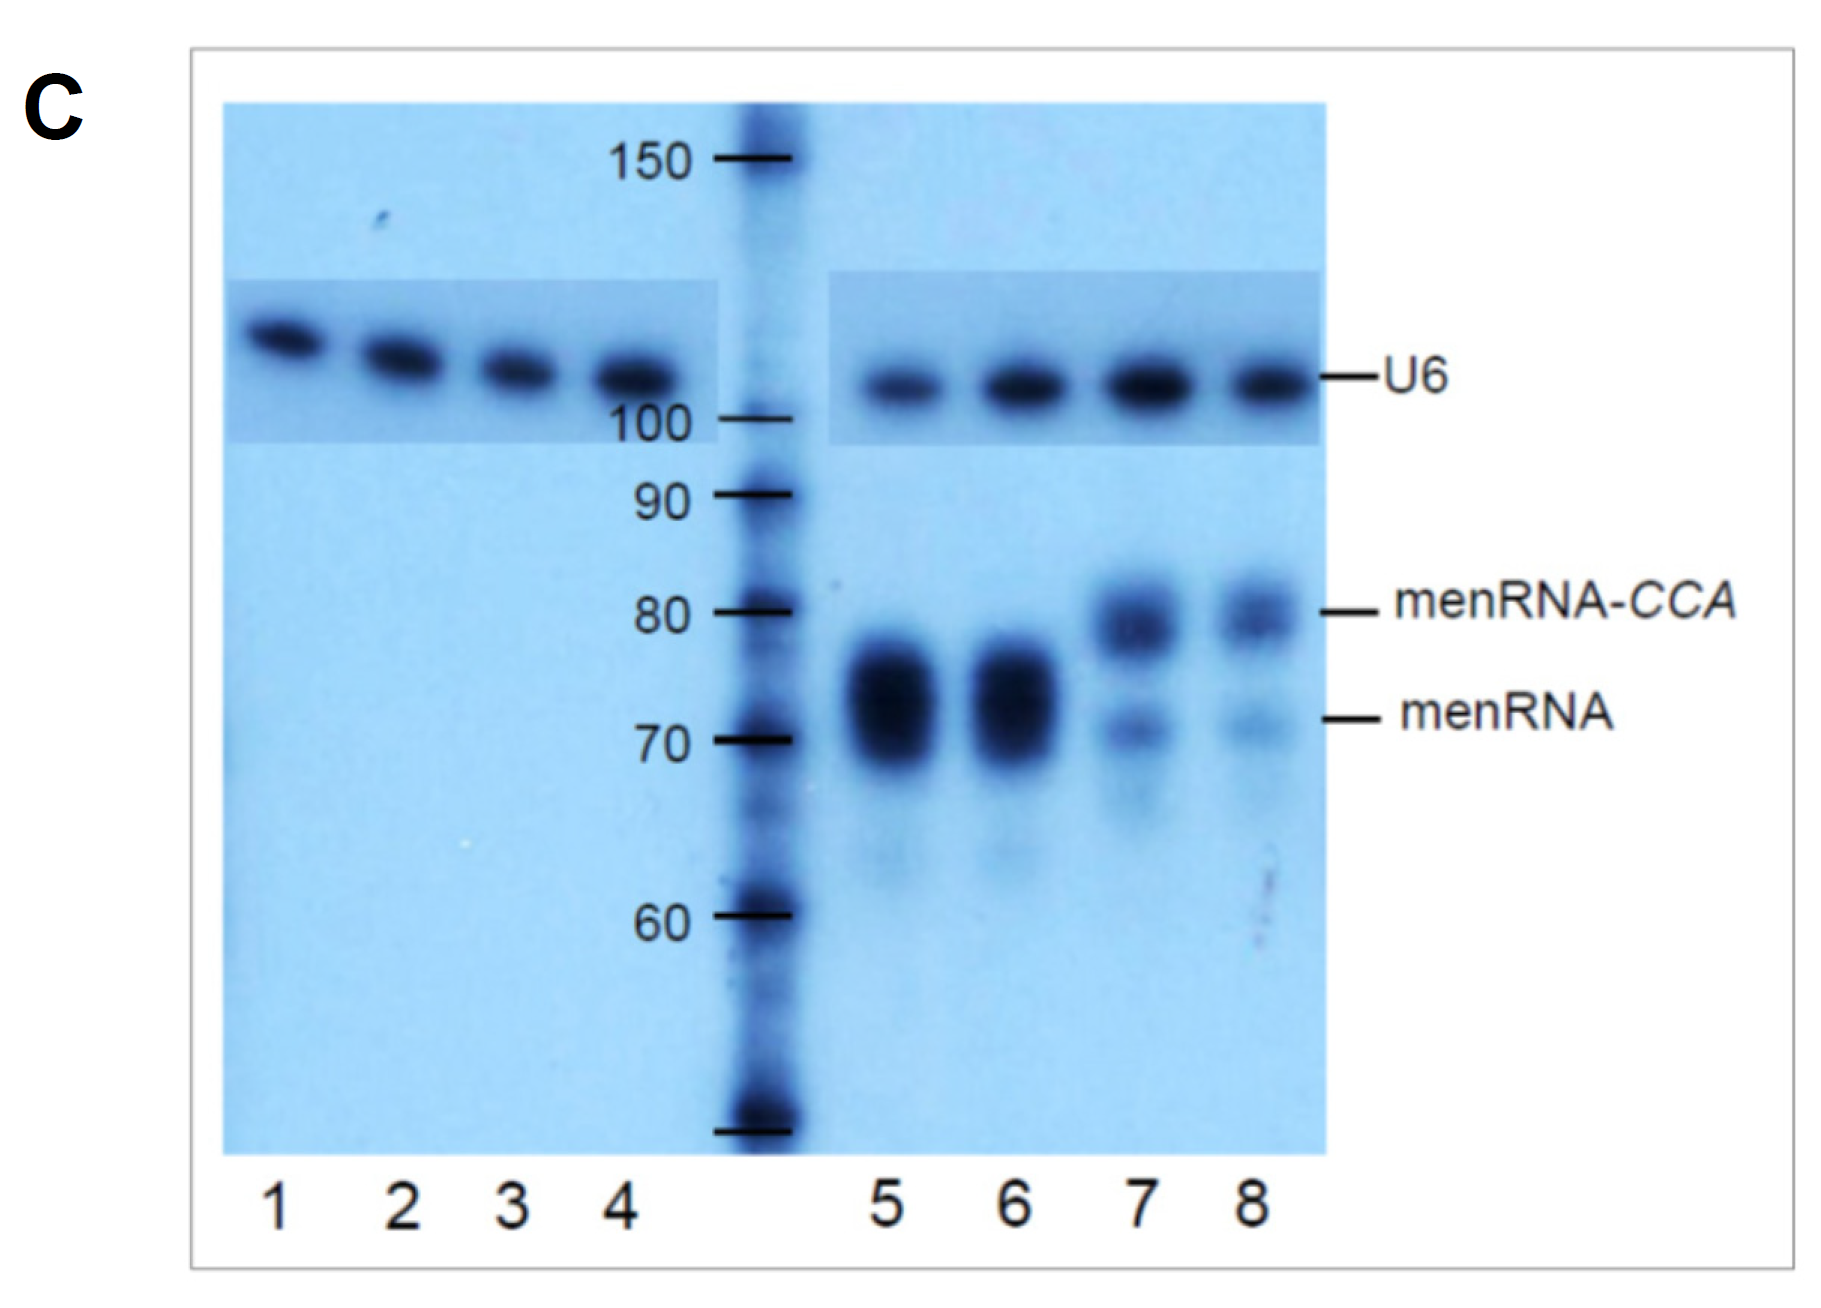
**

*Panel A*: Locations of two long primary transcripts from the *NEAT1* locus with size 3.7 kb and poly A tail (MEN ), or size ≈23 kb and triple helical tail (MEN ). A tRNA-like ’menRNA’ is enzymatically generated at the far 3’ end of *NEAT1*. *Panel B*: Outline of the enzymatic biosynthesis of menRNA. This product is posttranscriptionally modified by CCA or CCACCA addition with CCACCA tagging it for rapid degradation (Wilusz *et al.* tRNAs marked with CCACCA are targeted for degradation. *Science* 2011;334:817-821 | Kuhn *et al.* On-enzyme refolding permits small RNA and tRNA surveillance by the CCA-adding enzyme. *Cell* 2015;160:644-658). *Panel C*: Northern blot analysis of HEK 293 cells transfected with recombinant adenovectors expressing menRNA (lanes 5/5) or menRNA±CCA (lanes 7/8). Lanes 1-4 show untransduced HEK 293 control cells. In these and several others including THP-1 cells there was no detectable menRNA. U6 RNA was employed as loading control.

**Supplemental Figure S1D**

Immunomodulating effects of recombinant *menRNA* in murine macrophages

Strict evolutionary conservation of the menRNA sequence, as opposed to considerable variability in the other regions of the *NEAT1* locus, suggests important cellular functions of the tRNA-like menRNA. Since we are aware of no pharmacological or other approach to selectively enhance menRNA formation from its precursor *NEAT1*, we employed recombinant menRNA vectors (Suppl. Fig. S1C) as a first experimental approximation to enhancement of endogenous menRNA formation.

In murine RAW monocytes-macrophages, recombinant menRNA or menRNA-*CCA* did not significantly alter the expression of its parent transcript *NEAT1*. As shown above, however, menRNA±*CCA* induced five genes (CCL5, IFIT1-3, IFIH1) directly. Of interest, FAS induction occurred only with menRNA-*CCA*, but not unmodified menRNA. IL-6 was suppressed by both.

Although recombinant menRNA overexpression is certainly an imperfect substitute for ’physiological’ enhancement of its endo-genous enzymatic formation, its observed capacity to induce the innate immune sensors IFIT1-3 and the chemokine CCL5 suggests immunoregulatory functions menRNA in monocytes where its precursor *NEAT1* is significantly enriched as compared to other immune cell subpopulations (Gast *et al.* Immune system-mediated atherosclerosis caused by deficiency of long non-coding RNA *MALAT1 i*n ApoE-/-mice. *Cardiovasc Res* 2019;115:302-314). The fact that FAS is differentially affected by menRNA±*CCA* does suggest a degree of specificity of interaction of the recombinant menRNAs with their cellular targets.

**Supplemental Figure S1E**

Requirement of Northern blot analysis for *mascRNA* detection and quantification

Northern blot analysis shows very low abundance of mascRNA below the detection limit in all investigated human solid organs (panel B), contrasting with high levels in circulating human immune cells (PBMCs). Panel C displays the Northern-based mascRNA quantification in FACS-sorted human PBMC subfractions, with highest abundance in CD14+ monocytes. Reproduced by permission from Gast *et al*. Long noncoding RNA *MALAT1*-derived mascRNA is involved in cardiovascular innate immunity. J Mol Cell Biol 2016;8:178-181).

In a previous translational study of post-myocardial infarction patients, mascRNA abundance in circulating immune cells was quantitated in a subgroup of patients and controls for which sufficient RNA was available for Northern blot analysis. Reproduced by permission from Gast *et al.* Immune system-mediated atherosclerosis caused by deficiency of long non-coding RNA *MALAT1 i*n ApoE-/-mice. *Cardiovasc Res* **115**, 302-314 (2019).

**Supplemental Figure S2**

Structure prediction for residual sequences in menRNA and mascRNA cells

Panel A

residual menRNA (human)

5’-ggcgctggtg gtggc*acgtc cagcacggct gggccggggt tcgagtcccc gcagtgttg*-3’


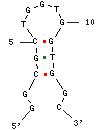

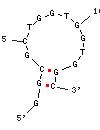

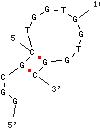

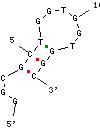

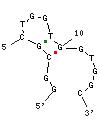

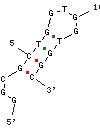


Panel B

residual mascRNA (human)

5‘-GATGCTGGTGGTTGGCACTCCTGGTTTCCAGGA*CGGGGTTCAAATCCCTG*CGGCGTCT-3‘


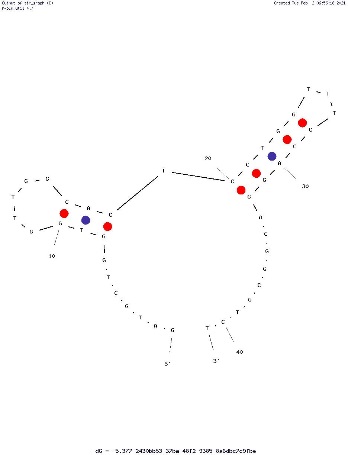

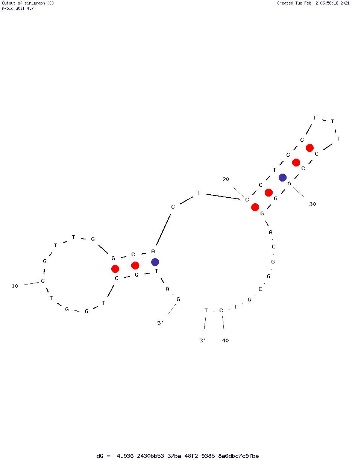

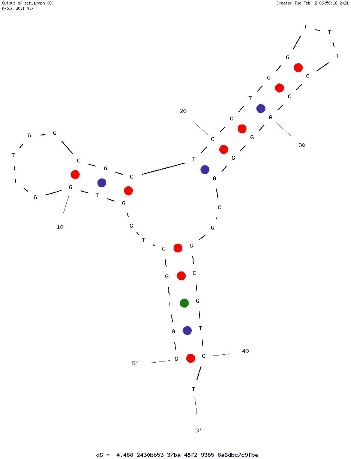

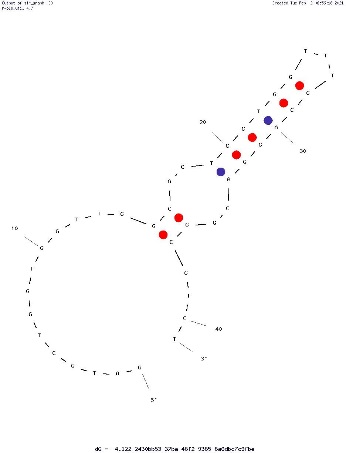


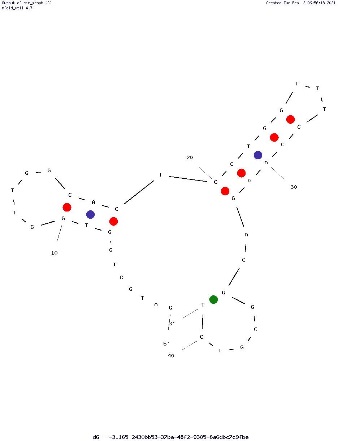

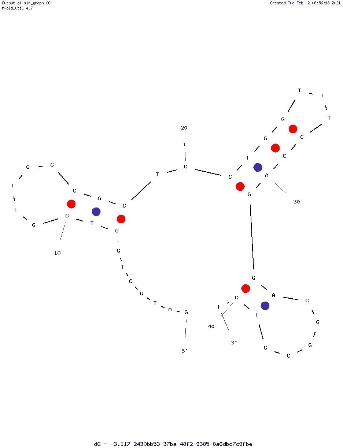

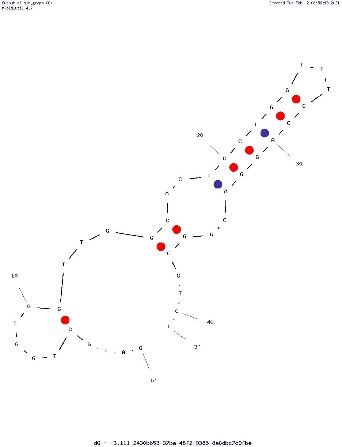

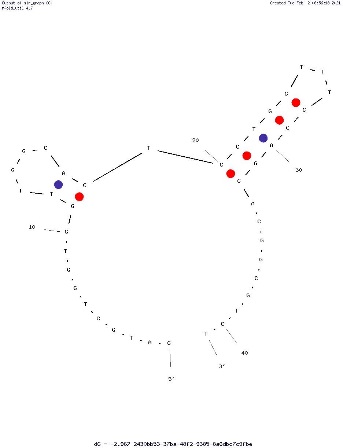


Possible structures acquired by sequence residues in menRNA and mascRNA clones as predicted by OligoAnalyzer (IDT) <https://eu.idtdna.com/calc/analyzer>. None of these structures has resemblance with classical or atypical tRNAs.

**Supplemental Figure S3A**

*In vitro* transcription of single-guide RNAs


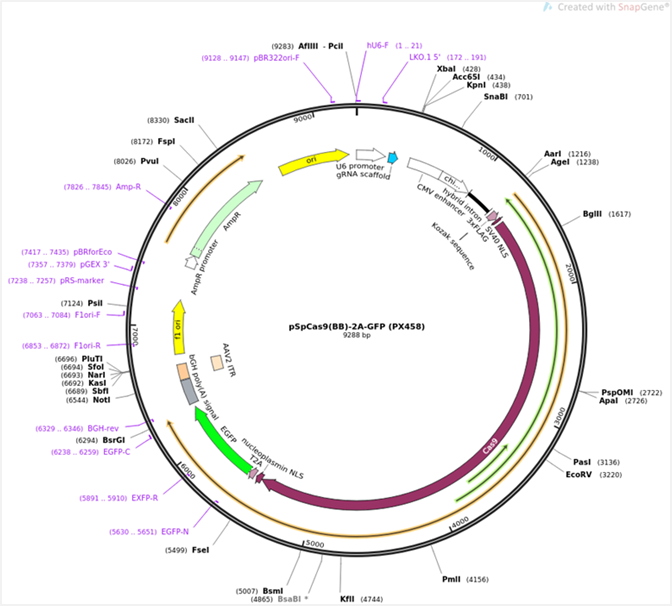


**Supplemental Figure S3B**

PCR analysis of menRNA and mascRNA cells


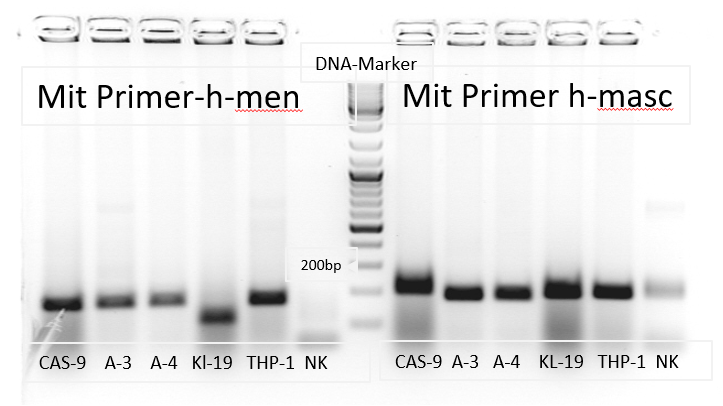


**Supplemental Figure S4**

Known sequence polymorphisms in the human menRNA and mascRNA sequences


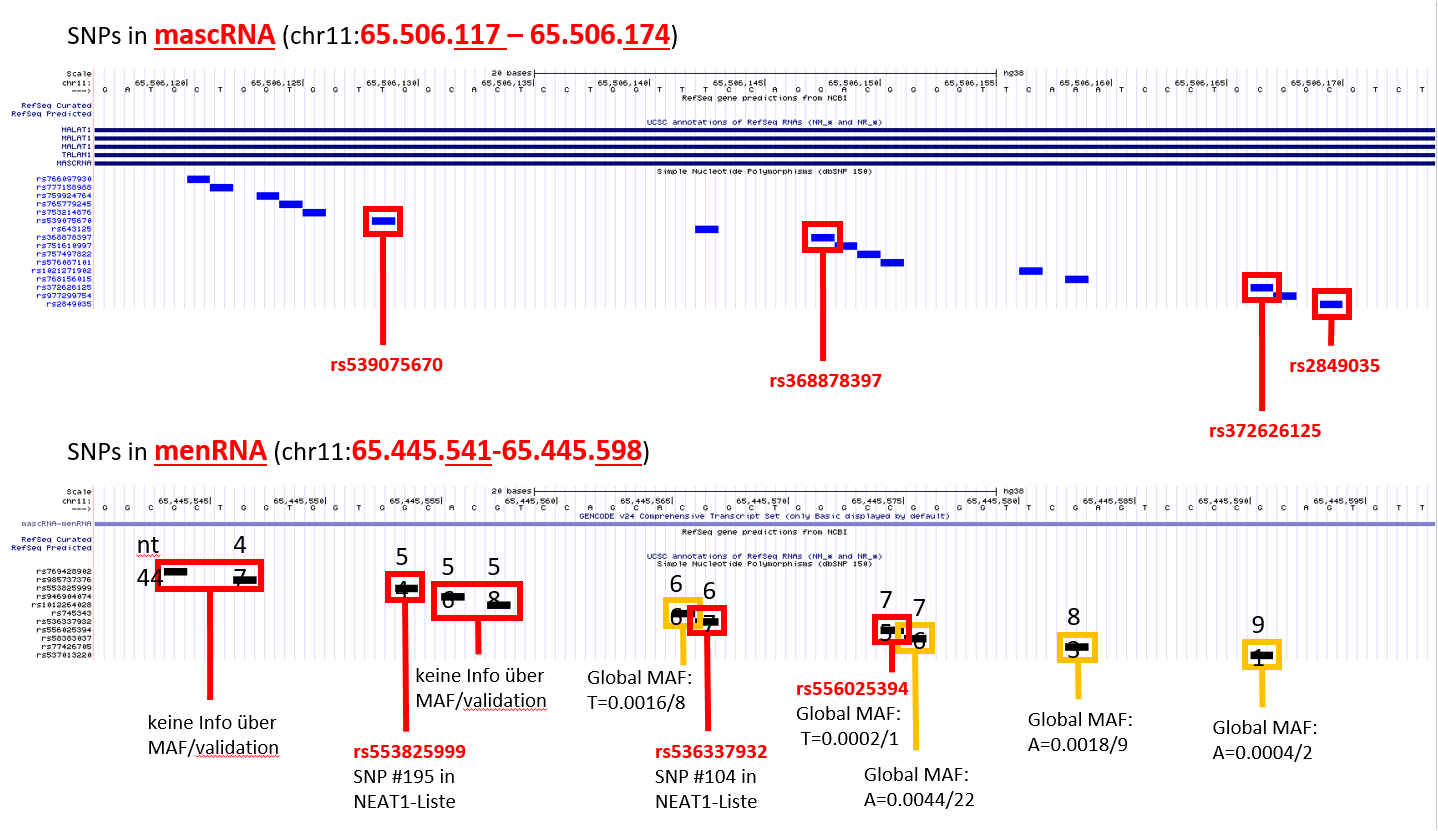


**Supplemental Figure S5**

Outline regarding SNPs analyses in SHIP cohorts


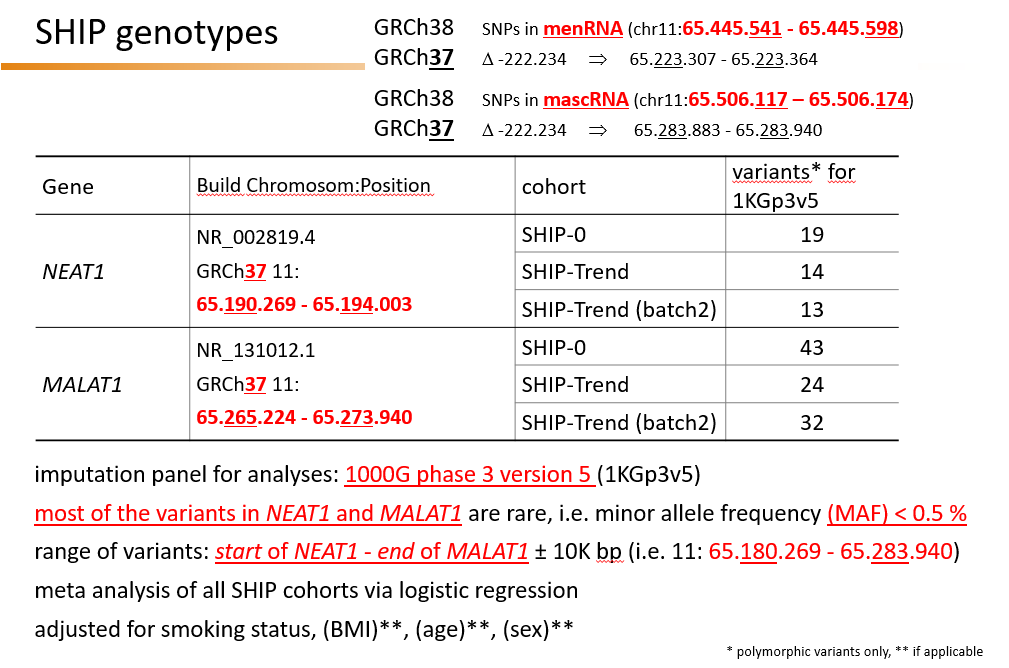


Genetic heterogeneity of the *NEAT1-MALAT1* region in humans

SNPs available from the SHIP study for the *NEAT1-MALAT1* region, with their respective positions, are shown in Suppl. Fig. S6AB. No full sequence data for the specific target regions of the current study, *i.e.* mascRNA and menRNA, are currently available for the SHIP general population or for any patient cohorts, although several SNP are known to occur mascRNA and menRNA (Suppl. Fig. 4). Consistent with prior findings in cell culture and animal models (Gast *et al*. Immune system-mediated atherosclerosis caused by deficiency of long non-coding RNA *MALAT1* in ApoE-/- mice. Cardiovasc Res 2019;115: 302-314 | Cremer *et al.* Hematopoietic deficiency of the long noncoding RNA *MALAT1* promotes atherosclerosis and plaque inflammation. Circulation 2019;139:1320-1334), one *MALAT1* SNP with very low minor allele frequency (MAF=0.01) was associated (p=0.0062) with systemic low level inflammation (CRP>3.0 mg/L) (Suppl. Fig. S7). This SNP is located upstream of *MALAT1* in the promotor region regulating *MALAT1* expression (Suppl. Fig. S6A). Further, there was an association (p<0.01) of eight SNPs (low MAF=0.09 for all) within the *NEAT1* region with the phenotype of BMI >35 kg/m2 and LDL >164 mg/dl (Suppl. Fig. S6B).

**Supplemental Figure S6A**

Positions of *MALAT1* region SNPs analyzed in SHIP cohorts


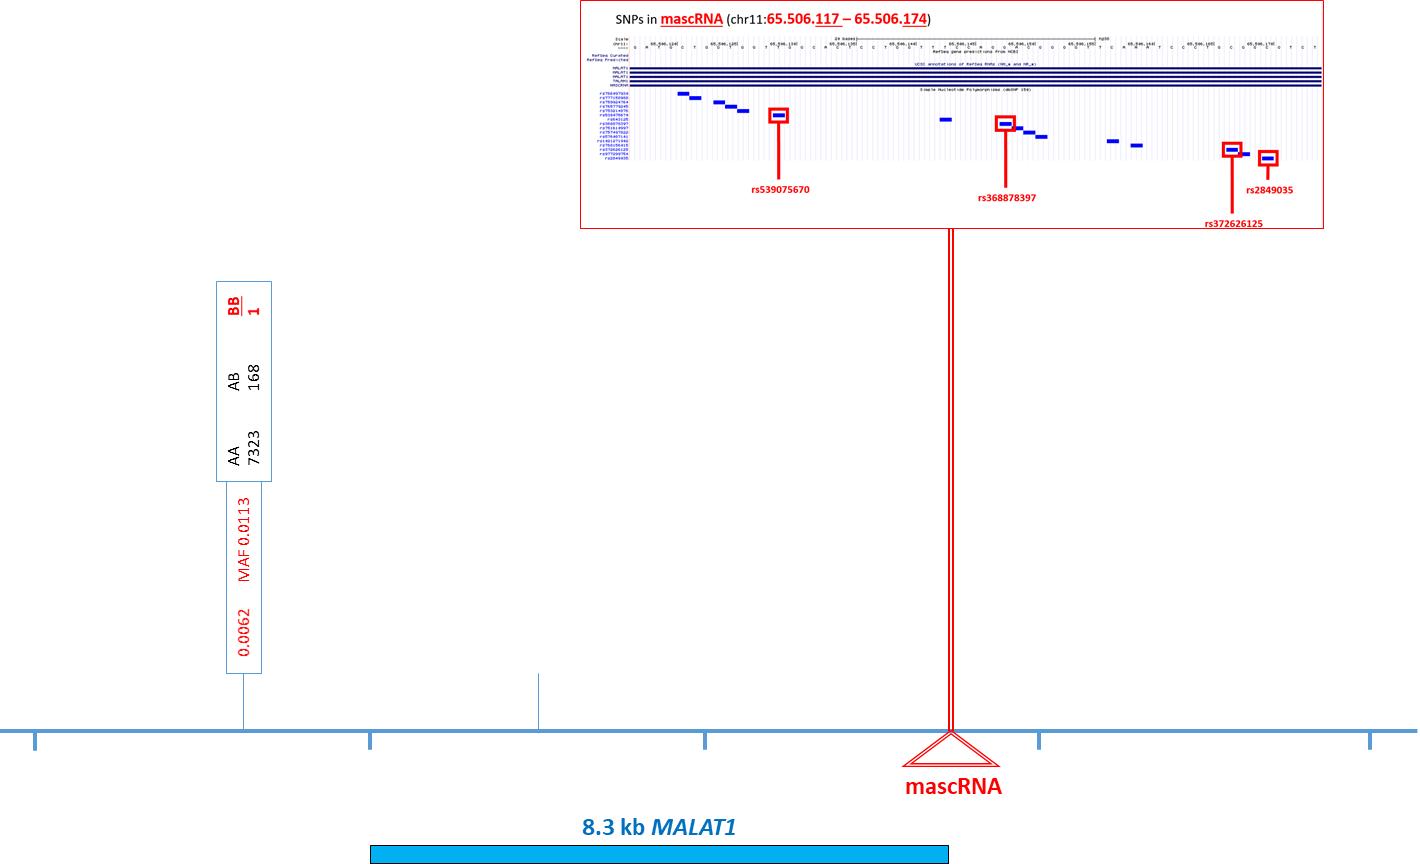


**Supplemental Figure S6B**

Positions of *NEAT1* region SNPs analyzed in SHIP cohorts


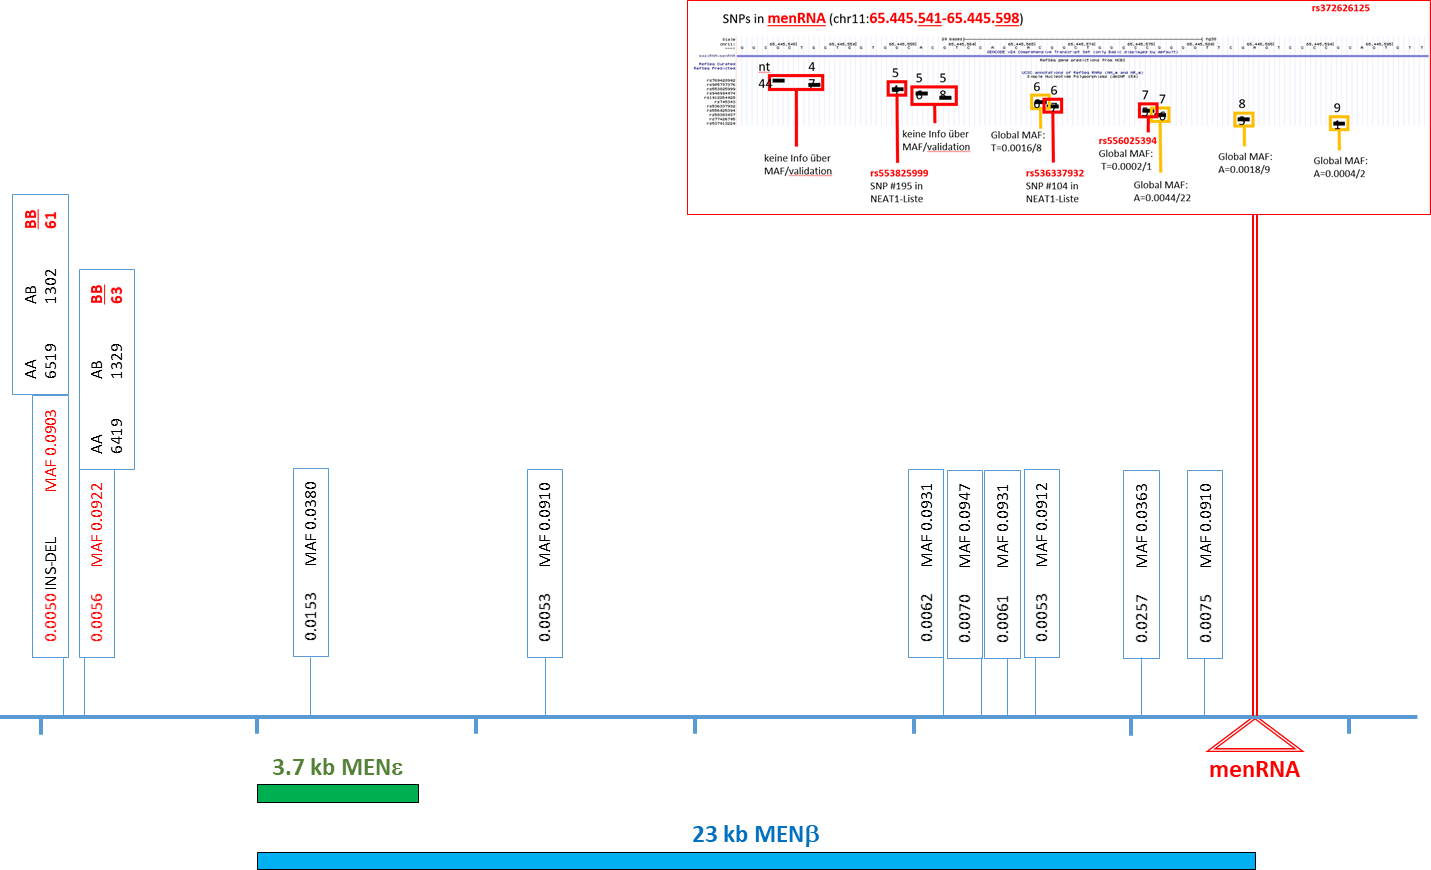


**Supplemental Figure S7A**

Human population genetic data

**Supplemental Figure S8A**

Transduction of recombinant GFP-expressing adenovirus into CRISPR-Cas9-generated defective human macrophages


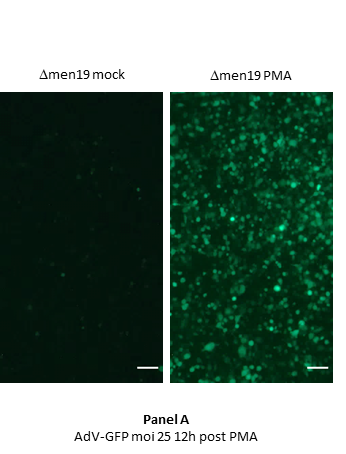


**Supplemental Figure S8B**

Transduction of human coxsackievirus B3 into CRISPR-Cas9-generated defective human macrophages


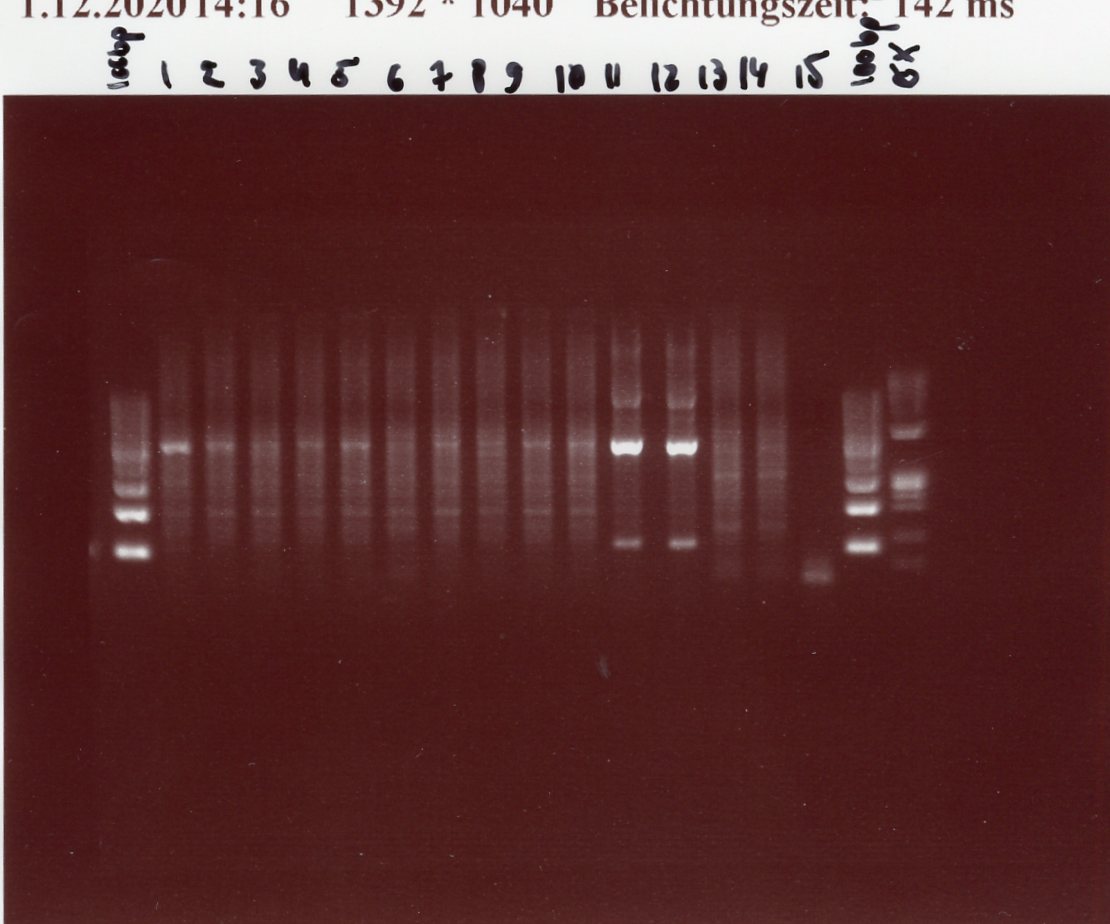


Marker: Øx bzw 100bp Peqlab

lane 1: men19 cells + 30moi CVB3 (18.11.2020)

lane 2: masc4 cells + 30moi CVB3 (18.11.2020)

lane 3: masc3 cells + 30moi CVB3 (18.11.2020)

lane 4: cas 9 cells + 30moi CVB3 (18.11.2020)

lane 5: THP-1 cells + 30moi CVB3 (18.11.2020)

lane 6: men19 cells + 30moi CVB3 (24.11.2020)

lane 7: masc4 cells + 30moi CVB3 (24.11.2020)

lane 8: masc3 cells + 30moi CVB3 (24.11.2020)

lane 9: cas 9 cells + 30moi CVB3 (24.11.2020)

lane10: THP-1 cells + 30moi CVB3 (24.11.2020)

lanes 11+12: Vero cells + 30moi CVB3 (positive control)

lanes 13+14: Vero cells w/o CVB3 (negative control)

lane 15: water control PCR reagents

Expected fragment size for CVB3 replicative intermediates: 478bp

**Supplemental Figure S9A**

Anomalous expression of innate immune sensor molecules and interferon-induced genes in menRNA and mascRNA macrophages

Upon PMA-induced differentiation of menRNA and mascRNA monocytes into macrophages (Suppl. Fig. S8A), these displayed further disturbances of innate immune regulation under baseline conditions including constitutive induction of the cytosolic innate immune sensor molecules RLR1 (DExD/H-box helicase DDX58), RLR2 (IFIH1; MDA-5), RLR3 (RNA helicase DHX58; LGP2), and MAVS (mitochondrial antiviral signaling protein). In menRNA macrophages several interferon (IFN) system genes were also constitutively upregulated up to ~15-fold: the IFN regulatory factors IRF3, IRF7, and IRF9; IFN-stimulated gene ISG15; IFN-induced transmembrane proteins IFITM1 and IFITM3 In DmenRNA macrophages several interferon (IFN) system genes were also constitutively upregulated up to ~15-fold: the IFN regulatory factors IRF3, IRF7, and IRF9; IFN-stimulated gene ISG15; IFN-induced transmembrane proteins IFITM1, IFITM3; and GVINP1. Bar graphs show means ± SE from three biological replicates.

**Supplemental Figure S9B**

FACS analysis of menRNA and mascRNA monocyte to M0 macrophage transition


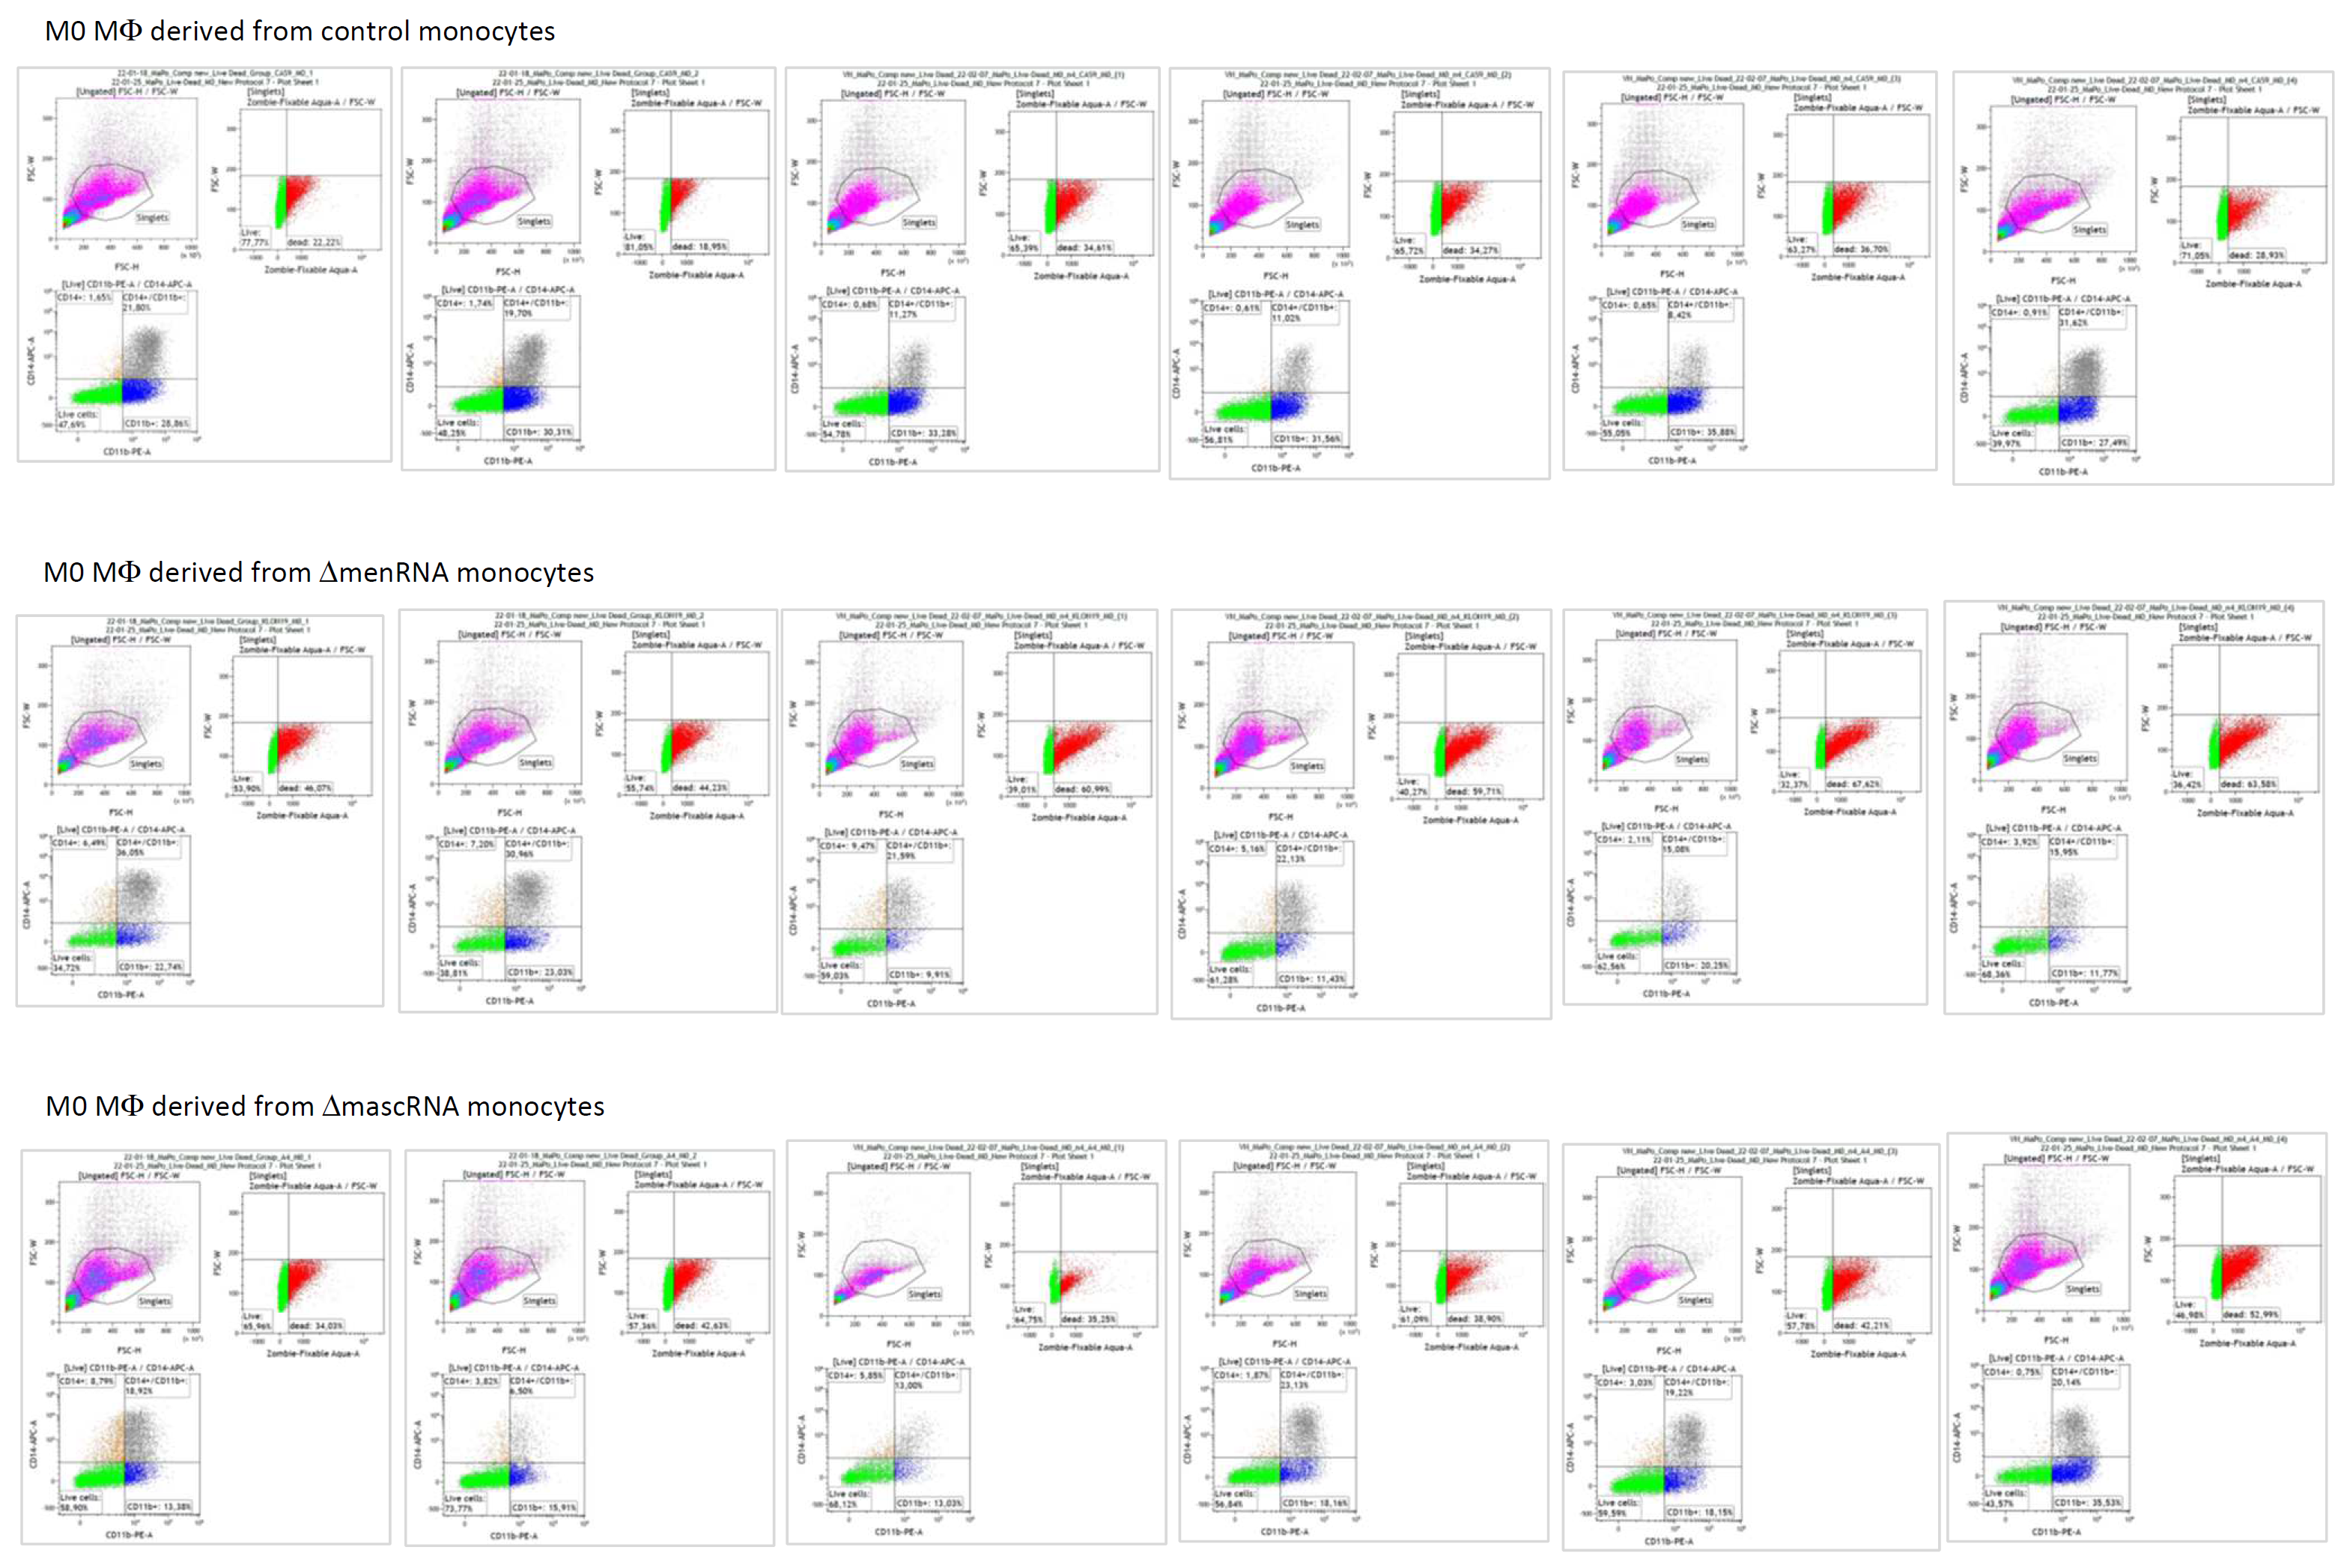


**Supplemental Table S1**

RNA-seq FPKM data for menRNA monocytes

S1A - Innate immune sensors

| BASELINE |  |  | control | men19 | ratio |
| --- | --- | --- | --- | --- | --- |
| CIITA | class II major histocompatibility complex transactivator | 6,669 | | 115,166 | 17,270 |
| NOD2 | nucleotide binding oligomerization domain containing 2 | 21,117 | | 157,454 | 7,456 |
| NLRC5 | NLR family CARD domain containing 5 | 230,068 | | 870,944 | 3,786 |
| TLR2 | toll like receptor 2 | 379,000 | | 1299,218 | 3,428 |
| PYCARD | PYD and CARD domain containing | 368,997 | | 147,557 | 0,400 |
| CARD10 | caspase recruitment domain family member 10 | 33,343 | | 8,997 | 0,270 |
| NAIP | NLR family apoptosis inhibitory protein | 54,460 | | 8,997 | 0,165 |
| NLRC4 | NLR family CARD domain containing 4 | 33,343 | | 5,398 | 0,162 |
| MEFV | MEFV innate immuity regulator, pyrin | 240,071 | | 32,390 | 0,135 |
| NLRC3 | NLR family CARD domain containing 3 | 185,610 | | 14,396 | 0,078 |

| LPS100 |  | control | men19 | ratio |
| --- | --- | --- | --- | --- |
| BOK | BCL2 family apoptosis regulator BOK | 2,404 | 17,473 | 7,269 |
| NOD2 | nucleotide binding oligomerization domain containing 2 | 68,505 | 321,171 | 4,688 |
| FAM129C | niban apoptosis regulator 3 | 2,404 | 9,985 | 4,154 |
| NLRC5 | NLR family CARD domain containing 5 | 292,050 | 1161,542 | 3,977 |
| PYCARD | PYD and CARD domain containing | 760,771 | 371,926 | 0,489 |
| RIPK3 | receptor interacting serine/threonine kinase 3 | 137,011 | 34,114 | 0,249 |
| NAIP | NLR family apoptosis inhibitory protein | 69,707 | 16,641 | 0,239 |
| CARD14 | caspase recruitment domain family member 14 | 4,807 | 0,832 | 0,173 |
| TLR1 | toll like receptor 1 | 104,561 | 15,809 | 0,151 |
| NLRC4 | NLR family CARD domain containing 4 | 63,698 | 6,656 | 0,104 |
| MEFV | MEFV innate immuity regulator, pyrin | 301,664 | 26,626 | 0,088 |
| MPEG1 | macrophage expressed 1 | 212,728 | 16,641 | 0,078 |
| TLR8 | toll like receptor 8 | 32,450 | 2,496 | 0,077 |
| TLR10 | toll like receptor 10 | 10,817 | 0,832 | 0,077 |
| NLRC3 | NLR family CARD domain containing 3 | 137,011 | 4,160 | 0,030 |
| TLR7 | toll like receptor 7 | 4,807 | 0,000 |  |

S1B – Transcription and nuclear factors, epigenetic modifiers

| BASELINE |  |  | control | men19 | ratio |
| --- | --- | --- | --- | --- | --- |
| GDAP1L1 | ganglioside induced differentiation associated protein 1 like 1 | 0,000 | | 17,995 |  |
| HDAC11 | histone deacetylase 11 | 0,000 | | 3,599 |  |
| GCM1 | glial cells missing transcription factor 1 | 0,000 | | 8,098 |  |
| SIM1 | SIM bHLH transcription factor 1 | 0,000 | | 8,098 |  |
| CCPG1 | cell cycle progression 1 | 52,238 | | 556,936 | 10,662 |
| NPDC1 | neural proliferation, differentiation and control 1 | 4,446 | | 44,987 | 10,119 |
| MTURN | maturin, neural progenitor differentiation regulator homolog | 24,452 | | 233,931 | 9,567 |
| RGCC | regulator of cell cycle | 6,669 | | 51,285 | 7,690 |
| GATA2 | GATA binding protein 2 | 21,117 | | 91,773 | 4,346 |
| NFATC2 | nuclear factor of activated T cells 2 | 563,499 | | 120,565 | 0,214 |
| METTL7B | methyltransferase like 7B | 166,716 | | 33,290 | 0,200 |
| TBX15 | T-box transcription factor 15 | 73,355 | | 13,496 | 0,184 |
| GATA6 | GATA binding protein 6 | 10,003 | | 1,799 | 0,180 |
| HIC1 | HIC ZBTB transcriptional repressor 1 | 5,557 | | 0,900 | 0,162 |
| SOX4 | SRY-box transcription factor 4 | 868,033 | | 134,960 | 0,155 |
| EBF1 | EBF transcription factor 1 | 6,669 | | 0,900 | 0,135 |
| SPIB | Spi-B transcription factor | 14,449 | | 1,799 | 0,125 |
| HDAC9 | histone deacetylase 9 | 332,320 | | 39,588 | 0,119 |
| TWIST2 | twist family bHLH transcription factor 2 | 17,783 | | 1,799 | 0,101 |
| TFAP2C | transcription factor AP-2 gamma | 25,563 | | 1,799 | 0,070 |
| GDAP1 | ganglioside induced differentiation associated protein 1 | 100,029 | | 5,398 | 0,054 |
| SAMSN1 | SAM domain, SH3 domain and nuclear localization signals 1 | 184,499 | | 5,398 | 0,029 |
| KDM5D | lysine demethylase 5D | 553,496 | | 0,900 | 0,002 |

| LPS100 |  | control | men19 | ratio |
| --- | --- | --- | --- | --- |
| MNDA | myeloid cell nuclear differentiation antigen | 245,177 | 1499,355 | 6,115 |
| MTURN | maturin, neural progenitor differentiation regulator homolog | 51,680 | 255,439 | 4,943 |
| RAVER2 | ribonucleoprotein, PTB binding 2 | 87,735 | 428,506 | 4,884 |
| RNASE2 | ribonuclease A family member 2 | 567,273 | 2410,450 | 4,249 |
| HDAC4 | histone deacetylase 4 | 676,642 | 2322,252 | 3,432 |
| GATA2 | GATA binding protein 2 | 33,652 | 114,823 | 3,412 |
| HDAC9 | histone deacetylase 9 | 403,822 | 86,533 | 0,214 |
| GATA3 | GATA binding protein 3 | 22,835 | 2,496 | 0,109 |
| NFATC2 | nuclear factor of activated T cells 2 | 1471,065 | 78,213 | 0,053 |
| GATA6 | GATA binding protein 6 | 16,826 | 0,832 | 0,049 |
| DNASE2 | deoxyribonuclease 2, lysosomal | 379,785 | 14,145 | 0,037 |
| SAMSN1 | SAM domain, SH3 domain and nuclear localization signals 1 | 627,366 | 17,473 | 0,028 |
| TWIST2 | twist family bHLH transcription factor 2 | 61,294 | 1,664 | 0,027 |
| KDM5D | lysine demethylase 5D | 656,210 | 14,977 | 0,023 |

S1C – Translation and ribosomal factors, nucleic acid modifiers

| BASELINE |  | control | men19 | ratio |
| --- | --- | --- | --- | --- |
| NSUN7 | NOP2/Sun RNA methyltransferase family member 7 | 0,000 | 22,493 |  |
| EEF1A2 | eukaryotic translation elongation factor 1 alpha 2 | 13,337 | 92,673 | 6,948 |
| CTIF | cap binding complex dependent translation initiation factor | 45,569 | 269,021 | 5,904 |
| PPARGC1A | PPARG coactivator 1 alpha | 11,114 | 55,784 | 5,019 |
| SARS | seryl-tRNA synthetase 1 - serine | 536,824 | 2288,927 | 4,264 |
| AARS | alanyl-tRNA synthetase 1 - alanine | 1134,778 | 3961,535 | 3,491 |
| RNASE2 | ribonuclease A family member 2 | 530,156 | 1765,281 | 3,330 |
| GARS | glycyl-tRNA synthetase 1 - glycine | 821,353 | 2439,183 | 2,970 |
| TRMT61A | tRNA methyltransferase 61A | 118,924 | 42,288 | 0,356 |
| TRMT2B | tRNA methyltransferase 2 homolog B | 261,188 | 82,776 | 0,317 |
| RIMKLA | ribosomal modification protein rimK like family member A | 27,786 | 4,499 | 0,162 |
| MT-TD | mitochondrially encoded tRNA Asp (GAU/C) - aspartic acid | 6,669 | 0,900 | 0,135 |
| DNASE2 | deoxyribonuclease 2 lysosomal | 76,689 | 9,897 | 0,129 |
| MT-TE | mitochondrially encoded tRNA Glu (GAA/G) - glutamic acid | 8,892 | 0,900 | 0,101 |
| DDX3Y | DEAD-box helicase 3 Y-linked | 986,957 | 2,699 | 0,003 |
| RPS4Y1 | ribosomal protein S4 Y-linked 1 | 1050,309 | 0,900 | 0,001 |
| EIF1AY | eukaryotic translation initiation factor 1A Y-linked | 152,267 | 0,000 |  |

| LPS100 |  |  |  |  |
| --- | --- | --- | --- | --- |
| NT5E | 5'-nucleotidase ecto | 9,615 | 54,083 | 5,625 |
| RAVER2 | ribonucleoprotein, PTB binding 2 | 87,735 | 428,506 | 4,884 |
| RNASE2 | ribonuclease A family member 2 | 567,273 | 2410,450 | 4,249 |
| MT-TV | mitochondrially encoded tRNA Val (GUN) - valine | 1,202 | 4,992 | 4,154 |
| MT-TY | mitochondrially encoded tRNA Tyr (UAU/C) - tyrosine | 1,202 | 4,992 | 4,154 |
| PPARGC1A | PPARG coactivator 1 alpha | 9,615 | 35,778 | 3,721 |
| MT-TM | mitochondrially encoded tRNA Met (AUA/G) - methionine | 14,422 | 4,160 | 0,288 |
| METTL7B | methyltransferase like 7B | 359,353 | 95,686 | 0,266 |
| TPMT | thiopurine S-methyltransferase | 322,096 | 75,717 | 0,235 |
| RNASE6 | ribonuclease A family member k6 | 27,643 | 3,328 | 0,120 |
| MT-TD | mitochondrially encoded tRNA Asp (GAU/C) - aspartic acid | 21,633 | 1,664 | 0,077 |
| DNASE2 | deoxyribonuclease 2 lysosomal | 379,785 | 14,145 | 0,037 |
| EIF1AY | eukaryotic translation initiation factor 1A Y-linked | 167,057 | 4,992 | 0,030 |
| DDX3Y | DEAD-box helicase 3 Y-linked | 1022,775 | 28,290 | 0,028 |
| RPS4Y1 | ribosomal protein S4 Y-linked 1 | 1044,408 | 23,297 | 0,022 |

S1D - Long noncoding RNAs, antisense transcripts, microRNAs

| BASELINE |  | control | men19 | ratio |
| --- | --- | --- | --- | --- |
| MIR146A | MIR3142 host gene | 0,000 | 51,285 |  |
| MIR616 | microRNA 616 | 0,000 | 26,992 |  |
| RP11-1L12.3 | BBOX1 antisense RNA 1 | 0,000 | 15,296 |  |
| VAC14-AS1 | VAC14 antisense RNA 1 | 0,000 | 14,396 |  |
| AC008174.3 | FSIP2 antisense RNA 1 | 0,000 | 11,697 |  |
| MIR181A1HG |  | 105,587 | 19,794 | 0,187 |
| RP1-249H1.4 | MARCKS cis regulating lncRNA promoter of cytokines and inflammation (ROCKI) | 102,252 | 15,296 | 0,150 |
| DGUOK-AS1 | DGUOK antisense RNA 1 | 12,226 | 1,799 | 0,147 |
| PCED1B-AS1 | PCED1B antisense RNA 1 | 524,599 | 58,483 | 0,111 |
| SENCR | smooth muscle and endothelial cell enriched migration/differentiation-associated lncRNA | 11,114 | 0,900 | 0,081 |
| IL10RB-AS1 |  | 14,449 | 0,900 | 0,062 |
| IL12A-AS1 | IL12A antisense RNA 1 | 47,792 | 1,799 | 0,038 |

| LPS100 |  | control | men19 | ratio |
| --- | --- | --- | --- | --- |
| PCED1B-AS1 | PCED1B antisense RNA 1 | 343,729 | 69,892 | 0,203 |
| RP1-249H1.4 | MARCKS cis regulating lncRNA promoter of cytokines and inflammation (ROCKI) | 82,928 | 15,809 | 0,191 |
| RP4-612B15.3 | CLCA4 antisense RNA 1 | 8,413 | 0,832 | 0,099 |
| KIF25-AS1 | KIF25 antisense RNA 1 | 12,019 | 0,832 | 0,069 |
| RP11-366L20.2 | HMGA2 antisense RNA 1 | 66,102 | 4,160 | 0,063 |
| RP11-82L2.1 | SMC2 antisense RNA 1 (head to head) | 16,826 | 0,832 | 0,049 |
| IL12A-AS1 | IL12A antisense RNA 1 | 63,698 | 0,832 | 0,013 |
| DPP10-AS1 | DPP10 antisense RNA 1 | 8,413 | 0,000 |  |
| ZNF582-AS1 | ZNF582 antisense RNA 1 (head to head) | 7,211 | 0,000 |  |

S1E – Interleukins and TNF systems, interferon-induced genes

| BASELINE |  | control | men19 | ratio |
| --- | --- | --- | --- | --- |
| ADAMTS20 | ADAM metallopeptidase with thrombospondin type 1 motif 20 | 0,000 | 19,794 |  |
| IL8 | C-X-C motif chemokine ligand 8 | 1,111 | 19,794 | 17,810 |
| SLFN12L | schlafen family member 12 like | 0,000 | 22,493 |  |
| C1QTNF3 | C1q and TNF related 3 | 16,672 | 82,776 | 4,965 |
| TNFAIP8 | TNF alpha induced protein 8 | 315,648 | 1485,463 | 4,706 |
| TNF | tumor necrosis factor | 216,730 | 510,150 | 2,354 |
| TNIK | TRAF2 and NCK interacting kinase | 154,490 | 55,784 | 0,361 |
| TNFSF13 | TNF superfamily member 13 | 17,783 | 3,599 | 0,202 |
| ADAMTS4 | ADAM metallopeptidase with thrombospondin type 1 motif 4 | 12,226 | 1,799 | 0,147 |
| IL4R | interleukin 4 receptor | 198,947 | 27,892 | 0,140 |
| TNFRSF10C | TNF receptor superfamily member 10c | 6,669 | 0,900 | 0,135 |
| IL16 | interleukin 16 | 54,460 | 7,198 | 0,132 |
| ADAM21 | ADAM metallopeptidase domain 21 | 8,892 | 0,900 | 0,101 |
| IL1RN | interleukin 1 receptor antagonist | 156,713 | 12,596 | 0,080 |
| IL18R1 | interleukin 18 receptor 1 | 48,903 | 3,599 | 0,074 |
| IL2RB | interleukin 2 receptor subunit beta | 20,006 | 0,900 | 0,045 |
| IL12A-AS1 | IL12A antisense RNA 1 | 47,792 | 1,799 | 0,038 |
| ADAM28 | ADAM metallopeptidase domain 28 | 28,897 | 0,900 | 0,031 |
| ADAMTS9 | ADAM metallopeptidase with thrombospondin type 1 motif 9 | 526,822 | 5,398 | 0,010 |

| LPS100 |  | control | men19 | ratio |
| --- | --- | --- | --- | --- |
| TNFRSF19 | TNF receptor superfamily member 19 | 0,000 | 5,824 |  |
| SLFN12L | schlafen family member 12 like | 1,202 | 30,786 | 25,615 |
| IL9R | interleukin 9 receptor | 1,202 | 8,321 | 6,923 |
| IL17D | interleukin 17D | 1,202 | 7,488 | 6,231 |
| IL20RA | interleukin 20 receptor subunit alpha | 1,202 | 4,992 | 4,154 |
| TNFAIP8 | TNF alpha induced protein 8 | 430,262 | 1611,681 | 3,746 |
| IL8 | C-X-C motif chemokine ligand 8 | 9,615 | 30,786 | 3,202 |
| ADAMTS5 | ADAM metallopeptidase with thrombospondin type 1 motif 5 | 14,422 | 4,160 | 0,288 |
| ADAMTS4 | ADAM metallopeptidase with thrombospondin type 1 motif 4 | 7,211 | 1,664 | 0,231 |
| IL4R | interleukin 4 receptor | 399,014 | 72,388 | 0,181 |
| ADAMTS10 | ADAM metallopeptidase with thrombospondin type 1 motif 10 | 90,139 | 13,313 | 0,148 |
| IL10RA | interleukin 10 receptor subunit alpha | 198,305 | 28,290 | 0,143 |
| IRAK2 | interleukin 1 receptor associated kinase 2 | 93,744 | 10,817 | 0,115 |
| SLFN5 | schlafen family member 5 | 292,050 | 29,122 | 0,100 |
| IL4I1 | interleukin 4 induced 1 | 486,749 | 43,267 | 0,089 |
| TNFRSF25 | TNF receptor superfamily member 25 | 82,928 | 6,656 | 0,080 |
| IL2RG | interleukin 2 receptor subunit gamma | 10,817 | 0,832 | 0,077 |
| IL21R | interleukin 21 receptor | 55,285 | 4,160 | 0,075 |
| ADAMTS9 | ADAM metallopeptidase with thrombospondin type 1 motif 9 | 462,712 | 29,954 | 0,065 |
| ADAM28 | ADAM metallopeptidase domain 28 | 222,342 | 11,649 | 0,052 |
| IL16 | interleukin 16 | 135,809 | 7,488 | 0,055 |
| TNFRSF9 | TNF receptor superfamily member 9 | 20,431 | 0,832 | 0,041 |
| IL2RB | interleukin 2 receptor subunit beta | 43,267 | 0,832 | 0,019 |
| TNIP3 | TNFAIP3 interacting protein 3 | 93,744 | 1,664 | 0,018 |
| IL18R1 | interleukin 18 receptor 1 | 58,891 | 0,832 | 0,014 |
| ADAMTS3 | ADAM metallopeptidase with thrombospondin type 1 motif 3 | 10,817 | 0,000 |  |
| IL18RAP | interleukin 18 receptor accessory protein | 7,211 | 0,000 |  |

S1F – Cluster of differentiation and other leukocyte markers

| BASELINE |  | control | men19 | ratio |
| --- | --- | --- | --- | --- |
| CD93 |  | 42,235 | 1454,872 | 34,483 |
| MARCO | macrophage receptor with collagenous structure = SR-A6 | 21,594 | 2,223 | 9,709 |
| FCGR2C | Fc fragment of IgG receptor IIc | 10,003 | 1,799 | 0.180 |
| C8G | complement C8 gamma chain | 5,557 | 0,900 | 0,162 |
| CD52 | CD52 molecule | 56,683 | 8,997 | 0,159 |
| LILRB1 | leukocyte immunoglobulin like receptor B1 | 34,455 | 5,398 | 0,157 |
| LILRA1 | leukocyte immunoglobulin like receptor A1 | 163,381 | 22,493 | 0,138 |
| KIAA1462 | junctional cadherin 5 associated | 202,282 | 26,092 | 0,129 |
| KIAA1462 | junctional cadherin 5 associated | 202,282 | 26,092 | 0,129 |
| CD40 | CD40 molecule | 71,132 | 8,098 | 0,114 |
| CD53 | CD53 molecule | 671,308 | 70,179 | 0,105 |
| CD248 | CD248 molecule | 8,892 | 0,900 | 0,101 |
| MPEG1 | macrophage expressed 1 | 14,449 | 0,900 | 0,062 |
| CD300A | CD300a molecule | 417,901 | 23,393 | 0,056 |
| CD300LB | CD300 molecule like family member b | 18,894 | 0,900 | 0,048 |
| CD180 | CD180 molecule | 296,754 | 8,098 | 0,027 |
| CD36 | scavenger receptor (SR-B2) | 300,088 | 6,298 | 0,021 |
| CFP | complement factor properdin | 104,475 | 1,799 | 0,017 |
| LILRB2 | leukocyte immunoglobulin like receptor B2 | 60,018 | 0,900 | 0,015 |
| PCDH10 | protocadherin 10 | 316,760 | 3,599 | 0,011 |
| FCGR2B | Fc fragment of IgG receptor IIb | 12,226 | 0,000 |  |

| LPS100 |  | control | men19 | ratio |
| --- | --- | --- | --- | --- |
| MARCO | macrophage receptor with collagenous structure = SR-A6 | 0,000 | 8,321 |  |
| C1R | complement C1r | 9,615 | 2,496 | 0,260 |
| C5AR1 | complement C5a receptor 1 | 57,689 | 14,145 | 0,245 |
| LILRB1 | leukocyte immunoglobulin like receptor B1 | 193,498 | 32,450 | 0,168 |
| LILRA1 | leukocyte immunoglobulin like receptor A1 | 426,657 | 67,396 | 0,158 |
| LILRA2 | leukocyte immunoglobulin like receptor A2 | 962,682 | 150,601 | 0,156 |
| LILRB2 | leukocyte immunoglobulin like receptor B2 | 300,463 | 17,473 | 0,058 |
| LILRA5 | leukocyte immunoglobulin like receptor A5 | 21,633 | 0,000 | 0,000 |
| CD300C | CD300c molecule | 97,350 | 19,969 | 0,205 |
| CD180 | CD180 molecule | 463,914 | 69,060 | 0,149 |
| CFP | complement factor properdin | 348,537 | 34,946 | 0,100 |
| CD248 | CD248 molecule | 16,826 | 1,664 | 0,099 |
| CD36 | scavenger receptor (SR-B2) | 525,209 | 45,763 | 0,087 |
| CD40 | CD40 molecule | 367,766 | 25,794 | 0,070 |
| CD52 | CD52 molecule | 56,487 | 2,496 | 0,044 |
| CD300A | CD300a molecule | 296,857 | 11,649 | 0,039 |
| FCGR2C | Fc fragment of IgG receptor IIc | 54,083 | 1,664 | 0,031 |
| CD48 | CD48 molecule | 33,652 | 0,832 | 0,025 |
| FCGR2B | Fc fragment of IgG receptor IIb | 43,267 | 0,832 | 0,019 |
| CD80 | CD80 molecule | 57,689 | 0,000 |  |
| CD86 | CD86 molecule | 27,643 | 0,000 |  |
| CD1C | CD1c molecule | 27,643 | 0,000 |  |
| CD1A | CD1a molecule | 8,413 | 0,000 |  |
| CD1B | CD1b molecule | 3,606 | 0,000 |  |
| CD1E | CD1e molecule | 3,606 | 0,000 |  |

S1G – Cell adhesion molecules

| BASELINE |  | control | men19 | ratio |
| --- | --- | --- | --- | --- |
| GPR126 | adhesion G protein-coupled receptor G6 | 2,223 | 28,792 | 12,952 |
| BAI3 | adhesion G protein-coupled receptor B3 | 5,557 | 59,383 | 10,686 |
| NCAM2 | neural cell adhesion molecule 2 | 5,557 | 59,383 | 10,686 |
| CEACAM19 | CEA cell adhesion molecule 19 | 1,111 | 10,797 | 9,714 |
| AMIGO1 | adhesion molecule with Ig like domain 1 | 6,669 | 61,182 | 9,175 |
| GPR97 | adhesion G protein-coupled receptor G3 | 3,334 | 22,493 | 6,746 |
| BAI2 | adhesion G protein-coupled receptor B2 | 2,223 | 9,897 | 4,452 |
| NCAM1 | neural cell adhesion molecule 1 | 36,677 | 13,496 | 0,368 |
| ICAM5 | intercellular adhesion molecule 5 | 7,780 | 2,699 | 0,347 |
| ICAM2 | intercellular adhesion molecule 2 | 58,906 | 17,095 | 0,290 |
| PVRL1 | nectin cell adhesion molecule 1 | 45,569 | 12,596 | 0,276 |
| GPR133 | adhesion G protein-coupled receptor D1 | 14,449 | 3,599 | 0,249 |
| ICAM3 | intercellular adhesion molecule 3 | 103,364 | 23,393 | 0,226 |
| KIRREL | kirre like nephrin family adhesion molecule 1 | 96,695 | 21,594 | 0,223 |
| CEACAM21 | CEA cell adhesion molecule 21 | 28,897 | 6,298 | 0,218 |
| MCAM | melanoma cell adhesion molecule (CD146) | 18,894 | 3,599 | 0,190 |
| ICAM1 | intercellular adhesion molecule 1 | 81,135 | 12,596 | 0,155 |
| GPR124 | adhesion G protein-coupled receptor A2 | 262,299 | 37,789 | 0,144 |
| ITGB7 | integrin subunit beta 7 | 58,906 | 8,098 | 0,137 |
| ESAM | endothelial cell adhesion molecule | 17,783 | 1,799 | 0,101 |
| ITGAM | integrin subunit alpha M (CD11b) | 294,531 | 11,697 | 0,040 |
| ICAM4 | intercellular adhesion molecule 4 | 13,337 | 0,000 | 0,000 |
| NEGR1 | neuronal growth regulator 1 | 74,466 | 2,699 | 0,036 |
| AMICA1 | junction adhesion molecule like | 7,780 | 0,000 | 0,000 |

| LPS100 |  | control | men19 | ratio |
| --- | --- | --- | --- | --- |
| CDH2 | cadherin 2 | 0,000 | 3,328 |  |
| NCAM2 | neural cell adhesion molecule 2 | 1,202 | 49,091 | 40,846 |
| CIB3 | calcium and integrin binding family member 3 | 1,202 | 20,801 | 17,308 |
| AMIGO1 | adhesion molecule with Ig like domain 1 | 4,807 | 74,885 | 15,577 |
| BAI3 | adhesion G protein-coupled receptor B3 | 6,009 | 33,282 | 5,538 |
| GPR126 | adhesion G protein-coupled receptor G6 | 8,413 | 30,786 | 3,659 |
| MCAM | melanoma cell adhesion molecule (CD146) | 27,643 | 7,488 | 0,271 |
| ITGAL | integrin subunit alpha L | 352,142 | 69,060 | 0,196 |
| ITGB7 | integrin subunit beta 7 | 74,515 | 14,145 | 0,190 |
| L1CAM | L1 cell adhesion molecule | 161,048 | 20,801 | 0,129 |
| GPR124 | adhesion G protein-coupled receptor A2 | 218,737 | 25,794 | 0,118 |
| NCAM1 | neural cell adhesion molecule 1 | 90,139 | 9,985 | 0,111 |
| VCAM1 | vascular cell adhesion molecule 1 | 42,065 | 4,160 | 0,099 |
| CADM1 | cell adhesion molecule 1 | 8,413 | 0,832 | 0,099 |
| ITGAX | integrin subunit alpha X (CD11c) | 1028,784 | 92,358 | 0,090 |
| ICAM1 | intercellular adhesion molecule 1 | 618,953 | 54,083 | 0,087 |
| ITGA6 | integrin subunit alpha 6 | 325,701 | 28,290 | 0,087 |
| EMR1 | adhesion G protein-coupled receptor E1 | 58,891 | 4,160 | 0,071 |
| ITGAM | integrin subunit alpha M (CD11b) | 835,286 | 33,282 | 0,040 |
| ITGA1 | integrin subunit alpha 1 | 58,891 | 1,664 | 0,028 |
| ICAM4 | intercellular adhesion molecule 4 | 7,211 | 0,000 |  |
| CEACAM1 | CEA cell adhesion molecule 1 | 6,009 | 0,000 |  |
| ESAM | endothelial cell adhesion molecule | 6,009 | 0,000 |  |
| EMR3 | adhesion G protein-coupled receptor E3 | 4,807 | 0,000 |  |
| CEACAM3 | CEA cell adhesion molecule 3 | 3,606 | 0,000 |  |

S1H – Growth and angiogenic factor systems

| BASELINE |  | control | men19 | ratio |
| --- | --- | --- | --- | --- |
| GREB1 | growth regulating estrogen receptor binding 1 | 0,000 | 26,092 |  |
| LTBP1 | latent transforming growth factor beta binding protein 1 | 0,000 | 9,897 |  |
| GADD45G | growth arrest and DNA damage inducible gamma | 0,000 | 5,398 |  |
| GDF9 | growth differentiation factor 9 | 1,111 | 13,496 |  |
| GDF6 | growth differentiation factor 6 | 2,223 | 23,393 |  |
| FGF9 | fibroblast growth factor 9 | 2,223 | 21,594 | 12,143 |
| IGFBPL1 | insulin like growth factor binding protein like 1 | 2,223 | 16,195 | 10,524 |
| GDF15 | growth differentiation factor 15 | 2,223 | 16,195 | 9,714 |
| LTBP2 | latent transforming growth factor beta binding protein 2 | 2,223 | 11,697 | 7,286 |
| TGFB2 | transforming growth factor beta 2 | 188,944 | 634,313 | 7,286 |
| CSF1 | colony stimulating factor 1 = macrophage colony stimulating factor (M-CSF) | 2.223 | 13.496 | 6.060 |
| TGFBR3L | transforming growth factor beta receptor 3 like | 16,672 | 47,686 | 5,262 |
| VEGFA | vascular endothelial growth factor A | 17,783 | 6,298 | 3,357 |
| LTBP3 | latent transforming growth factor beta binding protein 3 | 157,824 | 51,285 | 2,860 |
| FGFR3 | fibroblast growth factor receptor 3 | 40,012 | 11,697 | 0,354 |
| FGFR1 | fibroblast growth factor receptor 1 | 1571,573 | 364,393 | 0,325 |
| GAS2L1 | growth arrest specific 2 like 1 | 8,892 | 1,799 | 0,292 |
| IGF2BP1 | insulin like growth factor 2 mRNA binding protein 1 | 74,466 | 2,699 | 0,232 |
| GRTP1 | growth hormone regulated TBC protein 1 | 14,449 | 0,000 | 0,202 |
| CSF1R | CSF1 receptor | 704,652 | 98,071 | 0,139 |
| TGFA | transforming growth factor alpha | 6,669 | 0,000 | 0,067 |
| NEGR1 | neuronal growth regulator 1 | 74,466 | 2,699 | 0,036 |
| PDGFD | platelet derived growth factor D | 14,449 | 0,000 |  |
| PGF | placental growth factor | 6,669 | 0,000 |  |

| LPS100 |  | control | men19 |  |
| --- | --- | --- | --- | --- |
| TGFB2 | transforming growth factor beta 2 | 0,000 | 41,603 |  |
| LTBP1 | latent transforming growth factor beta binding protein 1 | 0,000 | 7,488 |  |
| IGFBP4 | insulin like growth factor binding protein 4 | 52,881 | 297,874 | 5,633 |
| TGFBR3L | transforming growth factor beta receptor 3 like | 3,606 | 19,137 | 5,308 |
| IGFBPL1 | insulin like growth factor binding protein like 1 | 7,211 | 34,114 | 4,731 |
| PDGFC | platelet derived growth factor C | 51,680 | 168,906 | 3,268 |
| GRB10 | growth factor receptor bound protein 10 | 255,994 | 814,577 | 3,182 |
| VEGFA | vascular endothelial growth factor A | 192,296 | 341,141 | 1,774 |
| GAS7 | growth arrest specific 7 | 4074,273 | 1399,509 | 0,343 |
| TGFB3 | transforming growth factor beta 3 | 30,046 | 9,985 | 0,332 |
| TGFBI | transforming growth factor beta induced | 694,670 | 219,661 | 0,316 |
| GDF9 | growth differentiation factor 9 | 6,009 | 1,664 | 0,277 |
| IGF2BP1 | insulin like growth factor 2 mRNA binding protein 1 | 2573,162 | 546,657 | 0,212 |
| CSF1R | CSF1 receptor | 1118,923 | 212,173 | 0,190 |
| GRTP1 | growth hormone regulated TBC protein 1 | 13,220 | 2,496 | 0,189 |
| GAS1 | growth arrest specific 1 | 4,807 | 0,832 | 0,173 |
| ANGPTL6 | angiopoietin like 6 | 16,826 | 2,496 | 0,148 |
| FGF17 | fibroblast growth factor 17 | 8,413 | 0,832 | 0,099 |
| IGF2 | insulin like growth factor 2 | 55,285 | 4,160 | 0,075 |
| PDGFRL | platelet derived growth factor receptor like | 15,624 | 0,832 | 0,053 |
| NEGR1 | neuronal growth regulator 1 | 222,342 | 9,153 | 0,041 |
| ANGPT1 | angiopoietin 1 | 8,413 | 0,000 | 0,000 |

S1I – Chemokines and chemokine receptors

| BASELINE |  | control | men19 | ratio |
| --- | --- | --- | --- | --- |
| CCL20 | C-C motif chemokine ligand 20 | 1,111 | 25,193 | 22,667 |
| CCR2 | C-C motif chemokine receptor 2 | 434,572 | 160,153 | 0,369 |
| CXCR3 | C-X-C motif chemokine receptor 3 | 13,337 | 0,900 | 0,067 |
| CX3CR1 | C-X3-C motif chemokine receptor 1 = fractalkine | 843,581 | 13,496 | 0,016 |
| CCR7 | C-C motif chemokine receptor 7 | 7,780 | 0,000 | 0,000 |
|  |  |  |  |  |

| LPS100 |  | control | men19 | ratio |
| --- | --- | --- | --- | --- |
| CXCR4 | C-X-C motif chemokine receptor 4 | 242,774 | 865,332 | 3,564 |
| CXCL14 | C-X-C motif chemokine ligand 14 | 1,202 | 4,160 | 3,462 |
| IL8 | C-X-C motif chemokine ligand 8 | 9,615 | 30,786 | 3,202 |
| CCL20 | C-C motif chemokine ligand 20 | 4,807 | 14,977 | 3,115 |
| CCR2 | C-C motif chemokine receptor 2 | 189,892 | 559,138 | 2,944 |
| CXCL10 | C-X-C motif chemokine ligand 10 | 75,717 | 14,977 | 0,198 |
| CXCL11 | C-X-C motif chemokine ligand 11 | 4,807 | 0,832 | 0,173 |
| CXCL13 | C-X-C motif chemokine ligand 13 | 44,468 | 4,992 | 0,112 |
| CX3CR1 | C-X3-C motif chemokine receptor 1= fractalkine | 735,532 | 81,541 | 0,111 |
| CCR7 | C-C motif chemokine receptor 7 | 73,313 | 1,664 | 0,023 |
| CXCR3 | C-X-C motif chemokine receptor 3 | 38,459 | 0,832 | 0,022 |
| CXCL16 | C-X-C motif chemokine ligand 16 | 13,220 | 0,000 |  |
| ACKR3 | atypical chemokine receptor 3 | 7,211 | 0,000 |  |
| CCR9 | C-C motif chemokine receptor 9 | 6,009 | 0,000 |  |
| CCR10 | C-C motif chemokine receptor 10 | 6,009 | 0,000 |  |

**Supplemental Table S2**

RNA-seq FPKM data for mascRNA monocytes

S2A - Innate immune sensors

| BASELINE |  | control | mascA4 | ratio |
| --- | --- | --- | --- | --- |
| IFITM10 | interferon induced transmembrane protein 10 | 2,121 | 18,385 | 8,667 |
| IFITM3 | interferon induced transmembrane protein 3 | 27,577 | 156,978 | 5,692 |
| IFITM1 | interferon induced transmembrane protein 1 | 9,899 | 45,255 | 4,571 |
| CIITA | class II major histocompatibility complex transactivator | 42,426 | 182,434 | 4,300 |
| NAIP | NLR family apoptosis inhibitory protein | 42,426 | 148,492 | 3,500 |
| KIAA1324 | endosome-lysosome associated apoptosis and autophagy regulator 1 | 1,414 | 4,243 | 3,000 |
| IFRD2 | interferon related developmental regulator 2 | 955,301 | 308,299 | 0,323 |
| AEN | apoptosis enhancing nuclease | 661,852 | 178,191 | 0,269 |
| PERP | p53 apoptosis effector related to PMP22 | 164,756 | 32,527 | 0,197 |

S2B – Transcription and nuclear factors, epigenetic modifiers

| BASELINE |  | control | mascA4 | ratio |
| --- | --- | --- | --- | --- |
| SP5 | Sp5 transcription factor | 1,414 | 28,284 | 20,000 |
| TP53INP1 | tumor protein p53 inducible nuclear protein 1 | 22,627 | 302,642 | 13,375 |
| SIM1 | SIM bHLH transcription factor 1 | 3,536 | 45,255 | 12,800 |
| NPIPB9 | nuclear pore complex interacting protein family member B9 | 0,707 | 8,485 | 12,000 |
| ETV1 | ETS variant transcription factor 1 | 21,920 | 165,463 | 7,548 |
| ELF3 | E74 like ETS transcription factor 3 | 0,707 | 4,243 | 6,000 |
| HDAC11 | histone deacetylase 11 | 1,414 | 8,485 | 6,000 |
| CHD5 | chromodomain helicase DNA binding protein 5 | 6,364 | 36,770 | 5,778 |
| METTL7A | methyltransferase like 7A | 53,033 | 206,475 | 3,893 |
| NFATC4 | nuclear factor of activated T cells 4 | 67,882 | 260,215 | 3,833 |
| DNASE1 | deoxyribonuclease 1 | 436,285 | 1159,655 | 2,658 |
| CCPG1 | cell cycle progression 1 | 86,974 | 181,019 | 2,081 |
| ETV4 | ETS variant transcription factor 4 | 77,075 | 9,899 | 0,128 |

S2C – Translation and ribosomal factors, nucleic acid modifiers

| BASELINE |  | control | mascA4 | ratio |
| --- | --- | --- | --- | --- |
| RNASE6 | ribonuclease A family member k6 | 18,385 | 57,983 | 3,154 |
| DNASE1 | deoxyribonuclease 1 | 436,285 | 1159,655 | 2,658 |
| MRPS26 | mitochondrial ribosomal protein S26 | 262,337 | 82,024 | 0,313 |
| MRPS12 | mitochondrial ribosomal protein S12 | 458,205 | 132,936 | 0,290 |
| RRP9 | ribosomal RNA processing 9, U3 small nucleolar RNA binding protein | 498,510 | 123,037 | 0,247 |
| NT5C1A | 5'-nucleotidase, cytosolic IA | 13,435 | 1,414 | 0,105 |

S2D - Long noncoding RNAs, antisense transcripts, microRNAs

| BASELINE |  | control | mascA4 | ratio |
| --- | --- | --- | --- | --- |
| RP11-443A13.5 | KCNMA1 antisense RNA 1 | 0,000 | 24,042 |  |
| AC078883.3 | ITGA6 antisense RNA 1 | 0,000 | 12,728 |  |
| RP11-496I9.1 | LMNTD2 antisense RNA 1 | 0,000 | 12,728 |  |
| RP1-249H1.4 | MARCKS cis regulating lncRNA promoter of cytokines and inflammation (ROCKI) | 294,156 | 934,795 | 3,178 |
| MIR3648 | microRNA 3648-2 | 3661,399 | 574,171 | 0,157 |
| MIRLET7D | microRNA let-7d | 12,728 | 1,414 | 0,111 |
| CELF2-AS1 | CELF2 antisense RNA 1 | 14,142 | 1,414 | 0,100 |

S2E – Interleukins and TNF systems, interferon-induced genes

| BASELINE |  | control | mascA4 | ratio |
| --- | --- | --- | --- | --- |
| ADAMTS4 | ADAM metallopeptidase with thrombospondin type 1 motif 4 | 4,243 | 26,870 | 6,333 |
| SLFN5 | schlafen family member 5 | 38,184 | 162,635 | 4,259 |
| IL17C | interleukin 17C | 0,707 | 2,828 | 4,000 |
| IL1B | interleukin 1 beta | 2,121 | 8,485 | 4,000 |
| IL10RA | interleukin 10 receptor subunit alpha | 32,527 | 100,409 | 3,087 |
| ADAMTS10 | ADAM metallopeptidase with thrombospondin type 1 motif 10 | 76,368 | 224,860 | 2,944 |
| ADAM33 | ADAM metallopeptidase domain 33 | 2,121 | 5,657 | 2,667 |
| ADAMTS6 | ADAM metallopeptidase with thrombospondin type 1 motif 6 | 17,678 | 46,669 | 2,640 |
| IL8 | C-X-C motif chemokine ligand 8 | 2,121 | 4,243 | 2,000 |
| TRAF5 | TNF receptor associated factor 5 | 33,234 | 5,657 | 0,170 |
| IL12A | interleukin 12A | 15,556 | 1,414 | 0,091 |

S2F – Cluster of differentiation and other leukocyte markers

| BASELINE |  | control | mascA4 | ratio |
| --- | --- | --- | --- | --- |
| FCGR2C | Fc fragment of IgG receptor IIc | 7,778 | 288,500 | 37,091 |
| FCGR2B | Fc fragment of IgG receptor IIb | 7,071 | 207,889 | 29,400 |
| LSP1 | lymphocyte specific protein 1 | 12,728 | 309,713 | 24,333 |
| C1R | complement C1r | 0,707 | 12,728 | 18,000 |
| C5AR2 | complement component 5a receptor 2 | 1,414 | 18,385 | 13,000 |
| LAX1 | lymphocyte transmembrane adaptor 1 | 1,414 | 9,899 | 7,000 |
| CFP | complement factor properdin | 71,418 | 434,164 | 6,079 |
| LILRA5 | leukocyte immunoglobulin like receptor A5 | 1,414 | 5,657 | 4,000 |
| LILRA4 | leukocyte immunoglobulin like receptor A4 | 0,707 | 2,828 | 4,000 |
| MST1 | macrophage stimulating 1 | 34,648 | 138,593 | 4,000 |
| C5AR1 | complement C5a receptor 1 | 14,142 | 55,154 | 3,900 |
| LILRB3 | leukocyte immunoglobulin like receptor B3 | 2,121 | 7,071 | 3,333 |
| LILRA6 | leukocyte immunoglobulin like receptor A6 | 1,414 | 4,243 | 3,000 |
| MPEG1 | macrophage expressed 1 | 14,849 | 43,841 | 2,952 |
| CD93 | CD93 molecule | 824,487 | 2,828 | 0,003 |

S2G – Cell adhesion molecules

| BASELINE |  | control | mascA4 | ratio |
| --- | --- | --- | --- | --- |
| JAM2 | junctional adhesion molecule 2 | 0,000 | 15,556 |  |
| NCKAP1 | NCK associated protein 1 | 0,707 | 9,899 | 14,000 |
| CEACAM1 | CEA cell adhesion molecule 1 | 0,707 | 8,485 | 12,000 |
| KIRREL3 | kirre like nephrin family adhesion molecule 3 | 0,707 | 7,071 | 10,000 |
| CEACAM6 | CEA cell adhesion molecule 6 | 103,945 | 840,043 | 8,082 |
| AMICA1 | junction adhesion molecule like | 3,536 | 21,213 | 6,000 |
| CEACAM4 | CEA cell adhesion molecule 4 | 12,021 | 59,397 | 4,941 |
| ITGAM | integrin subunit alpha M | 298,399 | 1364,716 | 4,573 |
| CEACAM19 | CEA cell adhesion molecule 19 | 4,243 | 18,385 | 4,333 |
| PCDH11X | protocadherin 11 X-linked | 4,950 | 19,799 | 4,000 |
| CDHR4 | cadherin related family member 4 | 0,707 | 2,828 | 4,000 |
| SMAGP | small cell adhesion glycoprotein | 41,719 | 161,220 | 3,864 |
| ITGA9 | integrin subunit alpha 9 | 25,456 | 89,095 | 3,500 |
| ITGAX | integrin subunit alpha X | 328,805 | 1093,187 | 3,325 |
| ICAM1 | intercellular adhesion molecule 1 | 57,983 | 190,919 | 3,293 |
| ICAM4 | intercellular adhesion molecule 4 | 16,263 | 49,497 | 3,043 |
| PCDHB9 | protocadherin beta 9 | 4,950 | 14,142 | 2,857 |
| CDH23 | cadherin related 23 | 45,962 | 130,108 | 2,831 |
| KIAA1462 | junctional cadherin 5 associated | 502,046 | 155,563 | 0,310 |
| PCDH17 | protocadherin 17 | 118,794 | 5,657 | 0,048 |

S2H – Growth and angiogenic factor systems

| BASELINE |  | control | mascA4 | ratio |
| --- | --- | --- | --- | --- |
| ANGPT4 | angiopoietin 4 | 0,000 | 5,657 |  |
| ANGPT1 | angiopoietin 1 | 0,000 | 5,657 |  |
| IGFALS | insulin like growth factor binding protein acid labile subunit | 0,000 | 5,657 |  |
| ANG | angiogenin | 0,707 | 8,485 | 12,000 |
| LTBP2 | latent transforming growth factor beta binding protein 2 | 2,121 | 18,385 | 8,667 |
| GDF7 | growth differentiation factor 7 | 1,414 | 11,314 | 8,000 |
| TGFA | transforming growth factor alpha | 3,536 | 28,284 | 8,000 |
| FGF11 | fibroblast growth factor 11 | 4,243 | 32,527 | 7,667 |
| ANGPTL4 | angiopoietin like 4 | 1,414 | 8,485 | 6,000 |
| FGF17 | fibroblast growth factor 17 | 2,828 | 15,556 | 5,500 |
| GDF5 | growth differentiation factor 5 | 0,707 | 2,828 | 4,000 |
| NGFR | nerve growth factor receptor | 2,828 | 8,485 | 3,000 |
| GADD45G | growth arrest and DNA damage inducible gamma | 1,414 | 4,243 | 3,000 |
| VEGFA | vascular endothelial growth factor A | 456,084 | 1294,005 | 2,837 |
| TGFBI | transforming growth factor beta induced | 717,006 | 2022,325 | 2,821 |
| CSF1 | colony stimulating factor 1 = macrophage colony-stimulating factor (M-CSF) | 4,950 | 1,414 | 0,286 |

S2I – Chemokines and chemokine receptors

| BASELINE |  | control | mascA4 | ratio |
| --- | --- | --- | --- | --- |
| CXCL16 | C-X-C motif chemokine ligand 16 | 1,414 | 11,314 | 8,000 |
| CCL22 | C-C motif chemokine ligand 22 | 4,950 | 22,627 | 4,571 |
| ACKR2 | atypical chemokine receptor 2 | 6,364 | 28,284 | 4,444 |
| CCL24 | C-C motif chemokine ligand 24 | 4,243 | 18,385 | 4,333 |
| CCR10 | C-C motif chemokine receptor 10 | 0,707 | 2,828 | 4,000 |
| CRLF1 | cytokine receptor like factor 1 | 2,828 | 11,314 | 4,000 |
| CRLF2 | cytokine receptor like factor 2 | 1,414 | 5,657 | 4,000 |

**Manuscript with complete references**

The evolutionary conserved *NEAT1-MALAT1* cluster encounters high interest in both cardiovascular medicine and oncology. In the cardiovascular field, we observed suppression of lncRNA *NEAT1* in circulating immune cells of post-myocardial infarction (MI) patients 1. Mice lacking lncRNAs *NEAT1* 1 or *MALAT1* 2-4 displayed immune disturbances affecting monocyte-macrophage and T cell differentiation and rendering the immune system highly vulnerable to stress stimuli, thereby promoting the development of atherosclerosis 1,2,4-8. Uncontrolled inflammation is also a key driver of multiple other diseases 1,2,9-19.

Here, we report the first biological functions of two novel tRNA-type transcripts from the *NEAT1-MALAT1* cluster (Fig. 1) and describe deep impact upon innate immunity and macrophage functions. While we previously investigated mice deficient in the entire *NEAT1* or *MALAT1* locus, we now aimed to selectively disrupt only tRNA-like transcripts ‘menRNA’ arising from *NEAT1* 17,20,21, or ‘mascRNA’ arising from *MALAT1.*  To date, no biological function of neither one of the tRNA-like transcripts has been reported. Both lncRNAs give rise to transcripts of vastly different size (*NEAT1*: 23kb MENb, 3.7kb MENe, 59nt ‘menRNA’; *MALAT1*: 8.3 kb primary, 58nt ‘mascRNA’), and traditional knockout methods are unable to selectively inactivate one of the small transcripts only. Through CRISPR-Cas9 editing 22-25, we therefore developed human monocyte-macrophage cell lines with short deletions in the respective tRNA-encoding sequences to disrupt normal menRNA or mascRNA formation, respectively. These editing proceduresoccur outside of the primary transcript sequences required for regular formation of the triple-helix structures at their 3’-ends which support stabilization of the respective lncRNAs (Fig. 1AB). The CRISPR-Cas9-based editing of menRNA or mascRNA selectively prevented only the normal transcript folding and formation of mature menRNA or mascRNA, respectively. Unlike monocytes and macrophages in *NEAT1-/-* mice 1, CRISPR-Cas9-generated DmenRNA cells retained MEN-b and MEN-e expression. Similarly, DmascRNA monocytes preserved expression of the long *MALAT1* precursor while mascRNA, normally highly enriched in this cell type, became ablated.

Beyond prior work documenting immune function of the *NEAT1-MALAT1* cluster, the current study identifies menRNA and mascRNA as novel elements of innate immunity impacting upon cytokine regulation, immune cell-endothelium interactions, angiogenesis, and monocyte-macrophage differentiation and functions. These molecules are prototypes of a new class of RNAs distinct from other small transcripts (miRNAs, siRNAs) by biosynthetic pathway and intracellular kinetics. From an evolutionary perspective, the *NEAT1-MALAT1* genomic region appears as archetype of a functionally highly integrated RNA processing system.

**Results**

***Targeted deletion of tRNA-like transcripts from the NEAT1-MALAT1 cluster***

While previously investigated mice were deficient in the entire *NEAT1* or *MALAT1* locus 1,2,4, we here aimed to selectively disrupt only the novel 59-nt tRNA-like transcript ‘menRNA’ with so far unknown biological functions (Fig. 1A). Through CRISPR-Cas9 editing, we developed human THP-1 monocyte-macrophage cell lines with deletions of different extent all of which prevent, however, normal transcript folding and formation of menRNA or mascRNA, respectively. Unlike monocytes/macrophages in *NEAT1-/-* mice 1, the CRISPR/Cas9-generated DmenRNA cells retained apparently normal MEN-b and MEN-e expression. Similarly, DmascRNA monocytes/macrophages preserved expression of the *MALAT1* precursor (Fig. 1B) whereas mascRNA, normally highly enriched in this cell type, became ablated (Suppl. Fig. S1-S3). As a consequence of its rapid turnover, the cellular steady-state level of menRNA is very low. For this reason, the silencing efficacy of ASOs or siRNAs with regard to menRNA abundance in the cells could not be ascertained neither by RT-PCR nor Northern blot analyses (Suppl. Fig. S1C and D). Very low menRNA abundance in immune cells is in sharp contrast to the enrichment of mascRNA in monocytes first described by our group 3. We found high efficacy of antisense oligonucleotides (ASOs) targeting the mascRNA sequence, regarding reduction of the mascRNA level in monocytes. Importantly, however, neither ASOs nor siRNAs are capable to selectively react with and thereby ablate only the ’mature’ menRNA or mascRNA, respectively. Instead, they will also react with the 23kb *NEAT1* and 8.3kb *MALAT1* long precursor transcripts and mediate their premature decay, making unequivocal distinction between biological effects of menRNA/mascRNA ablation from those of *NEAT1*/*MALAT1* reduction 1,2,4 impossible. In the peculiar case of the high-turnover menRNA, the CRISPR-Cas9 deletion clone as employed here is obviously a highly specific system for selective menRNA ablation and subsequent functional assignment of cellular/biological functions to menRNA. Finally, any attempt to generate germ-line menRNA or mascRNA deficient animal models would be technically demanding and likely also display developmental/ embryonic anomalies of disturbances in somatic cells other than immune cells/monocytes. One would instead need mice with a monocyte-specific, adult-age inducible, selective knockout of the menRNA or mascRNA sequence only to resolve these issues. Beyond these technical challenges, there exists no murine homologue to human IL-8 which was, however, the most strongly deregulated cytokine in circulating immune cells of post-MI patients 1. These ambiguities are avoided by CRISPR-mediated deletion in one specific cell type/line of human origin. We examined whether absence of menRNA in DmenRNA monocytes affects, by some cytosolic-nuclear feedback mechanism, the cellular expression level of *NEAT1*. Under the experimental conditions employed here, however, there was no change as detectable by RNA-sequencing (RNA-seq) and qRT-PCR.

***Defective innate immune sensing by DmenRNA and DmascRNA cells***

RNA-seq identified profound alterations in the baseline transcriptomes of DmenRNA and DmascRNA monocytes (Fig. 2AB, Suppl. Tables S1/S2). A prominent finding was gross dysbalance between multiple innate immune sensors in DmenRNA monocytes (Fig. 3AB, Table S1A), including cytosolic NOD-like receptors NOD2 26-33 and CIITA 34-36, NLR-class receptors NLRC3 37-39, NLRC4 39,40 and MEFV 39,41,42, and membrane-bound Toll-like receptors (TLR 2, TLR1, TLR10, TLR7). In the context of baseline induction of NOD2 and TLR2, it is notable that twist family bHLH transcription factor 2 (TWIST2) 43 was ~10-fold down in DmenRNA cells (Fig. 3DE), and loss of NLRC3 and TWIST2 expression in DmenRNA monocytes could not be rescued by LPS (Fig. 3H)(compare Fig. 5AD). DmascRNA monocytes displayed induction of interferon (IFN)-induced transmembrane (IFITM) proteins 44(Fig. 3C, Table S2A).

***Transcription, translation, and epigenome level anomalies in defective monocytes***

Transcription and nuclear factors and epigenome modifiers (Fig. 3D-F, Tables S1B/S2B), as well as translation factors, ribosomal proteins and nucleic acid modifiers (Fig. 3I-L, Tables S1C/S2C) were deregulated in defective cells. At the transcriptional level, in addition to TWIST2, transcription factor (TF) GATA2 was ~4-fold induced and GATA6 ~20-fold suppressed (Fig. 3DE) 45, and NFATC2 46 switched off in DmenRNA cells (Fig. 5AD). Further TFs and epigenome modifiers turned into disequilibrium upon LPS challenge (Fig. 3E), among them histone deacetylases, lysine demethylases, and METTL methyltransferases 47. At the level of translation, three initiation and elongation-related factors (EIF3CL, EEF1A2, CTIF) were induced while initiation factor EIF1AY 48,49 and ribosomal protein RPS4Y1 were switched off in DmenRNA cells (Fig. 3IK). Nucleic acid-modifying enzymes deregulated include DEAD-box helicase DDX3Y (shut off), and NOP2/Sun methyltransferase NSUN7 50-56 which is switched on in DmenRNA cells (Fig. 3I, Table S1C). At the level of tRNAs, genomically or mitochondrially encoded tRNAs 51-55 and tRNA methyltransferases turned into imbalance. In DmascRNA cells (Fig. 3L), cytosolic nucleotidase NT5C1A 57 dephosphorylating 5' and 2'(3')-phosphates of deoxyribonucleotides with broad substrate specificity, is suppressed. Furthermore, RNA-seq identified deregulation of long noncoding RNAs (lncRNAs) and antisense (AS) RNAs in DmenRNA and DmascRNA monocytes (Tables S1D/2D). Thus, DmenRNA cells showed ~7-fold downregulation of a recently discovered novel transcript designated ’MARCKS cis-regulating lncRNA promoter of cytokines and inflammation’ or ‘regulator of cytokines and inflammation’ (ROCKI) (Fig. 4DE, Table S1D/S2D). This transcript of particular interest was identified by Zhang *et al.* 58-61 by genome-wide scan of macrophages for pairs of cis-acting lncRNAs and protein-coding genes involved in innate immunity.

***Excessive inflammatory cytokine production by*** ***DmenRNA and DmascRNA cells***

We found massively elevated basal expression and secretion of IL-8, TNF, and IL1B in DmenRNA monocytes (Fig. 4AB). DmascRNA monocytes displayed exaggerated LPS induction of IL1A, IL1B, IL10, and ISG15 (Fig. 4C). Conversely, DmenRNA but not DmascRNA macrophages displayed blunted NOS2 expression and impaired ROS production upon LPS or H2O2 challenge (Fig. 5B). There were anomalies of further interleukin (IL)/receptor and TNF cytokine/receptor systems (Fig. 4D-F, Tables S1E/S2E). Receptor IL4R was ~7-fold and M2 macrophage polarization regulator IL4I1 62-67 ~11-fold down in DmenRNA monocytes (Fig. 4DE). Even more pronounced was disequilibrium within the IL18 system 68,69. Receptor IL18R1 and IL18 receptor accessory protein (IL18RAP) were switched off. IL2 receptor IL2R-b (IL2RB) was ~52-fold and IL2R-g (IL2Rc) ~13-fold suppressed 70-76. IL1 receptor antagonist (IL1RN) was ~12-fold and IL1 receptor associated kinase 2 (IRAK2) ~8-fold down in DmenRNA cells. Among ligands, IL16 remained ~18-fold suppressed even after LPS stimulation.

‘Regulator of cytokines and inflammation’ (ROCKI) was ~7-fold and SLFN5, a transcriptional co-repressor of interferon (IFN) responses and antiviral restriction factor 77-80, ~10-fold suppressed in DmenRNA monocytes (Fig. 4DE) while another member (SLFN12L) of the SLFN family of IFN-induced genes was ~26-fold up. Several ADAM metallopeptidases (Tables S1E/S2E) as well as cluster of differentiation (CD) and other leukocyte marker proteins 81-83 (Tables S1F/S2F) were likewise deregulated and some of them switched off in DmenRNA (Fig. 4DE) or DmascRNA cells (Fig. 4F).

***Disturbed growth pattern and endothelium interactions of DmenRNA monocytes***

At the cellular level, DmenRNA monocytes displayed an anomalous growth pattern with spontaneous cell cluster formation in liquid culture (Fig. 5A), and defective endothelial adhesion under multiple flow conditions (Fig. 5B). The LPS-dependent induction of cell adhesion molecules (ICAM1, VCAM1) was defective in DmenRNA monocytes (Fig. 5C), contrasting with exacerbated induction in DmascRNA monocytes. DmenRNA monocyte-conditioned medium altered expression of multiple gene in HAEC monolayers (Fig. 5D), whereas DmascRNA monocyte medium had no such effect. This observation of transcriptome changes in endothelial cells under influence of the DmenRNA monocyte secretome prompted further studies regarding indirect influence of the anomalous monocyte clones upon endothelial cell behaviour, mediated *via* their secretomes, or *via* interaction between the monocytes and endothelial cells in co-cultures of both cell types in matrigel (Fig. 5H-M). RNA-seq identified profound deregulation of further cell adhesion molecules in DmenRNA monocytes (Fig. 5EF, Table S1G), including adhesion G protein-coupled receptors 84, intercellular and neural cell adhesion molecules, integrins, vascular cell adhesion molecule, melanoma cell adhesion molecule MCAM (CD146), and endothelial cell-specific adhesion molecule (ESAM). DmascRNA cells also displayed anomalous cell adhesion molecule expression (Fig. 5G, Table S2G), however distinct from DmenRNA monocytes. Neuronal growth regulator NEGR1 85,86 is ~28-fold suppressed in DmenRNA but unaltered in DmascRNA monocytes, whereas cytoskeleton regulating NCKAP1 87-91 was ~14-fold increased in DmascRNA while unaltered in DmenRNA cells. lncRNA SENCR, involved in maintenance of endothelial cell homeostasis 92-94, is ~12-fold down in DmenRNA monocytes (Table S2D), suggesting menRNA loss may lead to SENCR downregulation and cellular dysfunction in endothelial cells, too.

***Impact of DmenRNA and DmascRNA monocytes upon angiogenesis***

A quantitative effect of DmenRNA and DmascRNA monocyte-conditioned media upon HAEC-based tube formation was observed in matrigel assays. Supernatant from each of the defective cell clones significantly reduced the tube number (Fig. 5H). Beyond this quantitative effect of secreted factors from the cells, direct co-culture of DmenRNA as well as of DmascRNA monocytes with the HAECs in the matrigel assay lead to profound alterations of HAEC cell morphology (Fig. 5I). In co-cultures with either of the defective monocyte clones, there was a massive increase in the size of HAECs at branch side nodes where ≥3 endothelial cells came into contact. When the defective monocytes clones were stained red before addition to the HAEC-matrigel mixture, there was significant accumulation of red cells at branch side nodes where HAEC hypertrophy occurred (Fig. 5I). Consistent with these observations, multiple growth and angiogenesis-associated factors and chemokines 95-106 were in disequilibrium in DmenRNA (Fig. 5KL, Table S1H) and DmascRNA monocytes (Fig. 5M, Table S12H).

***Response of DmenRNA and DmascRNA macrophages to human-pathogenic viruses***

PMA-based *in vitro* differentiation of DmenRNA and DmascRNAmonocytes into adherent macrophages rendered the cells susceptible to transduction by recombinant adenovirus expressing GFP (Suppl. Fig. S8A). Similarly, DmenRNA and DmascRNA macrophages became transducible with human coxsackievirus B3 (CVB3) and displayed an immune response to the internalized CVB3 ssRNA genome, in the absence of active CVB3 virus replication (Suppl. Fig. S8B). In DmenRNA macrophages, without LPS stimulation or adenovirus transduction, IL8 expression was >100-fold induced compared to controls (Fig. 6A). Adenovirus resulted in moderate IL8 decrease, while control cells retained extremely low IL8 expression upon transduction. Several other genes had significantly higher baseline expression in DmenRNA macrophages, either *without* response to virus (TNF, SLFN12L, NOD2, TLR2, Il1B), or with significant *further* induction upon exposure (RIG-like receptors RLR1 and RLR2, ISG 15, TGFB2). Most conspicuous was a complete shutdown of genes suppressed in DmenRNA monocytes (Fig. 3A-E, Fig. 4EF) already before their transformation into macrophages: NOD-like innate immune genes NLRC3 and MEFV, IL2 receptor subunits b and g 70-76, transcription factor TWIST2, and NFATC2 46. None of these genes fully silenced in macrophages could be ’rescued’ by adenovirus exposure (Fig. 6A), similar to findings in LPS-stimulated monocytes (Fig. 3A-E, Fig. 4EF). Fig. 6B shows the response of DmenRNA macrophages to CVB3. Regarding IL8, their response to CVB3 with further IL8 induction beyond their already very high baseline level, was opposite to their anti-adenovirus reaction. ISG15 and Il1B responded similarly to CVB3 and RR5, while IRF7 and IRF9 expression were downregulated by CVB3 only. Inducible NO synthase (NOS2) expression as well as ROS production upon LPS or H2O2 challenge was significantly reduced in DmenRNA macrophages (Fig. 6C). Fig. 6D summarizes key defects of the antiviral response.

***menRNA deletion critically disturbs scavenger receptor expression and oxLDL uptake***

DmenRNA macrophages display loss of oxLDL uptake (Fig. 6E), consistent with their loss of scavenger receptors (Fig. 6F) 107-113. DmenRNA cells showed further anomalies regarding receptors involved in phagocytosis: Fcγ receptors (FcγRs) 114-117 and complement receptors (CRs) 118 (Fig. 6HI).

***Defective monocyte-macrophage transition and polarization of DmenRNA and DmascRNA cells***

DmenRNA monocytes are unable to normally differentiate into M0 macrophages upon PMA exposure (Fig. 7A). This is consistent with disturbances of CD molecule expression in these cells, including CD11b (ITGAM), CD11c (ITGAX) 119,120, and CD93 82,121-132. Beyond monocyte-macrophage transition, there was defective M1/M2 polarization 133,134 of DmenRNA and DmascRNA cells. Rather simple expression profiles allowed distinction between DmascRNA and DmenRNA macrophages and controls (Fig. 7B-D). A “M2-like” pattern CD163hi CD200Rhi CD206hi TGFB3hi TLR10hi was observed in DmascRNA cells 135,136. A profile involving IL1B, CD93, TGFB2, TLR7, CSF1 and its receptor CSF1R 137-149 unequivocally characterizes DmenRNA monocytes-macrophages and is preserved through polarization. Upon prolonged culture, the morphological aspect of M2-polarized DmenRNA cell cultures was clearly distinct from control and DmascRNA cells (Fig. 7E).

***Genetic heterogeneity of the NEAT1-MALAT1 region in humans***

Since multiple data suggests inflammation control functions of the *NEAT1-MALAT1* cluster, we investigated the extent of variability of this region in humans by screening for sequence variants in cohorts from the population-wide SHIP study. The SHIP database encompasses clinical, biochemical, and molecular genetic data from 7.500 individuals from Central Europe (Suppl. Fig. S5 and S6AB). Full sequence data for the specific target regions of the current study, *i.e.* mascRNA and menRNA, are currently unavailable for any patient cohorts, although several SNP are known to occur mascRNA and menRNA (Suppl. Fig. S4). One *MALAT1* SNP with low minor allele frequency (MAF=0.01) located in the *MALAT1* promotor was associated (p=0.0062) with systemic low level inflammation (CRP>3.0 mg/L) (Suppl. Fig. S7A).

**Discussion**

*NEAT1* and *MALAT1* are involved in two fields of medicine (cardiovascular and malignant diseases) linked to some degree by common immune-related mechanisms 5,6,8,9,11. A unified concept to explain the connections of this genomic region to apparently diverse diseases may be derived from recent observations regarding immunoregulatory functions of transcripts from this cluster, encompassing the current study assigning novel immune functions to both tRNA-like transcripts. Despite differences in their specific regulatory properties, it appears that the fundamental principle of ’employing’ this peculiar type of small ncRNAs was evolutionarily advantageous.

***Prior studies of the NEAT1-MALAT1 cluster***: We reported suppression of lncRNA *NEAT1* in circulating immune cells of post-MI patients. In mice lacking lncRNAs *NEAT1* 1 or *MALAT1* 2-4 we observed immune disturbances rendering the immune system unstable and highly vulnerable to immune stress. *MALAT1*-/+ ApoE-/- mice suffered accelerated atherosclerosis despite normal diet compared to ApoE-/- mice. *NEAT1*-/- mice showed anomalous T cell and monocyte-macrophage differentiation, and systemic inflammation. *NEAT1* promotes inflammasome activation in macrophages, regulates M2 polarization 150, and influences Th17/CD4+ T cell differentiation. *NEAT1* knockdown induces a tolerogenic phenotype in dendritic cells by inhibiting NLRP3 inflammasome activation 151. Further *NEAT1* or *MALAT1* related anomalies were reported in non-immune cell types: cardiomyocytes 152-155 156, endothelial cells, and smooth muscle cells where an HDAC9-*MALAT1*-BRG1 complex mediates dysfunction 157,158. Clinically, *NEAT1* correlated with increased exacerbation risk, severity, and inflammation in asthma 159, and with worse disease condition and poor recurrence-free survival in acute ischemic stroke. *NEAT1* is elevated in peripheral blood cells of Parkinson disease patients 160 and abnormally expressed in a wide variety of human cancers 161.

***Functional dissection of the NEAT1-menRNA system***: A subset of lncRNAs, termed architectural RNAs (arcRNAs), function in formation and maintenance of phase-separated membraneless organelles. In the crowded intracellular environment these are important forms of compartmentalization. Thus, *NEAT1* is a well-characterized arcRNA acting as an essential scaffold of paraspeckle nuclear bodies 162-169. In contrast, no cellular or biological functions of the cytosolic menRNA or mascRNA were known so far. Synopsis of prior genetic studies of *MALAT1* and *NEAT1* 17,170-176 with the present one delineate the *NEAT1-MALAT1* region as a highly integrated RNA processing circuitry critically contributing to immune homeostasis. Its components MEN-b, MEN-e, menRNA, *MALAT1*, *TALAM1* 176 and mascRNA are obviously set for balanced interaction with each other, and genetic ablation of any element leads to major dysfunction.

***Critical defects of innate immune sensing****:* One key finding in DmenRNA cells was deregulation of membrane-bound (TLR2) and cytosolic immune sensors (Fig. 3). NOD2 26,27,30,31 and CIITA 34-36 were massively induced while NLR-class receptors NLRC3 37-39, NLRC4 39,40 and MEFV 39,41,42 were shut off in DmenRNA cells and could be rescued neither by LPS nor virus exposure. TWIST2, a critical regulator of cytokines in human monocyte-derived macrophages 43, NFATC2 which translocates to the nucleus upon T cell receptor stimulation 46, and IL2 receptor subunits b and g 70-73}74-76, were likewise shut down and not rescuable. Further, there was massive downregulation of lncRNA ROCKI, apparently resulting from mere deletion of the small ‘menRNA’ sequence from an otherwise intact ~23 kb *NEAT1*. An important recent study 58 discovered that ROCKI is a master regulator of inflammatory responses. Beyond the transcription level, DmenRNA and DmascRNA cells displayed major changes of their epigenomes (Fig. 3).

***Loss of inflammatory cytokine control****:* DmenRNA and DmascRNA cells display anomalous antiviral responses (Fig. 5). Even in absence of infectious agents or other immune challenges, however, DmenRNA cells display massive inductions of IL8 and TNF (Fig. 4). Regarding IL8, clinical observational studies suggest a critical role of IL8 in cardiovascular diseases 177-185 and stroke 186-188. IL8 is mechanistically involved in the innate immune response by TLR4 signaling, induces neutrophil extracellular traps (NETs) *via* activation NFkB signaling 189, mediates hyper-signaling in aortic aneurysms, and is involved in endothelial adhesion 190. With regard to IL8, our prior transcriptome analysis of circulating immune cells from post-MI patients 1 is of interest. IL8 was the most decisively upregulated gene post-MI, contrary to an extremely low level in healthy subjects, although all patients were receiving state-of-the-art post-MI pharmacological treatment. In that study, the long primary lncRNA transcript *NEAT1* was significantly suppressed in post-MI PBMCs. The new data from DmenRNA cells are consistent with the assumption that reduction of the menRNA level in PBMCs (consecutive to or independent of the observed *NEAT1* reduction) directly contributes to IL8 induction. Further, the marked IL1B induction in post-MI PBMCs would parallel the high baseline IL1B expression in DmenRNA cells. It would have been most interesting to directly measure menRNA levels in the post-MI PBMCs. Due to the complex secondary and tertiary structure of mature menRNA this would have required, however, Northern blot analyses for which there was insufficient RNA available in that former post-MI study. For future translational studies, our approach to study menRNA and mascRNA directly suggests new avenue since their highly dynamic levels may be more closely related to clinical parameters and clinical course than those of their nuclear precursors.

***Imbalance of angiogenic factors and chemokine systems***: Excessive inflammatory cytokine production appears as one downstream consequence of defective immune sensing. Imbalance of angiogenic factors, chemokines, and cell-cell adhesion molecules may be considered as further sequelae of dysfunction at the sensor level. It is not unexpected that the anomalies at this level should have far-reaching impact upon the cells’ biological behavior. Thus, irrespective of differences between DmenRNA and DmascRNA cells, both significantly decreased tube formation in matrigel assay and displayed profound deregulation of cell-cell adhesion molecules (Fig. 5). In the case of DmenRNA cells, the latter was immediately apparent by their anomalous growth in clusters, and their defective endothelial flow adhesion to HAECs. While de-repression of multiple growth/angiogenetic factors appears directly linked to anomalous endothelial cell growth and morphology in the monocyte-endothelial cell co-cultures, this imbalance of growth/angiogenetic factors apparently does not support effective tube formation, but instead hinders it.

***Defective foam cell formation and macrophage polarization****:* This occurs in the context of large-scale disturbance of the cells’ immune sensors from NOD-like and Toll-like (Fig. 3) to phagocytosis-related receptors (Fig. 6). Overall, the cells are unable to adequately respond to immune challenges including LPS, viruses, oxLDL, and polarization cytokines (Fig. 7). Defective interaction with endothelium and angiogenesis-promoting matrix may be added to their anomalous relationship with the environment (Fig. 5).

***Loss of nucleus-to-cytosol supply of menRNA or mascRNA***: As both menRNA and mascRNA are continuously exported from nucleus to cytosol under normal conditions (Fig. 8), changes of the translational/ribosomal apparatus are likely to be linked to the complete loss of nucleus-to-cytosol supply of these tRNA-like molecules in the defective cells. Importantly, mascRNA displays very high steady-state levels within immune cells, while other cell types are essentially devoid of it, although they do express precursor *MALAT1* at normal levels 2,3. While the exact molecular function of the high mascRNA levels in immune cells (Suppl. Fig. S1E) remains undefined in humans and other species carrying *MALAT1*-like genomic loci 191-195, key importance for immune homeostasis was highly likely by inference and is definitely confirmed by the present data. In this context, a recent study by Lu *et al.* 193 is of interest showing that mascRNA binds directly to multi-tRNA synthetase complex component glutaminyl-tRNA synthetase, and promotes global protein translation and cell proliferation by positively regulating QARS protein levels.

In the case of menRNA, on the other hand, steady-state levels in immune cells are very low. This may be entirely due, however, to the known CCACCA-tagging of menRNA for rapid degradation 21,196-199. menRNA’s primary nucleus-to-cytosol supply rate may be similar to that of mascRNA, which just remains stable as it is not CCACCA-tagged. DmenRNA cells display major disequilibrium at the tRNA/translational level with induction of initiation and elongation factors EIF3CL, EEF1A2 and CTIF, whereas translation initiation factor EIF1AY 49 was switched off. Further, there was deregulation of tRNAs, tRNA methyltransferases (TRMT61, TRMT2B), and RNA methyltransferase NSUN7.

Pioneering recent studies discovered hitherto unknown immune functions of tRNAs and their enzymatic processing products and may contribute to explain our current findings regarding the impact of menRNA and mascRNA ablation. tRNA products encompass tRNA-derived small RNAs (tsRNAs), tRNA-derived stress-induced RNAs (tiRNAs), and tRNA-derived fragments (tRFs). Pereira *et al.* 104 found that m(5)U54 tRNA hypomodification, from lack of methyltransferase TRMT2A, drives tsRNAs generation. As similar tRNA methyltransferases are deregulated in DmenRNA and DmascRNA cells, this may change tsRNA generation therein.

Yue *et al.* 105 found SLFN2 protection of tRNAs from stress-induced cleavage to be essential for T cell-mediated immunity. SLFN2 binds tRNAs and protects them from cleavage by the ribonuclease angiogenin (~12-fold induced in DmascRNA cells) 100,104. SLFN2 deficient T cells display accumulation of stress-induced tiRNAs which inhibit translation and promote stress-granule formation. They found IL2R-b and IL2R-g fail to be translationally up-regulated after T cell receptor stimulation, while we observed ~52-fold IL2R-b and ~13-fold IL2R-g suppression in DmenRNA monocytes upon LPS stimulation. In these cells, SLFN family member SLFN12L was ~31-fold induced whereas SLNF5 was ~10-fold suppressed compared to controls. Yue *et al.* showed ROS trigger an oxidative stress response leading to translation repression which is countered by SLFN2. In DmenRNA monocytes we found LPS-stimulated ROS production as well as NOS2 expression are blunted, suggesting disturbance of a regulatory circuit encompassing menRNA, SLFN family members 77,200-206, and NO and ROS biosynthetic enzymes in these defective cells.

***Genetic variability of the NEAT1-MALAT1 genomic region in humans****:*Within a cohort of 7.492 individuals we found one rare (MAF 0.0113) *MALAT1* promotor SNP associated with low-level chronic inflammation. The current pilot study in a population wide-cohort was not designed to identify clinical phenotype associations with mascRNA or menRNA sequence variants which are known to occur, however, in humans. For five of the known menRNA SNPs MAFs are very low ranging from 0.0044 to 0.0002. Given the distinct functional sensitivity of the tRNA-like sequences to point mutations, it seems worthwhile to obtain full sequences in patient cohorts suffering from atherosclerosis and other disorders associated with chronic low-level inflammation.

***Conclusions and outlook****:* Beyond prior work in mice documenting immune function of the *NEAT1-MALAT1* region, the current study identifies menRNA and mascRNA as novel components of innate immunity with deep impact upon cytokine regulation, immune cell - endothelium interactions, angiogenesis, and macrophage formation and functions. These tRNA-like transcripts are prototypes of a new class of ncRNAs distinct from other small transcripts (miRNAs, siRNAs) by biosynthetic pathway and intracellular kinetics, suggesting a novel link for the apparent relevance of the *NEAT1-MALAT1* cluster in cardiovascular and neoplastic diseases. The *NEAT1-MALAT1* region has emerged as a highly integrated RNA processing circuitry. Its components MEN-b, MEN-e, menRNA, *MALAT1*, *TALAM1*, and mascRNA are set for well-balanced interactions with each other, and ablation of any element leads to major cellular and systemic dysfunction. For future translational studies, our approach to study menRNA and mascRNA directly suggests new avenue since their highly dynamic levels may be more closely related to clinical parameters and clinical course than those of their nuclear precursors. They may also have value as therapeutic targets for pharmacological intervention since they are more easily accessible than their extremely complex nuclear-located precursor molecules.

**Figure Legends**

**Figure 1**

***Targeted deletion of tRNA-like transcripts from the NEAT1-MALAT1 cluster***

*Panel A*: The *NEAT1-MALAT1* gene cluster encodes two primary transcripts which are subsequently processed to transcripts of vastly different size. The *NEAT1* locus yields the 23kb MENb (NEAT1_1) and 3.7kb MENe (NEAT1_2). Of note, the long MENb transcript forms an unusual triple helix structure at its 3’-end which has been shown to stabilize this long transcript. From the primary transcript, an additional short tRNA-like 59nt ‘menRNA’ is generated through RNAse P and Z enzymatic cleavage.

*Panel B*: The *MALAT1* locus yields a 8.3 kb primary transcript also forms a stabilizing triple helix at the 3’-end, and through enzymatic cleavage another small tRNA-like 59nt ‘mascRNA’. Using CRISPR-Cas9, we developed human monocyte-macrophage cell lines with menRNA or mascRNA sequence deletions as indicated. The editing proceduresoccur outside of the primary transcript sequences required for regular formation of the triple-helix structures at their 3’-ends which support stabilization of the respective lncRNAs. Under the experimental conditions employed there was no change in *NEAT1* expression as detectable by RNA-sequencing (RNA-seq) and qRT-PCR.

Further details on targeted genomic regions (Suppl. Fig. S1AB), recombinant expression and Northern blot analysis of menRNA (Suppl. Fig. S1CD), structure prediction for residual transcripts (Suppl. Fig. S2), *in vitro* transcription of single-guide RNAs for CRISPR-Cas9 experiments (Suppl. Fig. S3A), and PCR analysis and sequencing of the deletion clones (Suppl. Fig. S3BC) are provided in the Supplement.

**Figure 2**

***Gene set enrichment analysis of DmenRNA and DmascRNA monocytes***

RNA-seq identified profound alterations in the baseline transcriptomes of DmenRNA *(panel A)* and DmascRNA *(panel B)* monocytes. Gene set enrichment analysis (GSEA) of RNA‐seq datasets mapped against gene sets from Molecular Signature Database’s (MSigDB) collection derived from Kyoto Encyclopedia of Genes and Genomes (KEGG) pathway database. For further details on RNA-seq analyses please refer to Suppl. Tables S1/S2.

**Figure 3**

***Disturbances of innate immune sensing, transcription and translation in defective monocytes***

*Panels A-C (Innate immune sensing)*

A key finding of the RNA-seq was imbalance between multiple innate immune sensors in DmenRNA cells under baseline *(panel A)* and LPS-stimulated *(panel B)* conditions (Table S1A). Amongst cytosolic receptors, NOD2 30,31 was ~8-fold and CIITA 36 ~17-fold induced, whereas NLR-class receptors NLRC3, NLRC4, NAIP and MEFV 40 were suppressed in DmenRNA monocytes. Amongst membrane-bound Toll-like receptors, TLR 2 showed ~10-fold elevated baseline expression in DmenRNA cells (compare Fig. 5A). In contrast, defective induction was seen for TLR6, TLR1, TLR8, TLR10, and TLR7 in DmenRNA upon LPS challenge *(panel B)*. In the context of the observed massive baseline induction of NOD2 and TLR2 it is notable that twist family bHLH transcription factor 2 (TWIST2) 43 was ~10-fold down in these DmenRNA cells *(panels AB)*, and that loss of NLRC3 and TWIST2 expression in DmenRNA monocytes could not be rescued by LPS *(panel H,* compare Fig. 5AD for related findings in macrophages). mascRNA cells likewise displayed anomalies in immune sensor expression *(panel C)*(Table S2A), however different from those observed in DmenRNA cells. Prominent in DmascRNA monocytes was the induction of interferon (IFN)-induced transmembrane (IFITM) proteins which represent primary cellular defenses against multiple viruses 44. Upon PMA-induced differentiation of DmenRNA and DmascRNA monocytes into macrophages multiple further baseline anomalies of antiviral defense genes became apparent (Suppl. Fig. S9).

In both defective clones there was imbalance of apoptosis-related genes. In LPS-stimulated DmenRNA cells *(panel B)* apoptosis regulator BOK and Niban apoptosis regulator FAM129C 207-210 were upregulated, whereas serine/threonine kinase RIPK3 and apoptosis inhibitor NAIP 211-213 and CARD14 214 were suppressed here. In DmascRNA cells *(panel C)*, NAIP was induced while apoptosis enhancing nuclease AEN 215 was ~ 3.-fold and p53 apoptosis effector PERP 216 ~ 5.1-fold suppressed (Table S2A).

In addition to alterations of protein-coding genes, RNA-seq identified deregulation of long noncoding RNAs (lncRNAs) and antisense (AS) RNAs in DmenRNA and DmascRNA monocytes (Tables S1D/2D). Thus, DmenRNA cells showed ~7-fold downregulation of a recently discovered novel transcript designated ’MARCKS cis-regulating lncRNA promoter of cytokines and inflammation’ or ‘regulator of cytokines and inflammation’ (ROCKI) (*panels AB*)(Tables S1D/S2D). This transcript of particular interest was identified by Zhang *et al.* 58-61 conducting a genome-wide scan of TLR-stimulated macrophages for pairs of cis-acting lncRNAs and protein-coding genes involved in innate immunity.

*Panels D-F (Transcriptional level)*

Several transcription factors (TF), nuclear factors and epigenome modifiers were deregulated in defective cells. At the transcriptional level, in addition to TWIST2, TF GATA2 was ~4-fold induced and GATA6 ~20-fold suppressed, and NFATC2 46 switched off in DmenRNA cells *(panels DE)* at baseline already (compare Fig. 5AD for related findings in macrophages). Further TFs (SOX4, ETS1, STAST4) and epigenome modifiers turned into disequilibrium upon LPS challenge, among them histone deacetylases (HDAC4, HDAC9, HDAC11), lysine demethylases (KDM1B, KDM7A), and METTL methyltransferase family members 47 known or predicted to methylate DNA, RNA or proteins (METTL7A, METTL7B). *Panel G* summarizes the most prominent changes of cytosolic and membrane-bound innate immune sensors, and of transcription factors and epigenome modifiers, in DmenRNA and DmascRNA monocytes. *Panel H* exemplifies how LPS-stimulation exacerbates several of these deregulations (e.g. CIITA and NOD2) while this stimulation it is uncapable to overcome certain blocks (e.g. of NLRC3 or TWIST2)(see Fig. 5AD for related findings in macrophages). Bar graphs show means ± SE from three biological replicates.

*Panels I-L (Translational level)*

Particular anomalies were identified regarding translation factors, ribosomal proteins and nucleic acid modifiers in DmenRNA *(panels IK)* as well as DmascRNA monocytes *(panel L)*. In DmenRNA cells thetranslation initiation and elongation factors EIF3CL, EEF1A2, and CTIF were induced, whereas the initiation factor EIF1AY was completely silenced 48,49. DEAD-box helicase DDX3Y and ribosomal protein RPS4Y1 were switched off, too, in menRNA-deficient cells under baseline conditions *(panel I)* and these shutdowns persisted upon LPS stimulation of the cells *(panels K)*. By contrast, RNA methyltransferase NSUN7 which is able to reinforce transcription concomitant with m(5)C marks on enhancer RNAs 50,54, was switched on in DmenRNA monocytes *(panel I)* while undetectable in control cells. At the level of tRNAs, genomically or mitochondrially encoded tRNAs 52,54 and tRNA methyltransferases (TRMT61A, TRMT2B) displayed major deregulation in DmenRNA cells *(panel IK)*. DmascRNA cells *(panel L)*, on the other hand, showed none of these alterations, whereas cytosolic nucleotidase NT5C1A 57 which dephosphorylates the 5' and 2'(3')-phosphates of deoxyribonucleotides and has broad substrate specificity, is ~10-fold suppressed here.

*Panel M* summarizes major changes regarding the translational machinery in menRNA-deficient monocytes, including translation factors and a poly(A) binding protein, tRNA methylases, two SLFN family members, angiogenin (ANG), and IL2 receptor subunits b and g 70-76. These alterations within the translation system of DmenRNA monocytes may lead to accumulation of anomalous tRNAs and tRNA fragments (tiRNAs, tsRNAs), in particular under conditions of cellular or immune stress (for details see the discussion section *Loss of nucleus-to-cytosol supply of menRNA or mascRNA*).

**Figure 4**

***menRNA and mascRNA deletion results in loss of cytokine control and imbalance of interleukin systems***

*Panel A*: Prominent was massively elevated expression and secretion of the IL-8, TNF, and IL1B in unstimulated DmenRNA cells. Cytometric bead assay protein data on media conditioned by control monocytes (green), DmenRNA (orange), and DmascRNA cells (red). *Panel B*: qRT-PCR quantification of gene expression levels. For all three proinflammatory cytokines, DmenRNA displayed far more pronounced induction than DmascRNA cells. *Panel C*: DmascRNA monocytes displayed exaggerated induction of IL1A, IL1B, IL10, and ISG15 expression upon LPS-stimulation as compared to controls. Only stimulated DmenRNA cells showed a further increase of IL8 expression, whereas IL16 217-221 was suppressed in this clone at baseline, and failed to become induced upon LPS challenge.

*Panels D-F:* RNA-seq identified further anomalies of IL and TNF systems. Among receptors, IL4R was ~7-fold and IL4-induced gene (IL4I1) ~11-fold suppressed in stimulated DmenRNA cells *(panels DE)*. Even more pronounced was disequilibrium in the IL18 system (IL18R1 >70-fold inhibited, IL18 receptor accessory protein IL18RAP switched off). In the IL2 system, receptor subunit IL2R-b was ~52-fold and IL2R-g ~13-fold suppressed in LPS-stimulated DmenRNA monocytes (*panel E*). Regarding the IL1 system, IL1 receptor antagonist IL1RN was ~12-fold and IL1 receptor associated kinase IRAK2 ~8-fold down in DmenRNA cells. Among the ligands, IL16 expression remained ~18-fold blunted even upon LPS-challenge (compare *panel C*).

**Figure 5**

***Impact of menRNA and mascRNA deletions upon monocyte-endothelium interactions and angiogenesis***

*Panels A-D (Endothelial cell interactions)*

At the cellular level, DmenRNA monocytes displayed an anomalous growth pattern with spontaneous cell cluster formation in liquid culture *(panel A)*. Despite this morphological anomaly, there was no significant difference in their cell proliferation kinetics compared to DmascRNA and control monocytes (data not shown). DmenRNA cell showed defective endothelial adhesion under multiple flow conditions *(panel B)*. While expression of vascular cell adhesion molecule 1 (VCAM-1) was ~200-fold induced by LPS, starting from a very low baseline level in control cells, this induction was almost entirely blunted in DmenRNA cells. Similarly, the LPS-dependent induction of ICAM1 was strongly reduced in these defective cells *(panel C)*. Transfer of DmenRNA monocyte-conditioned medium to HAEC endothelial monolayers triggered changes in the expression of multiple genes including ~10-fold increased ISG15, ~8-fold increased IL8, ~7-fold increased IRAK1, ~7-fold increased ICAM1, whereas DmascRNA-conditioned medium exerted no such influence. Bars graphs show means ± SE from two biological replicates *(panel D)*.

*Panels E-G (Cell adhesion molecule profiles)*

RNA-seq identified profound deregulation of multiple cell adhesion molecules in DmenRNA cells *(panels EF)* including adhesion G protein-coupled receptors (GPRs, BAIs) 84,222, intercellular adhesion molecules (ICAMs), neural cell adhesion molecules (NCAMs), integrins (aM, aL, aX, a1, a4, a6, b7) 119,120, vascular cell adhesion molecule (VCAM1), and ESAM (endothelial cell-specific adhesion molecule) 223-226.

DmascRNA cells *(panel G)* displayed deregulation of several cell adhesion molecules, too, however distinct from those observed in DmenRNA cells. Thus, neuronal growth regulator NEGR1, involved in neuronal growth and connectivity and cell-cell interactions in general 85,86, is ~28-fold down in Dmen19 while unaltered in Dmasc19 cells. Cytoskeleton regulating NCKAP1 87-91 was ~14-fold increased in DmascRNA while unaltered in DmenRNA cells.

*Panels H-M (Angiogenesis, growth factors and chemokine systems)*

Quantitative effects of both ΔmenRNA (orange) and ΔmascRNA (red) monocyte-conditioned media upon HAEC-based tube formation in an angiogenesis assay, as compared to Cas9 controls (green). Supernatant from each of the defective cell clones highly significantly reduced the number of tubes formed. Bars graphs show means ± SE from three biological replicates *(panel H).* Beyond a quantitative effect of secreted factors from the cells, direct co-culture of ΔmenRNA as well as of ΔmascRNA monocytes with the HAECs lead to profound alterations of HAEC cell morphology. In co-cultures with any of the defective monocytic clones, there was a massive increase in the size of HAECs at many branch side nodes where ≥3 endothelial cells came into contact (white arrows in the upper and middle rows). When the defective monocytes clones were red-stained (with DiI) before addition to the HAEC-matrigel mixture, there was significant accumulation of red cells (black arrows in the lower row) at branch side nodes where HAEC hypertrophy occurred *(panel I).*

Multiple growth and angiogenesis-associated factors as well as chemokines were in disequilibrium in both DmenRNA *(panels KL, table S1G)* and DmascRNA monocytes *(panel M, table S2G)*. Compared to controls, DmascRNA monocytes showed ~12-fold increased baseline expression of angiogenin (ANG), a key protein of angiogenesis interacting with [endothelial](https://en.wikipedia.org/wiki/Endothelial) and [smooth muscle](https://en.wikipedia.org/wiki/Smooth_muscle) cells resulting in cell migration, invasion, proliferation and formation of tubular structures. Beyond these properties, ANG exhibits ribonucleolytic activity critical for its biological functions and is also involved in nucleic acid metabolism 96,98-106. DmascRNA cells *(panel M)* displayed induction of angiopoietins ANGPT1 and ANGPT4, angiopoietin-like 4 (ANGPTL4), and vascular endothelial growth factor (VEGFA). While DmenRNA monocytes likewise showed induction of VEGFA, angiopoietin like 6 (ANGPTL6) was ~7-fold down and ANGPT1 shut off here.

Within the transforming growth factor system, TGF b2 (TGFB2) expression was undetectable in controls but strongly induced in DmenRNA cells *(panels KL)*. Similarly, one latent TGF b-binding protein (LTBP1) and TGFBR3L were induced from low baseline levels. Conversely, TGF b3 (TGFB3) was downregulated as well as the TGF b-induced gene TGFBI. GREB1, a suppressor of TGF-b signaling 227,228, was undetectable in controls, but high in DmenRNA cells. DmascRNA monocytes *(panel M)* also displayed significant TGF system deregulation, but distinct from DmenRNA cells. Thus, TGF a (TGFA) was ~8-fold induced in DmascRNA cells while TGF b2 expression was unchanged. Another latent TGF b-binding protein (LTBP2) and TGF b induced (TGFBI) gene were upregulated here. Insulin like growth factor (IGF) system is likewise disturbed, and growth differentiation factors including GDF5, a bone morphogenetic protein (BMP) ligand from the TGF-β superfamily 229.

While two chemokine receptors (CXCR4 and CCR2) were ~3-fold induced in stimulated DmenRNA cells *(panels KL)*, C-X3-C chemokine receptor 1 (CX3CR1) (fractalkine receptor) 230-235 displays ~9-fold reduced expression. Receptors CCR7 and CXCR3 were massively ~44-fold suppressed in DmenRNA cells. Among ligands, CXC-type CXCL10, CXCL11, CXCL13, and CXCl16 displayed up to ~10-fold suppressed expression in this clone 236-239.

**Figure 6**

***Antiviral response, foam cell formation and oxLDL uptake of DmenRNA and DmascRNA macrophages***

*Panels A-D (Response to human-pathogenic viruses)*

PMA-induced differentiation of DmenRNA cells to adherent macrophages rendered the cells susceptible to efficient transduction by recombinant viruses derived from the human-pathogenic double-stranded DNA (dsDNA) adenovirus type 5. At a multiplicity of infection (MOI) 25, the GFP-expressing virus AdV-CMV-GFP efficiently transduced these macrophages, resulting in strong GFP expression in >50 % of cells (Suppl. Fig. S8A). In thus generated macrophages, without LPS stimulation or virus exposure, the IL8 expression level was massively ~130-fold compared to controls (*panel A*). Transduction with a recombinant adenovirus without the GFP expression cassette (AdV-RR5) resulted in a significant decrease of IL8 expression level in these DmenRNA cells, to ~40-fold of the level in control macrophages. In contrast, control cells displayed no change of their very low baseline IL8 expression, in response to AdV-RR5. DmenRNA macrophages showed ~17-fold higher baseline TNF expression compared to controls. Transduction with AdV-RR5 resulted in no significant change of TNF transcription, neither in DmenRNA nor control cells. Similarly, TLR2 expression was ~5-fold higher in DmenRNA macrophages vs. controls, without changes in response to AdV-RR5. Several other genes were induced in response to transduction (RIG-like receptors RLR1 and RLR2, ISG 15), but without significant differences between defective and control cells. Striking was a complete shutdown of several genes already suppressed in DmenRNA monocytes (Fig. 3A-E, Fig. 4EF) before their transformation into macrophages: NOD-like innate immune genes NLRC3 and MEFV, IL2 receptor subunits b and g 70-76, transcription factor TWIST2, and NFATC2 46. None of these genes fully silenced in macrophages could be ’rescued’ by adenovirus exposure, similar to findings in LPS-stimulated monocytes (Fig. 3A-E, Fig. 4EF). Bar graphs show means ± SE from three biological replicates.

*Panel B* shows the response of DmenRNA macrophages to Coxsackievirus B3, an important human-pathogenic single-stranded RNA (ssRNA) virus. Their IL8 response to CVB3 (~5-fold induction upon virus exposure) was opposite to that to AdV-RR5 (reduction of IL8 to ~2/3 of the high baseline level). Efficient transduction by CVB3 was detected by qRT-PCR, while CVB3 (-) minus strand-specific RT-PCR indicative of active replication was negative for all clones (Suppl. Fig. S8B). Bar graphs show means ± SE from two biological replicates. *Panel C* displays blunted NOS2 expression (qRT-PCR) by DmenRNA but not DmascRNA macrophages at baseline and upon adenovirus exposure, as well as impaired ROS production after LPS or H2O2 challenge. Bars graphs show means ± SE from three biological replicates. *Panel D* summarizes the leading anomalies in CRISPR-Cas9 modified human DmenRNA macrophages.

*Panels E-K (Foam cell formation and oxLDL uptake)*

*Panels E-G*: Whereas DmascRNA macrophages displayed an oxLDL uptake pattern undistinguishable from that of control cells (intracellular Oil Red-positive OR+ vesicles as indicated by red arrows). In contrast, essentially no normal-sized intracellular OR+ vesicles were observed in DmenRNA macrophages (p< 0.0001) 24 hrs after oxLDL exposure. A minor number of very small OR+ particles is visible in DmenRNA cells. It appears these minute particles are not artifacts, and do not represent spontaneous intracellular accumulation of any OR+ material in the DmenRNA cells, but residues of defective oxLDL endocytosis since they do not show up without prior oxLDL challenge (*panel G*).The striking defect of oxLDL uptake by DmenRNA macrophages is paralleled by loss of scavenger receptors CD36 240-245, MCAM (CD146)246,247, MSR1, and OLR1 (LOX1) 248,249 (*panel F*). Bars graphs show means ± SE from four biological replicates.

*Panels H-K*: These changes occur in the context of further anomalies, identified by RNA-seq of monocytes, affecting phagocytosis as an evolutionarily conserved general defense mechanism involving, beyond scavenger receptors, Fcγ receptors (FcγRs) 114-117 and complement receptors (CRs) 118. FCGR2 genes encoding Fc fragments of inhibitory FcγRIIB are suppressed in DmenRNA cells and not rescuable by LPS (*panel HI*). Complement component properdin (CFP) is likewise down. Of note, DmascRNA cells (*panel K*) display opposed deregulation of the same FCGR2 genes, and induction of properdin and other complement components. Remarkable is also strong opposed deregulation of CD93 127-129,250 in DmenRNA compared to DmenRNA monocytes. While massively induced in DmenRNA cells, CD93 was shut down in DmascRNA monocytes, contrasting with robust expression in controls. CD93 is a lectin receptor involved in control of the immune response 82,130. Another distinction between the defective clones regards MPEG-1 (perforin-2), an evolutionary ancient protein involved in the unspecific immune defense 83, which was ~16-fold down in DmenRNA while upregulated in DmascRNA cells.

Scavenger receptor CD36 81,240,251 was ~48-fold down in DmenRNA monocytes. They also show suppression of Cluster of Differentiation (CD) marker CD40, a member of the TNF receptor family, and of CD52, a glycoprotein modulating T-cell activation 252-254. CD300A and CD300C, involved in viral immune evasion 255,256, were ~26-fold and ~5-fold suppressed, respectively. None of the group 1 CD1 molecules, normally expressed on cells specialized in antigen presentation, could be induced by LPS-treatment of DmenRNA cells. Finally, leukocyte immunoglobulin like receptors (LILRs) 257 were broadly deregulated. DmascRNA cells *(panel K)* displayed none of these DmenRNA-associated CD molecule or LILR deregulations.

**Figure 7**

***Anomalous monocyte-macrophage differentiation and polarization***

Whereas the monocyte clones had similar proliferation kinetics in liquid culture (Fig. 5A), they differed with respect to their macrophage differentiation and response to polarization agents. Monocyte-M0 macrophage differentiation and subsequent M1/M2 macrophage polarization were conducted as follows: First, M0 macrophages were generated by incubation of THP-1 monocyte clones for seven days, with PMA at a concentration of 100 ng/ml. Thereafter, the cells were further incubated for another seven days, either with IFN-g at 20 ng/ml plus LPS at 100 ng/ml to induce M1 polarization, or with IL-4 at 20 ng/ml plus IL-13 at 20 ng/ml to induce M2 polarization. ’M0’ expression profiles and FACS data in panels A-C were obtained on day 7 of culture. The ’M1’ and ’M2’ expression profiles in panels BC were obtained on day 14 of culture. Expression profiling allowed unequivocal distinction between each of the three clones (DmenRNA, DmenRNA, controls).

*Panel A*: DmenRNA monocytes were uncapable of normal differentiation into M0 macrophages upon PMA exposure, consistent with the grave disturbance of CD molecule expression in these monocytes (including CD11b, CD11c). In accordance with these transcription level alterations, FACS analysis identified defective transition from monocytes (both DmenRNA and DmascRNA) to M0 macrophages as assessed by CD11b and CD14 expression. The graphs display the statistics of 5-6 independent biological samples (one-way ANOVA multiple comparisons, FACS gatings in Suppl. Fig. S9B).

*Panel B*: A distinctive expression profile was characteristic of DmenRNA cells. It was observed in DmenRNA monocytes (Fig. 4A-C), DmenRNA M0 macrophages, and preserved upon their treatment with M1 or M2 polarization protocol. This conserved pattern encompasses IL1B, CD93, TGFB2, CSF1 and its receptor CSF1R. While high pro-inflammatory IL1B expression is common to M1-polarized cells, the massive induction of CD93 or the CSF1 - CSF1 receptor system 138-149 observed here is not commonly associated with either M1 or M2 polarized cells. Bars graphs in panels B and C show means ± SE from four biological replicates. The expression levels of each gene are normalized to the control clone level at the respective time, i.e. day 7 for M0 macrophages, and day 14 for M1 and M2 polarized cells.

*Panel C*: Beyond M0 differentiation, another characteristic expression profile developed for DmascRNA cells. A “M2-prone” pattern comprising CD163hi CD200R1hi CD206hi CX3CR1hi TLR10hi was observed in DmascRNA macrophages upon the M2 polarization protocol 230,248,258-275. This is easily distinguished from the profile of control and DmenRNA cells after this treatment. TLR10 was recently identified as anti-inflammatory pattern-recognition receptor 135,136 and added to this “M2-prone” pattern.

*Panel D*: At the end of the 14 days M2 polarization protocol, the morphological aspect of M2-polarized DmenRNA macrophages was grossly different from that of control cells and DmascRNA cells. At that time, ”colony-like” cell clusters became visible in both control and DmascRNA cultures, whereas the distribution of the M2-polarized DmenRNA macrophage remained essentially homogeneous.

**Figure 8**

***Summary figure and working model***

Analysis of monocytes-macrophages carrying narrowly targeted deletions of the novel tRNA-like molecules indicates they are critical building blocks required for balanced function of innate immunity. The grave disturbance of multiple immune sensor systems - with complex downstream sequelae – might be addressed by a working hypothesis invoking a primordial defect linked to the peculiar structure of menRNA and mascRNA. They closely resemble common tRNAs, strongly suggesting that they also interact with the ribosomal machinery. Accordingly, ablation of nucleus-to-cytosol supply of menRNA or mascRNA would cause imbalance within the translation system, consistent with the observed deregulation of multiple translation factors, tRNAs, tiRNAs, and ribosomal proteins in defective cells. Delineation of a specific molecular mechanism to prove this hypothesis is far beyond the scope of this study which attempted to first identify any distinct biological functions of menRNA and mascRNA within the *NEAT1-MALAT1* cluster.

Considering the minute and narrowly targeted genetic interventions employed, the extent of disturbances from key innate immune sensors to complex downstream sequelae, is unexpected. Beyond primary defects at sensor level, the grave loss of cytokine control, angiogenesis-modifying effects of DmenRNA and DmascRNA monocytes, and defects of key DmenRNA and DmascRNA macrophage functions, constitute the first known biological functionalities of these cytosolic molecules. From this starting point it appears warranted to generate murine models, with cell type-specific inducible knockout of menRNA or mascRNA only, to further elucidate their functions in disease models.

For future translational studies, our approach to study menRNA and mascRNA directly suggests new avenue since their highly dynamic levels may be more closely related to clinical parameters and clinical course than those of their nuclear precursors. They may also have value as therapeutic targets for pharmacological intervention since they are more easily accessible than their extremely complex nuclear-located precursor molecules. A prior observation that recombinant mascRNA 3 abolishes virus replication in cardiomyocytes does suggest potential of mascRNA- and menRNA-targeting interventions.

From an evolutionary perspective, the *NEAT1-MALAT1* genomic region appears as a highly integrated RNA processing circuitry critically contributing to immune homeostasis. Its components MEN-b, MEN-e, menRNA, *MALAT1*, *TALAM1*, and mascRNA are obviously set for well-balanced interactions with each other 17,170-175. Genetic ablation of any element therefore leads to major dysfunction.

**References**

1. Gast, M.*, et al.* Long noncoding RNA NEAT1 modulates immune cell functions and is suppressed in early onset myocardial infarction patients. *Cardiovasc Res* **115**, 1886-1906 (2019).

2. Gast, M.*, et al.* Immune system-mediated atherosclerosis caused by deficiency of long non-coding RNA MALAT1 in ApoE-/-mice. *Cardiovasc Res* **115**, 302-314 (2019).

3. Gast, M.*, et al.* Long noncoding RNA MALAT1-derived mascRNA is involved in cardiovascular innate immunity. *J Mol Cell Biol* **8**, 178-181 (2016).

4. Cremer, S.*, et al.* Hematopoietic Deficiency of the Long Noncoding RNA MALAT1 Promotes Atherosclerosis and Plaque Inflammation. *Circulation* **139**, 1320-1334 (2019).

5. Van't Klooster, C.C.*, et al.* The relation between systemic inflammation and incident cancer in patients with stable cardiovascular disease: a cohort study. *Eur Heart J* **40**, 3901-3909 (2019).

6. Lancellotti, P., Marechal, P., Donis, N. & Oury, C. Inflammation, cardiovascular disease, and cancer: a common link with far-reaching implications. *Eur Heart J* **40**, 3910-3912 (2019).

7. Poller, W.*, et al.* Non-coding RNAs in cardiovascular diseases: diagnostic and therapeutic perspectives. *Eur Heart J* **39**, 2704-2716 (2018).

8. Libby, P. Fanning the flames: inflammation in cardiovascular diseases. *Cardiovasc Res* **107**, 307-309 (2015).

9. Galon, J. & Bruni, D. Approaches to treat immune hot, altered and cold tumours with combination immunotherapies. *Nat Rev Drug Discov* **18**, 197-218 (2019).

10. Xu, Y.*, et al.* Long Non-coding RNA NEAT1 Alleviates Acute-on-Chronic Liver Failure Through Blocking TRAF6 Mediated Inflammatory Response. *Front Physiol* **10**, 1503 (2019).

11. Panigrahy, D.*, et al.* Preoperative stimulation of resolution and inflammation blockade eradicates micrometastases. *J Clin Invest* **129**, 2964-2979 (2019).

12. Modic, M.*, et al.* Cross-Regulation between TDP-43 and Paraspeckles Promotes Pluripotency-Differentiation Transition. *Mol Cell* **74**, 951-965 e913 (2019).

13. Zhang, P., Cao, L., Zhou, R., Yang, X. & Wu, M. The lncRNA Neat1 promotes activation of inflammasomes in macrophages. *Nat Commun* **10**, 1495 (2019).

14. Zhou, Z.W., Zheng, L.J., Ren, X., Li, A.P. & Zhou, W.S. LncRNA NEAT1 facilitates survival and angiogenesis in oxygen-glucose deprivation (OGD)-induced brain microvascular endothelial cells (BMECs) via targeting miR-377 and upregulating SIRT1, VEGFA, and BCL-XL. *Brain Res* **1707**, 90-98 (2019).

15. Simchovitz, A.*, et al.* NEAT1 is overexpressed in Parkinson's disease substantia nigra and confers drug-inducible neuroprotection from oxidative stress. *FASEB J* **33**, 11223-11234 (2019).

16. Huang, S.*, et al.* Long noncoding RNA NEAT1 accelerates the proliferation and fibrosis in diabetic nephropathy through activating Akt/mTOR signaling pathway. *J Cell Physiol* **234**, 11200-11207 (2019).

17. Yamazaki, T.*, et al.* Functional Domains of NEAT1 Architectural lncRNA Induce Paraspeckle Assembly through Phase Separation. *Mol Cell* **70**, 1038-1053 e1037 (2018).

18. Yamazaki, T., Fujikawa, C., Kubota, A., Takahashi, A. & Hirose, T. CRISPRa-mediated NEAT1 lncRNA upregulation induces formation of intact paraspeckles. *Biochem Biophys Res Commun* **504**, 218-224 (2018).

19. Wang, Y.*, et al.* Genome-wide screening of NEAT1 regulators reveals cross-regulation between paraspeckles and mitochondria. *Nat Cell Biol* **20**, 1145-1158 (2018).

20. Wilusz, J.E., Freier, S.M. & Spector, D.L. 3' end processing of a long nuclear-retained noncoding RNA yields a tRNA-like cytoplasmic RNA. *Cell* **135**, 919-932 (2008).

21. Kuhn, C.D., Wilusz, J.E., Zheng, Y., Beal, P.A. & Joshua-Tor, L. On-enzyme refolding permits small RNA and tRNA surveillance by the CCA-adding enzyme. *Cell* **160**, 644-658 (2015).

22. Pickar-Oliver, A. & Gersbach, C.A. The next generation of CRISPR-Cas technologies and applications. *Nat Rev Mol Cell Biol* **20**, 490-507 (2019).

23. Hille, F.*, et al.* The Biology of CRISPR-Cas: Backward and Forward. *Cell* **172**, 1239-1259 (2018).

24. Musunuru, K. Genome Editing: The Recent History and Perspective in Cardiovascular Diseases. *J Am Coll Cardiol* **70**, 2808-2821 (2017).

25. Hille, F. & Charpentier, E. CRISPR-Cas: biology, mechanisms and relevance. *Philos Trans R Soc Lond B Biol Sci* **371**(2016).

26. Caruso, R., Warner, N., Inohara, N. & Nunez, G. NOD1 and NOD2: signaling, host defense, and inflammatory disease. *Immunity* **41**, 898-908 (2014).

27. Trindade, B.C. & Chen, G.Y. NOD1 and NOD2 in inflammatory and infectious diseases. *Immunol Rev* **297**, 139-161 (2020).

28. Negroni, A., Pierdomenico, M., Cucchiara, S. & Stronati, L. NOD2 and inflammation: current insights. *J Inflamm Res* **11**, 49-60 (2018).

29. Liu, H.Q.*, et al.* NOD2-mediated innate immune signaling regulates the eicosanoids in atherosclerosis. *Arterioscler Thromb Vasc Biol* **33**, 2193-2201 (2013).

30. Yuan, H.*, et al.* Pivotal role of NOD2 in inflammatory processes affecting atherosclerosis and periodontal bone loss. *Proc Natl Acad Sci U S A* **110**, E5059-5068 (2013).

31. Johansson, M.E.*, et al.* Innate immune receptor NOD2 promotes vascular inflammation and formation of lipid-rich necrotic cores in hypercholesterolemic mice. *Eur J Immunol* **44**, 3081-3092 (2014).

32. Liu, Y.*, et al.* NOD2 contributes to myocardial ischemia/reperfusion injury by regulating cardiomyocyte apoptosis and inflammation. *Life Sci* **149**, 10-17 (2016).

33. Chen, L., Cao, S.Q., Lin, Z.M., He, S.J. & Zuo, J.P. NOD-like receptors in autoimmune diseases. *Acta Pharmacol Sin* (2021).

34. Geirsson, A., Paliwal, I., Lynch, R.J., Bothwell, A.L. & Hammond, G.L. Class II transactivator promoter activity is suppressed through regulation by a trophoblast noncoding RNA. *Transplantation* **76**, 387-394 (2003).

35. Geirsson, A., Lynch, R.J., Paliwal, I., Bothwell, A.L. & Hammond, G.L. Human trophoblast noncoding RNA suppresses CIITA promoter III activity in murine B-lymphocytes. *Biochem Biophys Res Commun* **301**, 718-724 (2003).

36. Geirsson, A., Bothwell, A.L. & Hammond, G.L. Inhibition of alloresponse by a human trophoblast non-coding RNA suppressing class II transactivator promoter III and major histocompatibility class II expression in murine B-lymphocytes. *J Heart Lung Transplant* **23**, 1077-1081 (2004).

37. Eren, E., Berber, M. & Ozoren, N. NLRC3 protein inhibits inflammation by disrupting NALP3 inflammasome assembly via competition with the adaptor protein ASC for pro-caspase-1 binding. *J Biol Chem* **292**, 12691-12701 (2017).

38. Gultekin, Y., Eren, E. & Ozoren, N. Overexpressed NLRC3 acts as an anti-inflammatory cytosolic protein. *J Innate Immun* **7**, 25-36 (2015).

39. Zheng, D., Liwinski, T. & Elinav, E. Inflammasome activation and regulation: toward a better understanding of complex mechanisms. *Cell Discov* **6**, 36 (2020).

40. Sundaram, B. & Kanneganti, T.D. Advances in Understanding Activation and Function of the NLRC4 Inflammasome. *Int J Mol Sci* **22**(2021).

41. Swanson, K.V., Deng, M. & Ting, J.P. The NLRP3 inflammasome: molecular activation and regulation to therapeutics. *Nat Rev Immunol* **19**, 477-489 (2019).

42. Schnappauf, O., Chae, J.J., Kastner, D.L. & Aksentijevich, I. The Pyrin Inflammasome in Health and Disease. *Front Immunol* **10**, 1745 (2019).

43. Sun, R., Hedl, M. & Abraham, C. Twist1 and Twist2 Induce Human Macrophage Memory upon Chronic Innate Receptor Treatment by HDAC-Mediated Deacetylation of Cytokine Promoters. *J Immunol* **202**, 3297-3308 (2019).

44. Bailey, C.C., Zhong, G., Huang, I.C. & Farzan, M. IFITM-Family Proteins: The Cell's First Line of Antiviral Defense. *Annu Rev Virol* **1**, 261-283 (2014).

45. Tremblay, M., Sanchez-Ferras, O. & Bouchard, M. GATA transcription factors in development and disease. *Development* **145**(2018).

46. Du, M.*, et al.* Inhibition of NFAT suppresses foam cell formation and the development of diet-induced atherosclerosis. *FASEB J* **35**, e21951 (2021).

47. Ignatova, V.V., Jansen, P., Baltissen, M.P., Vermeulen, M. & Schneider, R. The interactome of a family of potential methyltransferases in HeLa cells. *Sci Rep* **9**, 6584 (2019).

48. Zhang, B.*, et al.* Identification of key gene modules and pathways of human platelet transcriptome in acute myocardial infarction patients through co-expression network. *Am J Transl Res* **13**, 3890-3905 (2021).

49. Godfrey, A.K.*, et al.* Quantitative analysis of Y-Chromosome gene expression across 36 human tissues. *Genome Res* **30**, 860-873 (2020).

50. Aguilo, F.*, et al.* Deposition of 5-Methylcytosine on Enhancer RNAs Enables the Coactivator Function of PGC-1alpha. *Cell Rep* **14**, 479-492 (2016).

51. D'Souza, A.R. & Minczuk, M. Mitochondrial transcription and translation: overview. *Essays Biochem* **62**, 309-320 (2018).

52. Suzuki, T.*, et al.* Complete chemical structures of human mitochondrial tRNAs. *Nat Commun* **11**, 4269 (2020).

53. de Crecy-Lagard, V.*, et al.* Matching tRNA modifications in humans to their known and predicted enzymes. *Nucleic Acids Res* **47**, 2143-2159 (2019).

54. Van Haute, L.*, et al.* NSUN2 introduces 5-methylcytosines in mammalian mitochondrial tRNAs. *Nucleic Acids Res* **47**, 8720-8733 (2019).

55. Li, X.*, et al.* Base-Resolution Mapping Reveals Distinct m(1)A Methylome in Nuclear- and Mitochondrial-Encoded Transcripts. *Mol Cell* **68**, 993-1005 e1009 (2017).

56. Jia, Z.*, et al.* A coronary artery disease-associated tRNAThr mutation altered mitochondrial function, apoptosis and angiogenesis. *Nucleic Acids Res* **47**, 2056-2074 (2019).

57. Hunsucker, S.A., Spychala, J. & Mitchell, B.S. Human cytosolic 5'-nucleotidase I: characterization and role in nucleoside analog resistance. *J Biol Chem* **276**, 10498-10504 (2001).

58. Zhang, Q.*, et al.* The long noncoding RNA ROCKI regulates inflammatory gene expression. *EMBO J* **38**(2019).

59. Iyer, D.N.*, et al.* Pathophysiological roles of myristoylated alanine-rich C-kinase substrate (MARCKS) in hematological malignancies. *Biomark Res* **9**, 34 (2021).

60. Liu, J.*, et al.* MARCKS cooperates with NKAP to activate NF-kB signaling in smoke-related lung cancer. *Theranostics* **11**, 4122-4136 (2021).

61. Ard, R.*, et al.* PKCalpha-mediated phosphorylation of the diacylglycerol kinase zeta MARCKS domain switches cell migration modes by regulating interactions with Rac1 and RhoA. *J Biol Chem*, 100516 (2021).

62. Yue, Y.*, et al.* IL4I1 Is a Novel Regulator of M2 Macrophage Polarization That Can Inhibit T Cell Activation via L-Tryptophan and Arginine Depletion and IL-10 Production. *PLoS One* **10**, e0142979 (2015).

63. Sadik, A.*, et al.* IL4I1 Is a Metabolic Immune Checkpoint that Activates the AHR and Promotes Tumor Progression. *Cell* **182**, 1252-1270 e1234 (2020).

64. Junttila, I.S. Tuning the Cytokine Responses: An Update on Interleukin (IL)-4 and IL-13 Receptor Complexes. *Front Immunol* **9**, 888 (2018).

65. Liu, X.*, et al.* Interleukin-4 Is Essential for Microglia/Macrophage M2 Polarization and Long-Term Recovery After Cerebral Ischemia. *Stroke* **47**, 498-504 (2016).

66. Callejas, B.E.*, et al.* Interleukin-4 Programmed Macrophages Suppress Colitis and Do Not Enhance Infectious-Colitis, Inflammation-Associated Colon Cancer or Airway Hypersensitivity. *Front Immunol* **12**, 744738 (2021).

67. Takenaka, M., Yabuta, A., Takahashi, Y. & Takakura, Y. Interleukin-4-carrying small extracellular vesicles with a high potential as anti-inflammatory therapeutics based on modulation of macrophage function. *Biomaterials* **278**, 121160 (2021).

68. Shiga, T.*, et al.* Usefulness of Interleukin-18 as a Diagnostic Biomarker to Differentiate Adult-Onset Still's Disease With/Without Macrophage Activation Syndrome From Other Secondary Hemophagocytic Lymphohistiocytosis in Adults. *Front Immunol* **12**, 750114 (2021).

69. Zhao, G.*, et al.* Interleukin-18 accelerates cardiac inflammation and dysfunction during ischemia/reperfusion injury by transcriptional activation of CXCL16. *Cell Signal* **87**, 110141 (2021).

70. Scheibenbogen, C., Keilholz, U., Richter, M., Andreesen, R. & Hunstein, W. The interleukin-2 receptor in human monocytes and macrophages: regulation of expression and release of the alpha and beta chains (p55 and p75). *Res Immunol* **143**, 33-37 (1992).

71. Matsui, K. Role of interleukin-2 receptor expression on macrophages from Salmonella-infected mice. *FEMS Immunol Med Microbiol* **24**, 97-103 (1999).

72. Nelson, B.J., Danielpour, D., Rossio, J.L., Turpin, J. & Nacy, C.A. Interleukin-2 suppresses activated macrophage intracellular killing activity by inducing macrophages to secrete TGF-beta. *J Leukoc Biol* **55**, 81-90 (1994).

73. Lohmann-Matthes, M.L., Emmendoerffer, A. & Hao, L. Influence of interleukin-2 on the differentiation of macrophages. *Pathobiology* **59**, 117-121 (1991).

74. Li, H.*, et al.* Macrophage precursor cells produce perforin and perform Yac-1 lytic activity in response to stimulation with interleukin-2. *J Leukoc Biol* **56**, 117-123 (1994).

75. Li, H., Kniep, E., Emmendorffer, A. & Lohmann-Matthes, M.L. Differentiation of macrophage precursors to cells with LAK activity under the influence of CSF-1 and high dose IL-2. *Scand J Immunol* **33**, 511-520 (1991).

76. Li, H., Schwinzer, R., Baccarini, M. & Lohmann-Matthes, M.L. Cooperative effects of colony-stimulating factor 1 and recombinant interleukin 2 on proliferation and induction of cytotoxicity of macrophage precursors generated from mouse bone marrow cell cultures. *J Exp Med* **169**, 973-986 (1989).

77. Kim, E.T.*, et al.* Comparative proteomics identifies Schlafen 5 (SLFN5) as a herpes simplex virus restriction factor that suppresses viral transcription. *Nat Microbiol* **6**, 234-245 (2021).

78. Arslan, A.D.*, et al.* Human SLFN5 is a transcriptional co-repressor of STAT1-mediated interferon responses and promotes the malignant phenotype in glioblastoma. *Oncogene* **36**, 6006-6019 (2017).

79. Fischietti, M.*, et al.* Schlafen 5 as a novel therapeutic target in pancreatic ductal adenocarcinoma. *Oncogene* **40**, 3273-3286 (2021).

80. Metzner, F.J., Huber, E., Hopfner, K.P. & Lammens, K. Structural and biochemical characterization of human Schlafen 5. *Nucleic Acids Res* **50**, 1147-1161 (2022).

81. Prabhudas, M.*, et al.* Standardizing scavenger receptor nomenclature. *J Immunol* **192**, 1997-2006 (2014).

82. Griffiths, M.R., Botto, M., Morgan, B.P., Neal, J.W. & Gasque, P. CD93 regulates central nervous system inflammation in two mouse models of autoimmune encephalomyelitis. *Immunology* **155**, 346-355 (2018).

83. McCormack, R. & Podack, E.R. Perforin-2/Mpeg1 and other pore-forming proteins throughout evolution. *J Leukoc Biol* **98**, 761-768 (2015).

84. Bassilana, F., Nash, M. & Ludwig, M.G. Adhesion G protein-coupled receptors: opportunities for drug discovery. *Nat Rev Drug Discov* **18**, 869-884 (2019).

85. Singh, K.*, et al.* Neuronal Growth and Behavioral Alterations in Mice Deficient for the Psychiatric Disease-Associated Negr1 Gene. *Front Mol Neurosci* **11**, 30 (2018).

86. Kim, H., Hwang, J.S., Lee, B., Hong, J. & Lee, S. Newly Identified Cancer-Associated Role of Human Neuronal Growth Regulator 1 (NEGR1). *J Cancer* **5**, 598-608 (2014).

87. Guo, H.*, et al.* NCKAP1 Disruptive Variants Lead to a Neurodevelopmental Disorder with Core Features of Autism. *Am J Hum Genet* **107**, 963-976 (2020).

88. Teng, Y.*, et al.* The WASF3-NCKAP1-CYFIP1 Complex Is Essential for Breast Cancer Metastasis. *Cancer Res* **76**, 5133-5142 (2016).

89. Xiong, Y.*, et al.* Nck-associated protein 1 associates with HSP90 to drive metastasis in human non-small-cell lung cancer. *J Exp Clin Cancer Res* **38**, 122 (2019).

90. Swaminathan, K.*, et al.* The RAC1 Target NCKAP1 Plays a Crucial Role in the Progression of Braf;Pten-Driven Melanoma in Mice. *J Invest Dermatol* **141**, 628-637 e615 (2021).

91. Afzal, T.A.*, et al.* NCK Associated Protein 1 Modulated by miRNA-214 Determines Vascular Smooth Muscle Cell Migration, Proliferation, and Neointima Hyperplasia. *J Am Heart Assoc* **5**(2016).

92. Lyu, Q.*, et al.* SENCR stabilizes vascular endothelial cell adherens junctions through interaction with CKAP4. *Proc Natl Acad Sci U S A* **116**, 546-555 (2019).

93. Yu, B. & Wang, S. Angio-LncRs: LncRNAs that regulate angiogenesis and vascular disease. *Theranostics* **8**, 3654-3675 (2018).

94. Boulberdaa, M.*, et al.* A Role for the Long Noncoding RNA SENCR in Commitment and Function of Endothelial Cells. *Mol Ther* **24**, 978-990 (2016).

95. DeNardo, D.G. & Ruffell, B. Macrophages as regulators of tumour immunity and immunotherapy. *Nat Rev Immunol* **19**, 369-382 (2019).

96. Rashad, S., Niizuma, K. & Tominaga, T. tRNA cleavage: a new insight. *Neural Regen Res* **15**, 47-52 (2020).

97. Frantz, S., Vincent, K.A., Feron, O. & Kelly, R.A. Innate immunity and angiogenesis. *Circ Res* **96**, 15-26 (2005).

98. Sheng, J. & Xu, Z. Three decades of research on angiogenin: a review and perspective. *Acta Biochim Biophys Sin (Shanghai)* **48**, 399-410 (2016).

99. Prehn, J.H.M. & Jirstrom, E. Angiogenin and tRNA fragments in Parkinson's disease and neurodegeneration. *Acta Pharmacol Sin* **41**, 442-446 (2020).

100. Lyons, S.M., Fay, M.M., Akiyama, Y., Anderson, P.J. & Ivanov, P. RNA biology of angiogenin: Current state and perspectives. *RNA Biol* **14**, 171-178 (2017).

101. Zong, T.*, et al.* tsRNAs: Novel small molecules from cell function and regulatory mechanism to therapeutic targets. *Cell Prolif* **54**, e12977 (2021).

102. Sarangdhar, M.A. & Allam, R. Angiogenin (ANG)-Ribonuclease Inhibitor (RNH1) System in Protein Synthesis and Disease. *Int J Mol Sci* **22**(2021).

103. Hogg, M.C.*, et al.* 5'ValCAC tRNA fragment generated as part of a protective angiogenin response provides prognostic value in amyotrophic lateral sclerosis. *Brain Commun* **2**, fcaa138 (2020).

104. Pereira, M.*, et al.* m(5)U54 tRNA Hypomodification by Lack of TRMT2A Drives the Generation of tRNA-Derived Small RNAs. *Int J Mol Sci* **22**(2021).

105. Yue, T.*, et al.* SLFN2 protection of tRNAs from stress-induced cleavage is essential for T cell-mediated immunity. *Science* **372**(2021).

106. Akiyama, Y., Tomioka, Y., Abe, T., Anderson, P. & Ivanov, P. In lysate RNA digestion provides insights into the angiogenin's specificity towards transfer RNAs. *RNA Biol*, 1-10 (2021).

107. Chistiakov, D.A., Melnichenko, A.A., Myasoedova, V.A., Grechko, A.V. & Orekhov, A.N. Mechanisms of foam cell formation in atherosclerosis. *J Mol Med (Berl)* **95**, 1153-1165 (2017).

108. Canton, J., Neculai, D. & Grinstein, S. Scavenger receptors in homeostasis and immunity. *Nat Rev Immunol* **13**, 621-634 (2013).

109. Hsieh, W.Y.*, et al.* Toll-Like Receptors Induce Signal-Specific Reprogramming of the Macrophage Lipidome. *Cell Metab* **32**, 128-143 e125 (2020).

110. Remmerie, A. & Scott, C.L. Macrophages and lipid metabolism. *Cell Immunol* **330**, 27-42 (2018).

111. Schulman, I.G. Liver X receptors link lipid metabolism and inflammation. *FEBS Lett* **591**, 2978-2991 (2017).

112. Castrillo, A. & Tontonoz, P. Nuclear receptors in macrophage biology: at the crossroads of lipid metabolism and inflammation. *Annu Rev Cell Dev Biol* **20**, 455-480 (2004).

113. Vogel, A., Brunner, J.S., Hajto, A., Sharif, O. & Schabbauer, G. Lipid scavenging macrophages and inflammation. *Biochim Biophys Acta Mol Cell Biol Lipids* **1867**, 159066 (2022).

114. Nimmerjahn, F. & Ravetch, J.V. Fcgamma receptors as regulators of immune responses. *Nat Rev Immunol* **8**, 34-47 (2008).

115. Clynes, R.*, et al.* Modulation of immune complex-induced inflammation in vivo by the coordinate expression of activation and inhibitory Fc receptors. *J Exp Med* **189**, 179-185 (1999).

116. Yuasa, T.*, et al.* Deletion of fcgamma receptor IIB renders H-2(b) mice susceptible to collagen-induced arthritis. *J Exp Med* **189**, 187-194 (1999).

117. Takai, T., Ono, M., Hikida, M., Ohmori, H. & Ravetch, J.V. Augmented humoral and anaphylactic responses in Fc gamma RII-deficient mice. *Nature* **379**, 346-349 (1996).

118. Murugaiah, V.*, et al.* Complement Proteins as Soluble Pattern Recognition Receptors for Pathogenic Viruses. *Viruses* **13**(2021).

119. Fagerholm, S.C., MacPherson, M., James, M.J., Sevier-Guy, C. & Lau, C.S. The CD11b-integrin (ITGAM) and systemic lupus erythematosus. *Lupus* **22**, 657-663 (2013).

120. Browne, T., Dearman, R.J. & Poles, A. Human neutrophil antigens: Nature, clinical significance and detection. *Int J Immunogenet* **48**, 145-156 (2021).

121. Liang, Q., Su, L., Zhang, D. & Jiao, J. CD93 negatively regulates astrogenesis in response to MMRN2 through the transcriptional repressor ZFP503 in the developing brain. *Proc Natl Acad Sci U S A* **117**, 9413-9422 (2020).

122. Sun, Y.*, et al.* Blockade of the CD93 pathway normalizes tumor vasculature to facilitate drug delivery and immunotherapy. *Sci Transl Med* **13**(2021).

123. Greenlee-Wacker, M.C., Galvan, M.D. & Bohlson, S.S. CD93: recent advances and implications in disease. *Curr Drug Targets* **13**, 411-420 (2012).

124. Kielar, M.*, et al.* Soluble Complement Component 1q Receptor 1 (sCD93) Is Associated with Graft Function in Kidney Transplant Recipients. *Biomolecules* **11**(2021).

125. Chevrier, S.*, et al.* CD93 is required for maintenance of antibody secretion and persistence of plasma cells in the bone marrow niche. *Proc Natl Acad Sci U S A* **106**, 3895-3900 (2009).

126. Haralambieva, I.H.*, et al.* Whole Transcriptome Profiling Identifies CD93 and Other Plasma Cell Survival Factor Genes Associated with Measles-Specific Antibody Response after Vaccination. *PLoS One* **11**, e0160970 (2016).

127. Tosi, G.M.*, et al.* CD93 as a Potential Target in Neovascular Age-Related Macular Degeneration. *J Cell Physiol* **232**, 1767-1773 (2017).

128. Galvagni, F.*, et al.* Dissecting the CD93-Multimerin 2 interaction involved in cell adhesion and migration of the activated endothelium. *Matrix Biol* **64**, 112-127 (2017).

129. Alehagen, U., Shamoun, L. & Wagsater, D. Genetic variance and plasma concentration of CD93 is associated with cardiovascular mortality: Results from a 6.7year followup of a healthy communityliving elderly population. *Mol Med Rep* **22**, 4629-4636 (2020).

130. Nativel, B.*, et al.* CD93 is a cell surface lectin receptor involved in the control of the inflammatory response stimulated by exogenous DNA. *Immunology* **158**, 85-93 (2019).

131. Norsworthy, P.J.*, et al.* Murine CD93 (C1qRp) contributes to the removal of apoptotic cells in vivo but is not required for C1q-mediated enhancement of phagocytosis. *J Immunol* **172**, 3406-3414 (2004).

132. Youn, J.C.*, et al.* Soluble CD93 levels in patients with acute myocardial infarction and its implication on clinical outcome. *PLoS One* **9**, e96538 (2014).

133. Yao, Y., Xu, X.H. & Jin, L. Macrophage Polarization in Physiological and Pathological Pregnancy. *Front Immunol* **10**, 792 (2019).

134. Raggi, F.*, et al.* Regulation of Human Macrophage M1-M2 Polarization Balance by Hypoxia and the Triggering Receptor Expressed on Myeloid Cells-1. *Front Immunol* **8**, 1097 (2017).

135. Fore, F., Indriputri, C., Mamutse, J. & Nugraha, J. TLR10 and Its Unique Anti-Inflammatory Properties and Potential Use as a Target in Therapeutics. *Immune Netw* **20**, e21 (2020).

136. Oosting, M.*, et al.* Human TLR10 is an anti-inflammatory pattern-recognition receptor. *Proc Natl Acad Sci U S A* **111**, E4478-4484 (2014).

137. Pyonteck, S.M.*, et al.* CSF-1R inhibition alters macrophage polarization and blocks glioma progression. *Nat Med* **19**, 1264-1272 (2013).

138. Brocheriou, I.*, et al.* Antagonistic regulation of macrophage phenotype by M-CSF and GM-CSF: implication in atherosclerosis. *Atherosclerosis* **214**, 316-324 (2011).

139. Cannarile, M.A.*, et al.* Colony-stimulating factor 1 receptor (CSF1R) inhibitors in cancer therapy. *J Immunother Cancer* **5**, 53 (2017).

140. Sjaarda, J.*, et al.* Blood CSF1 and CXCL12 as Causal Mediators of Coronary Artery Disease. *J Am Coll Cardiol* **72**, 300-310 (2018).

141. Liu, Y.*, et al.* Concentration-dependent effects of CSF1R inhibitors on oligodendrocyte progenitor cells ex vivo and in vivo. *Exp Neurol* **318**, 32-41 (2019).

142. Ramesh, A., Kumar, S., Nandi, D. & Kulkarni, A. CSF1R- and SHP2-Inhibitor-Loaded Nanoparticles Enhance Cytotoxic Activity and Phagocytosis in Tumor-Associated Macrophages. *Adv Mater* **31**, e1904364 (2019).

143. Rojo, R.*, et al.* Deletion of a Csf1r enhancer selectively impacts CSF1R expression and development of tissue macrophage populations. *Nat Commun* **10**, 3215 (2019).

144. Hagan, N.*, et al.* CSF1R signaling is a regulator of pathogenesis in progressive MS. *Cell Death Dis* **11**, 904 (2020).

145. Henry, R.J.*, et al.* Microglial Depletion with CSF1R Inhibitor During Chronic Phase of Experimental Traumatic Brain Injury Reduces Neurodegeneration and Neurological Deficits. *J Neurosci* **40**, 2960-2974 (2020).

146. Hume, D.A.*, et al.* Phenotypic impacts of CSF1R deficiencies in humans and model organisms. *J Leukoc Biol* **107**, 205-219 (2020).

147. Xun, Q., Wang, Z., Hu, X., Ding, K. & Lu, X. Small-Molecule CSF1R Inhibitors as Anticancer Agents. *Curr Med Chem* **27**, 3944-3966 (2020).

148. Denny, W.A. & Flanagan, J.U. Small-molecule CSF1R kinase inhibitors; review of patents 2015-present. *Expert Opin Ther Pat* **31**, 107-117 (2021).

149. Mickeviciute, G.C.*, et al.* Neuroimaging phenotypes of CSF1R-related leukoencephalopathy: Systematic review, meta-analysis, and imaging recommendations. *J Intern Med* (2021).

150. Gao, Y.*, et al.* LncRNA NEAT1 sponges miR-214 to regulate M2 macrophage polarization by regulation of B7-H3 in multiple myeloma. *Mol Immunol* **117**, 20-28 (2020).

151. Zhang, M.*, et al.* Knockdown of NEAT1 induces tolerogenic phenotype in dendritic cells by inhibiting activation of NLRP3 inflammasome. *Theranostics* **9**, 3425-3442 (2019).

152. Kenneweg, F.*, et al.* Long Noncoding RNA-Enriched Vesicles Secreted by Hypoxic Cardiomyocytes Drive Cardiac Fibrosis. *Mol Ther Nucleic Acids* **18**, 363-374 (2019).

153. Wu, H.J.*, et al.* Long non-coding RNA NEAT1 modulates hypoxia/reoxygenation-induced cardiomyocyte injury via targeting microRNA-520a. *Exp Ther Med* **18**, 2199-2206 (2019).

154. Ma, M.*, et al.* Long non-coding RNA nuclear-enriched abundant transcript 1 inhibition blunts myocardial ischemia reperfusion injury via autophagic flux arrest and apoptosis in streptozotocin-induced diabetic rats. *Atherosclerosis* **277**, 113-122 (2018).

155. Ruan, Z., Wang, S., Yu, W. & Deng, F. LncRNA NEAT1 aggravates diabetic myocardial ischemia-reperfusion injury through regulating PINK1 by targeting miR-27b. *Int J Cardiol* **286**, 136 (2019).

156. Chen, H., Xia, W. & Hou, M. LncRNA-NEAT1 from the competing endogenous RNA network promotes cardioprotective efficacy of mesenchymal stem cell-derived exosomes induced by macrophage migration inhibitory factor via the miR-142-3p/FOXO1 signaling pathway. *Stem Cell Res Ther* **11**, 31 (2020).

157. Lino Cardenas, C.L.*, et al.* An HDAC9-MALAT1-BRG1 complex mediates smooth muscle dysfunction in thoracic aortic aneurysm. *Nat Commun* **9**, 1009 (2018).

158. Lino Cardenas, C.L.*, et al.* HDAC9 complex inhibition improves smooth muscle-dependent stenotic vascular disease. *JCI Insight* **4**(2019).

159. Li, X., Ye, S. & Lu, Y. Long non-coding RNA NEAT1 overexpression associates with increased exacerbation risk, severity, and inflammation, as well as decreased lung function through the interaction with microRNA-124 in asthma. *J Clin Lab Anal* **34**, e23023 (2020).

160. Boros, F.A., Maszlag-Torok, R., Vecsei, L. & Klivenyi, P. Increased level of NEAT1 long non-coding RNA is detectable in peripheral blood cells of patients with Parkinson's disease. *Brain Res* **1730**, 146672 (2020).

161. Knutsen, E.*, et al.* The expression of the long NEAT1_2 isoform is associated with human epidermal growth factor receptor 2-positive breast cancers. *Sci Rep* **10**, 1277 (2020).

162. Smith, K.P., Hall, L.L. & Lawrence, J.B. Nuclear hubs built on RNAs and clustered organization of the genome. *Curr Opin Cell Biol* **64**, 67-76 (2020).

163. Banani, S.F., Lee, H.O., Hyman, A.A. & Rosen, M.K. Biomolecular condensates: organizers of cellular biochemistry. *Nat Rev Mol Cell Biol* **18**, 285-298 (2017).

164. Chen, Y.*, et al.* Mapping 3D genome organization relative to nuclear compartments using TSA-Seq as a cytological ruler. *J Cell Biol* **217**, 4025-4048 (2018).

165. Quinodoz, S.A.*, et al.* Higher-Order Inter-chromosomal Hubs Shape 3D Genome Organization in the Nucleus. *Cell* **174**, 744-757 e724 (2018).

166. Chen, W.*, et al.* RNAs as Proximity-Labeling Media for Identifying Nuclear Speckle Positions Relative to the Genome. *iScience* **4**, 204-215 (2018).

167. Fei, J.*, et al.* Quantitative analysis of multilayer organization of proteins and RNA in nuclear speckles at super resolution. *J Cell Sci* **130**, 4180-4192 (2017).

168. Yin, S.*, et al.* Transcriptomic and open chromatin atlas of high-resolution anatomical regions in the rhesus macaque brain. *Nat Commun* **11**, 474 (2020).

169. Machyna, M., Kiefer, L. & Simon, M.D. Enhanced nucleotide chemistry and toehold nanotechnology reveals lncRNA spreading on chromatin. *Nat Struct Mol Biol* **27**, 297-304 (2020).

170. Nakagawa, S.*, et al.* Malat1 is not an essential component of nuclear speckles in mice. *RNA* **18**, 1487-1499 (2012).

171. Naganuma, T.*, et al.* Alternative 3'-end processing of long noncoding RNA initiates construction of nuclear paraspeckles. *EMBO J* **31**, 4020-4034 (2012).

172. Nakagawa, S.*, et al.* The lncRNA Neat1 is required for corpus luteum formation and the establishment of pregnancy in a subpopulation of mice. *Development* **141**, 4618-4627 (2014).

173. West, J.A.*, et al.* Structural, super-resolution microscopy analysis of paraspeckle nuclear body organization. *J Cell Biol* **214**, 817-830 (2016).

174. Nakagawa, S., Yamazaki, T. & Hirose, T. Molecular dissection of nuclear paraspeckles: towards understanding the emerging world of the RNP milieu. *Open Biol* **8**(2018).

175. Isobe, M.*, et al.* Forced isoform switching of Neat1_1 to Neat1_2 leads to the loss of Neat1_1 and the hyperformation of paraspeckles but does not affect the development and growth of mice. *RNA* **26**, 251-264 (2020).

176. Zong, X.*, et al.* Natural antisense RNA promotes 3' end processing and maturation of MALAT1 lncRNA. *Nucleic Acids Res* **44**, 2898-2908 (2016).

177. Apostolakis, S., Vogiatzi, K., Amanatidou, V. & Spandidos, D.A. Interleukin 8 and cardiovascular disease. *Cardiovasc Res* **84**, 353-360 (2009).

178. Velasquez, I.M.*, et al.* Association of interleukin 8 with myocardial infarction: results from the Stockholm Heart Epidemiology Program. *Int J Cardiol* **172**, 173-178 (2014).

179. Cimini, F.A.*, et al.* Circulating IL-8 levels are increased in patients with type 2 diabetes and associated with worse inflammatory and cardiometabolic profile. *Acta Diabetol* **54**, 961-967 (2017).

180. Kienhorst, L.B.*, et al.* Gout Is a Chronic Inflammatory Disease in Which High Levels of Interleukin-8 (CXCL8), Myeloid-Related Protein 8/Myeloid-Related Protein 14 Complex, and an Altered Proteome Are Associated With Diabetes Mellitus and Cardiovascular Disease. *Arthritis Rheumatol* **67**, 3303-3313 (2015).

181. Husebye, T.*, et al.* Association of interleukin 8 and myocardial recovery in patients with ST-elevation myocardial infarction complicated by acute heart failure. *PLoS One* **9**, e112359 (2014).

182. Zhang, Q.*, et al.* Association between interleukin-8 gene -251 A/T polymorphism and the risk of coronary artery disease: A meta-analysis. *Medicine (Baltimore)* **98**, e17866 (2019).

183. Hartman, M.H.T., Groot, H.E., Leach, I.M., Karper, J.C. & van der Harst, P. Translational overview of cytokine inhibition in acute myocardial infarction and chronic heart failure. *Trends Cardiovasc Med* **28**, 369-379 (2018).

184. Moreno Velasquez, I.*, et al.* Serum IL8 is not associated with cardiovascular events but with all-cause mortality. *BMC Cardiovasc Disord* **19**, 34 (2019).

185. Hansen, M.*, et al.* Inflammatory biomarkers in patients in Simvastatin treatment: No effect of co-enzyme Q10 supplementation. *Cytokine* **113**, 393-399 (2019).

186. Szomjak, E.*, et al.* Immunological parameters, including CXCL8 (IL-8) characterize cerebro- and cardiovascular events in patients with peripheral artery diseases. *Scand J Immunol* **71**, 283-291 (2010).

187. Chernykh, E.R.*, et al.* Safety and Therapeutic Potential of M2 Macrophages in Stroke Treatment. *Cell Transplant* **25**, 1461-1471 (2016).

188. Marino, F.*, et al.* Production of IL-8, VEGF and Elastase by Circulating and Intraplaque Neutrophils in Patients with Carotid Atherosclerosis. *PLoS One* **10**, e0124565 (2015).

189. An, Z.*, et al.* Neutrophil extracellular traps induced by IL-8 aggravate atherosclerosis via activation NF-kappaB signaling in macrophages. *Cell Cycle* **18**, 2928-2938 (2019).

190. Gerszten, R.E.*, et al.* MCP-1 and IL-8 trigger firm adhesion of monocytes to vascular endothelium under flow conditions. *Nature* **398**, 718-723 (1999).

191. Xie, S.J.*, et al.* mascRNA and its parent lncRNA MALAT1 promote proliferation and metastasis of hepatocellular carcinoma cells by activating ERK/MAPK signaling pathway. *Cell Death Discov* **7**, 110 (2021).

192. Moss, W.N. RNA2DMut: a web tool for the design and analysis of RNA structure mutations. *RNA* **24**, 273-286 (2018).

193. Lu, X.*, et al.* The tRNA-like small noncoding RNA mascRNA promotes global protein translation. *EMBO Rep* **21**, e49684 (2020).

194. Zhang, B.*, et al.* Identification and Characterization of a Class of MALAT1-like Genomic Loci. *Cell Rep* **19**, 1723-1738 (2017).

195. Akkuratov, E.E.*, et al.* Bioinformatics analysis of plant orthologous introns: identification of an intronic tRNA-like sequence. *Gene* **548**, 81-90 (2014).

196. Wilusz, J.E., Whipple, J.M., Phizicky, E.M. & Sharp, P.A. tRNAs marked with CCACCA are targeted for degradation. *Science* **334**, 817-821 (2011).

197. Betat, H. & Morl, M. The CCA-adding enzyme: A central scrutinizer in tRNA quality control. *Bioessays* **37**, 975-982 (2015).

198. Wilusz, J.E. Controlling translation via modulation of tRNA levels. *Wiley Interdiscip Rev RNA* **6**, 453-470 (2015).

199. Wellner, K., Czech, A., Ignatova, Z., Betat, H. & Morl, M. Examining tRNA 3'-ends in Escherichia coli: teamwork between CCA-adding enzyme, RNase T, and RNase R. *RNA* **24**, 361-370 (2018).

200. Mavrommatis, E., Fish, E.N. & Platanias, L.C. The schlafen family of proteins and their regulation by interferons. *J Interferon Cytokine Res* **33**, 206-210 (2013).

201. Liu, F., Zhou, P., Wang, Q., Zhang, M. & Li, D. The Schlafen family: complex roles in different cell types and virus replication. *Cell Biol Int* **42**, 2-8 (2018).

202. Puck, A.*, et al.* Expression and regulation of Schlafen (SLFN) family members in primary human monocytes, monocyte-derived dendritic cells and T cells. *Results Immunol* **5**, 23-32 (2015).

203. Sohn, W.J.*, et al.* Novel transcriptional regulation of the schlafen-2 gene in macrophages in response to TLR-triggered stimulation. *Mol Immunol* **44**, 3273-3282 (2007).

204. Li, M.*, et al.* Codon-usage-based inhibition of HIV protein synthesis by human schlafen 11. *Nature* **491**, 125-128 (2012).

205. Geserick, P., Kaiser, F., Klemm, U., Kaufmann, S.H. & Zerrahn, J. Modulation of T cell development and activation by novel members of the Schlafen (slfn) gene family harbouring an RNA helicase-like motif. *Int Immunol* **16**, 1535-1548 (2004).

206. Schwarz, D.A., Katayama, C.D. & Hedrick, S.M. Schlafen, a new family of growth regulatory genes that affect thymocyte development. *Immunity* **9**, 657-668 (1998).

207. Carpio, M.A.*, et al.* BCL-2 family member BOK promotes apoptosis in response to endoplasmic reticulum stress. *Proc Natl Acad Sci U S A* **112**, 7201-7206 (2015).

208. Czabotar, P.E., Lessene, G., Strasser, A. & Adams, J.M. Control of apoptosis by the BCL-2 protein family: implications for physiology and therapy. *Nat Rev Mol Cell Biol* **15**, 49-63 (2014).

209. Ji, H.*, et al.* AKT-dependent phosphorylation of Niban regulates nucleophosmin- and MDM2-mediated p53 stability and cell apoptosis. *EMBO Rep* **13**, 554-560 (2012).

210. Sun, G.D.*, et al.* The endoplasmic reticulum stress-inducible protein Niban regulates eIF2alpha and S6K1/4E-BP1 phosphorylation. *Biochem Biophys Res Commun* **360**, 181-187 (2007).

211. He, S.*, et al.* Receptor interacting protein kinase-3 determines cellular necrotic response to TNF-alpha. *Cell* **137**, 1100-1111 (2009).

212. Cho, Y.S.*, et al.* Phosphorylation-driven assembly of the RIP1-RIP3 complex regulates programmed necrosis and virus-induced inflammation. *Cell* **137**, 1112-1123 (2009).

213. Zhang, D.W.*, et al.* RIP3, an energy metabolism regulator that switches TNF-induced cell death from apoptosis to necrosis. *Science* **325**, 332-336 (2009).

214. Mellett, M. Regulation and dysregulation of CARD14 signalling and its physiological consequences in inflammatory skin disease. *Cell Immunol* **354**, 104147 (2020).

215. Kawase, T.*, et al.* p53 target gene AEN is a nuclear exonuclease required for p53-dependent apoptosis. *Oncogene* **27**, 3797-3810 (2008).

216. Roberts, O. & Paraoan, L. PERP-ing into diverse mechanisms of cancer pathogenesis: Regulation and role of the p53/p63 effector PERP. *Biochim Biophys Acta Rev Cancer* **1874**, 188393 (2020).

217. Cruikshank, W.W., Kornfeld, H. & Center, D.M. Interleukin-16. *J Leukoc Biol* **67**, 757-766 (2000).

218. Little, F.F.*, et al.* Immunomodulatory effect of interleukin-16 on allergic airway inflammation. *Chest* **123**, 431S-432S (2003).

219. Liu, S.*, et al.* Interleukin 16 contributes to gammaherpesvirus pathogenesis by inhibiting viral reactivation. *PLoS Pathog* **16**, e1008701 (2020).

220. Yoon, T.*, et al.* Serum interleukin-16 significantly correlates with the Vasculitis Damage Index in antineutrophil cytoplasmic antibody-associated vasculitis. *Arthritis Res Ther* **22**, 73 (2020).

221. Kawabata, K.*, et al.* IL-16 expression is increased in the skin and sera of patients with systemic sclerosis. *Rheumatology (Oxford)* **59**, 519-523 (2020).

222. Hamann, J.*, et al.* International Union of Basic and Clinical Pharmacology. XCIV. Adhesion G protein-coupled receptors. *Pharmacol Rev* **67**, 338-367 (2015).

223. Shingai, Y.*, et al.* Autonomous TGFbeta signaling induces phenotypic variation in human acute myeloid leukemia. *Stem Cells* **39**, 723-736 (2021).

224. Duong, C.N.*, et al.* Interference With ESAM (Endothelial Cell-Selective Adhesion Molecule) Plus Vascular Endothelial-Cadherin Causes Immediate Lethality and Lung-Specific Blood Coagulation. *Arterioscler Thromb Vasc Biol* **40**, 378-393 (2020).

225. Angelos, M.G., Abrahante, J.E., Blum, R.H. & Kaufman, D.S. Single Cell Resolution of Human Hematoendothelial Cells Defines Transcriptional Signatures of Hemogenic Endothelium. *Stem Cells* **36**, 206-217 (2018).

226. Gu, P., Theiss, A., Han, J. & Feagins, L.A. Increased Cell Adhesion Molecules, PECAM-1, ICAM-3, or VCAM-1, Predict Increased Risk for Flare in Patients With Quiescent Inflammatory Bowel Disease. *J Clin Gastroenterol* **51**, 522-527 (2017).

227. Yu, Y., Wang, Z., Zheng, Q. & Li, J. GREB1L overexpression correlates with prognosis and immune cell infiltration in lung adenocarcinoma. *Sci Rep* **11**, 13281 (2021).

228. Matsumoto, S.*, et al.* GREB1 induced by Wnt signaling promotes development of hepatoblastoma by suppressing TGFbeta signaling. *Nat Commun* **10**, 3882 (2019).

229. Malinauskas, T., Peer, T.V., Bishop, B., Mueller, T.D. & Siebold, C. Repulsive guidance molecules lock growth differentiation factor 5 in an inhibitory complex. *Proc Natl Acad Sci U S A* **117**, 15620-15631 (2020).

230. Helmke, A.*, et al.* CX3CL1-CX3CR1 interaction mediates macrophage-mesothelial cross talk and promotes peritoneal fibrosis. *Kidney Int* **95**, 1405-1417 (2019).

231. Schmall, A.*, et al.* Macrophage and cancer cell cross-talk via CCR2 and CX3CR1 is a fundamental mechanism driving lung cancer. *Am J Respir Crit Care Med* **191**, 437-447 (2015).

232. Chakarov, S.*, et al.* Two distinct interstitial macrophage populations coexist across tissues in specific subtissular niches. *Science* **363**(2019).

233. Bauche, D.*, et al.* LAG3(+) Regulatory T Cells Restrain Interleukin-23-Producing CX3CR1(+) Gut-Resident Macrophages during Group 3 Innate Lymphoid Cell-Driven Colitis. *Immunity* **49**, 342-352 e345 (2018).

234. Chidambaram, H., Das, R. & Chinnathambi, S. Interaction of Tau with the chemokine receptor, CX3CR1 and its effect on microglial activation, migration and proliferation. *Cell Biosci* **10**, 109 (2020).

235. Korbecki, J.*, et al.* Fractalkine/CX3CL1 in Neoplastic Processes. *Int J Mol Sci* **21**(2020).

236. Jones, S.A. & Jenkins, B.J. Recent insights into targeting the IL-6 cytokine family in inflammatory diseases and cancer. *Nat Rev Immunol* **18**, 773-789 (2018).

237. Stefanovic, L. & Stefanovic, B. Role of cytokine receptor-like factor 1 in hepatic stellate cells and fibrosis. *World J Hepatol* **4**, 356-364 (2012).

238. Ozaki, K. & Leonard, W.J. Cytokine and cytokine receptor pleiotropy and redundancy. *J Biol Chem* **277**, 29355-29358 (2002).

239. Dagoneau, N.*, et al.* Mutations in cytokine receptor-like factor 1 (CRLF1) account for both Crisponi and cold-induced sweating syndromes. *Am J Hum Genet* **80**, 966-970 (2007).

240. Wang, J. & Li, Y. CD36 tango in cancer: signaling pathways and functions. *Theranostics* **9**, 4893-4908 (2019).

241. Janovitz, T., Wong, S., Young, N.S., Oliveira, T. & Falck-Pedersen, E. Parvovirus B19 integration into human CD36+ erythroid progenitor cells. *Virology* **511**, 40-48 (2017).

242. Seizer, P.*, et al.* CD36 and macrophage scavenger receptor a modulate foam cell formation via inhibition of lipid-laden platelet phagocytosis. *Semin Thromb Hemost* **36**, 157-162 (2010).

243. Huangfu, N.*, et al.* LncRNA MALAT1 regulates oxLDL-induced CD36 expression via activating beta-catenin. *Biochem Biophys Res Commun* **495**, 2111-2117 (2018).

244. Huang-Fu, N., Cheng, J.S., Wang, Y., Li, Z.W. & Wang, S.H. Neat1 regulates oxidized low-density lipoprotein-induced inflammation and lipid uptake in macrophages via paraspeckle formation. *Mol Med Rep* **17**, 3092-3098 (2018).

245. Chen, D.D., Hui, L.L., Zhang, X.C. & Chang, Q. NEAT1 contributes to ox-LDL-induced inflammation and oxidative stress in macrophages through inhibiting miR-128. *J Cell Biochem* (2018).

246. Luo, Y.*, et al.* Macrophagic CD146 promotes foam cell formation and retention during atherosclerosis. *Cell Res* **27**, 352-372 (2017).

247. Wang, Z.*, et al.* CD146, from a melanoma cell adhesion molecule to a signaling receptor. *Signal Transduct Target Ther* **5**, 148 (2020).

248. Chang, S.F., Chang, P.Y., Chou, Y.C. & Lu, S.C. Electronegative LDL Induces M1 Polarization of Human Macrophages Through a LOX-1-Dependent Pathway. *Inflammation* **43**, 1524-1535 (2020).

249. Kraler, S.*, et al.* Soluble lectin-like oxidized low-density lipoprotein receptor-1 predicts premature death in acute coronary syndromes. *Eur Heart J* (2022).

250. Khan, K.A.*, et al.* Multimerin-2 is a ligand for group 14 family C-type lectins CLEC14A, CD93 and CD248 spanning the endothelial pericyte interface. *Oncogene* **36**, 6097-6108 (2017).

251. Zani, I.A.*, et al.* Scavenger receptor structure and function in health and disease. *Cells* **4**, 178-201 (2015).

252. Zhao, Y.*, et al.* The immunological function of CD52 and its targeting in organ transplantation. *Inflamm Res* **66**, 571-578 (2017).

253. Mikulska, M.*, et al.* ESCMID Study Group for Infections in Compromised Hosts (ESGICH) Consensus Document on the safety of targeted and biological therapies: an infectious diseases perspective (Agents targeting lymphoid cells surface antigens [I]: CD19, CD20 and CD52). *Clin Microbiol Infect* **24 Suppl 2**, S71-S82 (2018).

254. Ley, K., Pramod, A.B., Croft, M., Ravichandran, K.S. & Ting, J.P. How Mouse Macrophages Sense What Is Going On. *Front Immunol* **7**, 204 (2016).

255. Vitalle, J.*, et al.* The Expression and Function of CD300 Molecules in the Main Players of Allergic Responses: Mast Cells, Basophils and Eosinophils. *Int J Mol Sci* **21**(2020).

256. Vitalle, J., Terren, I., Orrantia, A., Zenarruzabeitia, O. & Borrego, F. CD300 receptor family in viral infections. *Eur J Immunol* **49**, 364-374 (2019).

257. Lewis Marffy, A.L. & McCarthy, A.J. Leukocyte Immunoglobulin-Like Receptors (LILRs) on Human Neutrophils: Modulators of Infection and Immunity. *Front Immunol* **11**, 857 (2020).

258. Buechler, C., Eisinger, K. & Krautbauer, S. Diagnostic and prognostic potential of the macrophage specific receptor CD163 in inflammatory diseases. *Inflamm Allergy Drug Targets* **12**, 391-402 (2013).

259. Thornton, S.*, et al.* A Multiparameter Flow Cytometry Analysis Panel to Assess CD163 mRNA and Protein in Monocyte and Macrophage Populations in Hyperinflammatory Diseases. *J Immunol* **202**, 1635-1643 (2019).

260. Otsuka, F.*, et al.* Community-based statins and advanced carotid plaque: Role of CD163 positive macrophages in lipoprotein-associated phospholipase A2 activity in atherosclerotic plaque. *Atherosclerosis* **267**, 78-89 (2017).

261. Cominelli, A.*, et al.* Matrix metalloproteinase-27 is expressed in CD163+/CD206+ M2 macrophages in the cycling human endometrium and in superficial endometriotic lesions. *Mol Hum Reprod* **20**, 767-775 (2014).

262. Poderoso, T.*, et al.* CD200R family receptors are expressed on porcine monocytes and modulate the production of IL-8 and TNF-alpha triggered by TLR4 or TLR7 in these cells. *Mol Immunol* **144**, 166-177 (2022).

263. Pascoal Ramos, M.I.*, et al.* CD200R1L is a functional evolutionary conserved activating receptor in human neutrophils. *J Leukoc Biol* **111**, 367-377 (2022).

264. Kotwica-Mojzych, K., Jodlowska-Jedrych, B. & Mojzych, M. CD200:CD200R Interactions and Their Importance in Immunoregulation. *Int J Mol Sci* **22**(2021).

265. Shin, S.P.*, et al.* Local adenoviral delivery of soluble CD200R-Ig enhances antitumor immunity by inhibiting CD200-beta-catenin-driven M2 macrophage. *Mol Ther Oncolytics* **23**, 138-150 (2021).

266. Abramiuk, M.*, et al.* CD200 and CD200R Expression on Peripheral Blood Lymphocytes and Serum CD200 Concentration as a New Marker of Endometriosis. *J Clin Med* **9**(2020).

267. Su, Y.*, et al.* Tumor-Infiltrating T Cells Concurrently Overexpress CD200R with Immune Checkpoints PD-1, CTLA-4, and TIM-3 in Non-Small-Cell Lung Cancer. *Pathobiology* **88**, 218-227 (2021).

268. Sun, H.*, et al.* The CD200/CD200R signaling pathway contributes to spontaneous functional recovery by enhancing synaptic plasticity after stroke. *J Neuroinflammation* **17**, 171 (2020).

269. Zhang, X.*, et al.* CD200R Is Involved in the Anti-inflammatory Effect of Dexmedetomidine in Lipopolysaccharide-Stimulated Microglia. *Inflammation* **43**, 1707-1715 (2020).

270. Wang, L.*, et al.* Disease Progression-Dependent Expression of CD200R1 and CX3CR1 in Mouse Models of Parkinson's Disease. *Aging Dis* **11**, 254-268 (2020).

271. Liu, J.Q.*, et al.* CD200-CD200R Pathway in the Regulation of Tumor Immune Microenvironment and Immunotherapy. *Adv Exp Med Biol* **1223**, 155-165 (2020).

272. Boels, M.G.S.*, et al.* Systemic Monocyte Chemotactic Protein-1 Inhibition Modifies Renal Macrophages and Restores Glomerular Endothelial Glycocalyx and Barrier Function in Diabetic Nephropathy. *Am J Pathol* **187**, 2430-2440 (2017).

273. Fadini, G.P.*, et al.* An unbalanced monocyte polarisation in peripheral blood and bone marrow of patients with type 2 diabetes has an impact on microangiopathy. *Diabetologia* **56**, 1856-1866 (2013).

274. Suzuki, Y.*, et al.* Macrophage mannose receptor, CD206, predict prognosis in patients with pulmonary tuberculosis. *Sci Rep* **8**, 13129 (2018).

275. Ushach, I. & Zlotnik, A. Biological role of granulocyte macrophage colony-stimulating factor (GM-CSF) and macrophage colony-stimulating factor (M-CSF) on cells of the myeloid lineage. *J Leukoc Biol* **100**, 481-489 (2016).
